# Supplementary material for: Integrated analysis of 14 lymphoma datasets revealed high expression of CXCL14 promotes cell migration in mantle cell lymphoma
Source: Aging (Albany NY). 2022 Apr 22;14(8):3446–63. doi: 10.18632/aging.204022 (PMC9085238; doi:10.18632/aging.204022)
Supplement: Supplementary Tables 2-4 and 7 [file aging-14-204022-s003.xlsx]

## Sheet: Supplementary Table 2
Supplementary Table 2. All KEGG pathway enrichment results in Hodgkin's lymphoma.
PathwayID	PathwayName	Count	Size	Percent	Pvalue	FDR	GeneSymbol
path:hsa04610	Complement and coagulation cascades	36	77	0.47	8.26342e-10	2.57819e-07	C3 F8 C1R C1QC C1S F2R CLU C1QB SERPING1 PLAU C7 SERPINA1 A2M C5AR1 PLAUR CFH C1QA TFPI SERPINB2 VWF PROS1 CD46 PLAT F3 C3AR1 PROCR VSIG4 CFI CD59 F5 F13A1 THBD ITGAM SERPINE1 CFD CR2
path:hsa04060	Cytokine-cytokine receptor interaction	78	252	0.31	6.79301e-08	1.05971e-05	TNFSF13B CCL19 CXCL13 IL7R CCR5 IL1R1 ACVR1 CCL18 CCL27 IFNGR2 CCL2 TNFRSF1A CXCL12 CCR10 IL18 CXCL10 CXCL9 CCL4 CCL5 CD70 VEGFC IL17C LIFR CSF1R CSF3R IL10 IL2RB OSMR IL13RA1 CCR7 PDGFC CX3CR1 CXCL14 TNFRSF9 PDGFRA BMP2 FASLG CXCR6 CX3CL1 IL10RA IL1B TNFRSF1B CCL8 CCR1 CCR2 IL18R1 IL15 TNFRSF21 IL18RAP TNFSF4 TNFRSF13C LIF BMPR1A CXCL11 CSF2RA IL12B FAS KDR KIT CCL21 TNFRSF11B PDGFRB XCL1 IL1R2 …
path:hsa04115	p53 signaling pathway	27	66	0.41	2.21688e-06	0.000230556	CYCS CD82 EI24 IGFBP3 GORAB SESN1 ATM TP53 MDM4 MDM2 BID CCND1 TP53I3 THBS1 PPM1D CCNG1 CDK1 CHEK1 CDK4 STEAP3 FAS CCNB1 CCND2 SERPINE1 SFN RRM2 IGF1
path:hsa05144	Malaria	20	44	0.45	4.28351e-06	0.000334114	VCAM1 MYD88 CCL2 IL18 IL10 TLR4 SDC2 IL1B SELP CD36 HBB THBS1 TLR2 CD81 THBS2 KLRK1 IL6 KLRB1 SELE IFNG
path:hsa05143	African trypanosomiasis	16	32	0.5	5.61513e-06	0.000350384	VCAM1 GNAQ MYD88 IL18 THOP1 IDO2 IDO1 IL10 FASLG IL1B HBB IL12B FAS IL6 SELE IFNG
path:hsa00270	Cysteine and methionine metabolism	19	44	0.43	1.8053e-05	0.000938756	MDH1 BHMT AHCY MAT2B MDH2 GOT2 DNMT1 GCLM CTH ENOPH1 LDHA MTR GCLC ADI1 IL4I1 LDHB BCAT1 TST CDO1
path:hsa05134	Legionellosis	21	52	0.4	2.80779e-05	0.00125147	C3 CYCS MYD88 TLR5 IL18 CD14 NFKBIA RAB1B VCP TLR4 IL1B BNIP3 PYCARD CASP1 TLR2 IL12B ITGAM HSPA1A CXCL2 CXCL1 IL6
path:hsa04216	Ferroptosis	17	39	0.44	3.65919e-05	0.00142708	SLC40A1 ACSL3 FTL MAP1LC3A GCLM SLC3A2 GPX4 NCOA4 TP53 HMOX1 GCLC CYBB SAT1 SLC7A11 ACSL1 STEAP3 FTH1
path:hsa05340	Primary immunodeficiency	16	36	0.44	4.16941e-05	0.0014454	CD3D IL7R CD8A ORAI1 CD3E CD4 ADA ZAP70 CIITA TNFRSF13C ICOS RFXANK LCK CD79A CD8B AICDA
path:hsa05323	Rheumatoid arthritis	28	81	0.35	7.06166e-05	0.00220324	TNFSF13B TEK CCL2 CXCL12 IL18 CCL5 CTSK TLR4 IL1B ATP6V1F ATP6V0E1 MMP3 CD28 IL15 ATP6V0B ATP6V1B2 ACP5 TLR2 ATP6AP1 ATP6V1G1 HLA-DOB MMP1 CD86 CTLA4 CD80 CXCL1 IL6 IFNG
path:hsa05150	Staphylococcus aureus infection	19	49	0.39	0.000117833	0.00334217	C3 FPR1 C1R C1QC C1S C1QB SELPLG IL10 C5AR1 CFH C1QA SELP FPR3 C3AR1 CFI FCGR3B HLA-DOB ITGAM CFD
path:hsa00520	Amino sugar and nucleotide sugar metabolism	18	48	0.38	0.000279026	0.00466387	NPL GNPDA1 CYB5R2 TSTA3 NANP FUK HK1 RENBP UAP1 FPGT HK3 GMDS HEXB UXS1 GPI PGM1 GFPT2 CHIT1
path:hsa04062	Chemokine signaling pathway	48	172	0.28	0.000281479	0.00466387	CCL19 CXCL13 AKT2 ITK CCR5 CCL18 HCK CCL27 CCL2 CXCL12 CCR10 CXCL10 PIK3R3 CXCL9 CCL4 CCL5 NFKBIA TIAM1 JAK2 CHUK CCR7 GNG10 CX3CR1 GNG5 PREX1 CXCL14 ADCY3 CXCR6 CX3CL1 PAK1 ARRB1 FGR GNAI1 GNG12 CCL8 CCR1 CCR2 GNB2 CXCL11 GNG11 CCL21 XCL1 STAT1 CXCL2 CXCL1 CCL24 CCL22 CCL17
path:hsa04110	Cell cycle	37	123	0.3	0.00022639	0.00466387	SMC1A TTK PCNA PTTG2 CDC23 ESPL1 DBF4 YWHAG ABL1 MCM7 STAG2 ATM TP53 CDKN1B RBX1 YWHAQ MDM2 CCND1 ORC4 YWHAE CDC6 CDKN2C MCM5 CDC7 CDK1 MCM2 CHEK1 CDK4 CDC45 CCNB1 MAD2L1 CCND2 CDC20 E2F5 BUB1B SFN PTTG1
path:hsa04142	Lysosome	36	120	0.3	0.000284018	0.00466387	CTSC LAMP2 AP3M2 PPT1 AP4M1 CTSK LAMP3 NAPSA CD68 SORT1 ACP2 GGA2 CTSA NPC2 LGMN AP3S1 ASAH1 CTSB LAPTM4B ATP6V0B ACP5 CTSO DNASE2 HEXB LIPA ATP6AP1 CTSD SCARB2 CD63 PSAP AP1S2 GLB1 NAGA MCOLN1 NEU1 GNS
path:hsa04640	Hematopoietic cell lineage	30	93	0.32	0.000185749	0.00466387	CD2 CD3D IL7R IL1R1 CD3G CD8A CD14 CD3E CSF1R CSF3R CD4 IL1B CD34 ITGA1 CD36 CD22 CD59 CD44 CSF2RA CD33 HLA-DOB KIT ITGAM IL1R2 CD8B IL7 CD1B IL6 CR2 CD24
path:hsa04668	TNF signaling pathway	33	107	0.31	0.000263284	0.00466387	VCAM1 AKT2 MMP9 MAPK10 ATF6B CEBPB CCL2 TNFRSF1A CXCL10 TNFAIP3 PIK3R3 CCL5 VEGFC JAG1 NFKBIA CHUK CX3CL1 IL1B TNFRSF1B MAP3K5 MMP14 NOD2 MMP3 IL18R1 IL15 LIF FAS MLKL LTA CXCL2 CXCL1 IL6 SELE
path:hsa05142	Chagas disease (American trypanosomiasis)	31	98	0.32	0.000226653	0.00466387	GNAQ CD3D C3 AKT2 CD3G MAPK10 MYD88 CD247 IFNGR2 CCL2 TNFRSF1A C1QC PIK3R3 CCL5 CD3E C1QB NFKBIA IL10 CHUK TLR4 C1QA GNA15 FASLG IL1B GNAI1 TLR2 IL12B FAS SERPINE1 IL6 IFNG
path:hsa05146	Amoebiasis	30	94	0.32	0.000230936	0.00466387	GNAQ IL1R1 RAB7A ACTN1 COL4A1 CD14 COL3A1 PIK3R3 ARG2 FN1 COL1A2 IL10 TLR4 GNA15 HSPB1 COL4A2 IL1B SERPINB3 LAMB1 TLR2 SERPINB6 IL12B COL1A1 LAMB2 ITGAM IL1R2 LAMC1 CXCL1 IL6 IFNG
path:hsa04940	Type I diabetes mellitus	15	40	0.38	0.000726135	0.0113277	GZMB PRF1 CPE HLA-G FASLG IL1B CD28 HLA-C HLA-DOB IL12B FAS CD86 CD80 LTA IFNG
path:hsa05322	Systemic lupus erythematosus	30	102	0.29	0.00110957	0.0157357	C3 SNRPB C1R ACTN1 C1QC C1S C1QB C7 IL10 HIST1H4E C1QA HIST2H2AA3 HIST1H4C HIST1H2AC HIST1H2BK HIST1H4H CD28 FCGR3B HIST1H4B HLA-DOB HIST3H2A CD86 HIST1H2BI HIST1H2AJ HIST1H2AI HIST1H3I CD80 HIST1H2BF HIST1H2AE IFNG
path:hsa05330	Allograft rejection	13	34	0.38	0.00110121	0.0157357	GZMB PRF1 IL10 HLA-G FASLG CD28 HLA-C HLA-DOB IL12B FAS CD86 CD80 IFNG
path:hsa05418	Fluid shear stress and atherosclerosis	37	133	0.28	0.00121134	0.0164321	VCAM1 SUMO4 AKT2 MMP9 IL1R1 ACVR1 MAPK10 SDC4 CCL2 TNFRSF1A MGST1 NQO1 PIK3R3 ITGAV CAV1 CHUK CAV2 TP53 SDC2 IL1B HMOX1 MAP3K5 PLAT BMPR1A THBD GSTM3 KEAP1 ASS1 MGST3 KDR TXN IL1R2 GSTO1 NCF2 GSTM2 SELE IFNG
path:hsa04064	NF-kappa B signaling pathway	26	86	0.3	0.00132388	0.0172104	VCAM1 TNFSF13B CCL19 IL1R1 MYD88 TNFRSF1A CXCL12 CD14 TNFAIP3 CCL4 PRKCQ NFKBIA PLAU CHUK TLR4 RELB ATM IL1B ZAP70 TNFRSF13C BCL2A1 LCK CCL21 LTA CXCL2 LY96
path:hsa00480	Glutathione metabolism	17	50	0.34	0.00148863	0.0183142	GPX1 MGST1 GSTK1 LAP3 GCLM GPX4 HPGDS GCLC GPX8 GSTM3 PGD MGST3 GSTO1 G6PD GPX3 RRM2 GSTM2
path:hsa04145	Phagosome	38	139	0.27	0.00152618	0.0183142	C3 SEC61B C1R LAMP2 RAB7A CD14 ITGAV COLEC12 TUBB6 SEC61A2 ITGB1 TLR4 HLA-G TUBA1C ATP6V1F COLEC11 ATP6V0E1 CYBB CD36 ITGB5 ATP6V0B HLA-C ATP6V1B2 MRC2 THBS1 FCGR3B TLR2 TUBA1B ATP6AP1 CLEC7A ATP6V1G1 HLA-DOB HGS ITGAM TUBA1A THBS2 NCF2 MARCO
path:hsa05202	Transcriptional misregulation in cancer	45	171	0.26	0.00160064	0.0184963	MMP9 SMAD1 TCF3 SIN3A CEBPA GZMB ID2 CDK9 RXRB CEBPB DUSP6 MAX SP1 CD14 MITF IGFBP3 MLLT3 BCL11B CSF1R PLAU IL2RB TAF15 MAF PBX1 ARNT2 ATM TP53 JMJD1C CDKN1B NUPR1 MDM2 PLAT TSPAN7 MMP3 JUP CDKN2C BCL2A1 CCND2 CD86 ITGAM HPGD IL1R2 HIST1H3I IL6 IGF1
path:hsa05133	Pertussis	22	71	0.31	0.00184713	0.0205823	C3 C1R MAPK10 MYD88 C1QC CD14 C1S C1QB SERPING1 IL10 ITGB1 TLR4 C1QA IL1B GNAI1 PYCARD CASP1 IL12B ITGAM IRF1 LY96 IL6
path:hsa04658	Th1 and Th2 cell differentiation	26	88	0.3	0.0019298	0.020762	CD3D CD3G MAPK10 STAT4 CD247 IFNGR2 PRKCQ CD3E MAML2 JAG1 NFKBIA JAK2 IL2RB CHUK MAF CD4 MAML1 GATA3 NFKBIE PPP3CC ZAP70 HLA-DOB IL12B LCK STAT1 IFNG
path:hsa05332	Graft-versus-host disease	13	36	0.36	0.00211683	0.022015	GZMB PRF1 HLA-G FASLG IL1B CD28 HLA-C HLA-DOB FAS CD86 CD80 IL6 IFNG
path:hsa04978	Mineral absorption	16	48	0.33	0.00244074	0.0243984	SLC40A1 CYBRD1 FTL ATP1B1 MT2A MT1E ATOX1 HMOX1 STEAP2 MT1X MT1F MT1G MT1H FTH1 STEAP1 MT1M
path:hsa05162	Measles	35	129	0.27	0.0025024	0.0243984	CD3D AKT2 CD3G MYD88 IFNGR2 RAB9B TNFAIP3 PIK3R3 PRKCQ CD3E NFKBIA JAK2 IL2RB FYN CHUK TLR4 FASLG TP53 CDKN1B IL1B IKBKE CD46 CD28 CCND1 TLR2 IL12B CDK4 FAS CCND2 STAT1 TNFSF10 HSPA1A SH2D1A IL6 IFNG
path:hsa00010	Glycolysis / Gluconeogenesis	20	65	0.31	0.00296295	0.0280133	PGAM1 DLD ALDH9A1 HK1 PGAM2 ADH5 ACSS2 GALM MINPP1 TPI1 LDHA GAPDH HK3 ALDOA LDHB ENO1 FBP1 GPI PGM1 ALDH1A3
path:hsa05132	Salmonella infection	23	79	0.29	0.00385577	0.0353824	MAPK10 MYD88 RAB7A TLR5 IFNGR2 IL18 CD14 CCL4 ARPC1B PLEKHM2 TLR4 IL1B RHOG FLNA PYCARD CASP1 MYH10 TJP1 CXCL2 CXCL1 PFN2 IL6 IFNG
path:hsa03050	Proteasome	14	43	0.33	0.00506332	0.0427918	PSMB1 PSMC2 PSMD3 PSMA3 PSMB3 PSMB5 PSMA4 PSMB10 PSMA2 PSMD12 PSMD14 PSMB8 ADRM1 IFNG
path:hsa03420	Nucleotide excision repair	14	43	0.33	0.00506332	0.0427918	DDB1 POLD1 XPC RPA4 ERCC4 PCNA CUL4B RPA1 RBX1 GTF2H2 RFC5 RPA3 POLE3 MNAT1
path:hsa05145	Toxoplasmosis	29	107	0.27	0.00507467	0.0427918	AKT2 CYCS CCR5 MAPK10 MYD88 IFNGR2 TNFRSF1A NFKBIA JAK2 IL10 CHUK ITGB1 TLR4 IL10RA GNAI1 PIK3CG LAMB1 CIITA PPIF TLR2 HLA-DOB IL12B LAMB2 STAT1 LAMC1 HSPA1A IL10RB LY96 IFNG
path:hsa04512	ECM-receptor interaction	23	81	0.28	0.00547234	0.0449308	COL6A3 SDC4 COL4A1 TNC ITGAV FN1 COL1A2 ITGB1 VWF COL4A2 ITGA1 CD36 ITGB5 LAMB1 THBS1 CD44 SPP1 HMMR COL1A1 LAMB2 LAMC1 THBS2 COL6A2
path:hsa03030	DNA replication	12	36	0.33	0.00634084	0.0494586	POLD1 RPA4 POLA2 PCNA RPA1 MCM7 DNA2 RFC5 RPA3 MCM5 POLE3 MCM2
path:hsa05166	HTLV-I infection	59	250	0.24	0.00633327	0.0494586	VCAM1 CD3D POLD1 AKT2 TCF3 IL1R1 CD3G TNFRSF1A PIK3R3 CD3E NFKBIA PCNA PTTG2 CDC23 FZD7 TSPO IL2RB KAT2A CHUK FZD4 HLA-G RELB TP53INP1 MRAS MYBL2 ADCY3 PDGFRA ATM TP53 FZD6 ETS1 PPP3CC TLN1 IL15 HLA-C CCND1 POLB TNFRSF13C RAN CDKN2C RRAS WNT2 POLE3 HLA-DOB CHEK1 CDK4 LCK MAP3K1 MAD2L1 CCND2 PDGFRB CDC20 IL1R2 LTA WNT5A BUB1B FZD2 PTTG1 IL6
path:hsa04660	T cell receptor signaling pathway	27	100	0.27	0.00676079	0.051448	CD3D AKT2 ITK CD3G CD8A CD247 LCP2 PIK3R3 PRKCQ CD3E NFKBIA IL10 FYN CHUK CD4 PAK1 NFKBIE PPP3CC CD28 PAK3 ZAP70 ICOS CDK4 LCK CTLA4 CD8B IFNG
path:hsa04620	Toll-like receptor signaling pathway	26	96	0.27	0.00725247	0.0538755	AKT2 MAPK10 MYD88 TLR5 CXCL10 CD14 PIK3R3 CXCL9 CCL4 CCL5 CTSK NFKBIA CHUK TLR4 TLR8 IL1B IKBKE TLR2 CXCL11 SPP1 IL12B CD86 STAT1 CD80 LY96 IL6
path:hsa01524	Platinum drug resistance	20	70	0.29	0.00772926	0.0560821	AKT2 CYCS MLH1 MGST1 REV3L PIK3R3 POLH FASLG ATM TP53 MAP3K5 MDM2 BRCA1 BID GSTM3 TOP2A MGST3 FAS GSTO1 GSTM2
path:hsa00983	Drug metabolism - other enzymes	11	33	0.33	0.00807136	0.0572333	ITPA IMPDH1 UCK2 IMPDH2 NAT1 UGT2B17 DPYD TK1 CES1 TYMP UPP1
path:hsa05321	Inflammatory bowel disease (IBD)	18	62	0.29	0.00860192	0.05964	STAT4 TLR5 IFNGR2 IL18 IL10 MAF TLR4 GATA3 IL1B NOD2 IL18R1 IL18RAP TLR2 HLA-DOB IL12B STAT1 IL6 IFNG
path:hsa03430	Mismatch repair	8	22	0.36	0.00890921	0.0604277	POLD1 RPA4 MLH1 PCNA RPA1 RFC5 RPA3 EXO1
path:hsa05152	Tuberculosis	42	172	0.24	0.00917016	0.0608743	C3 AKT2 CYCS MAPK10 MYD88 LAMP2 CEBPB RAB7A IFNGR2 SPHK1 FCER1G TNFRSF1A IL18 CD14 RIPK2 JAK2 IL10 CLEC4E CYP27B1 TLR4 CD74 IL10RA IL1B PPP3CC NOD2 BID ATP6V0B CIITA MRC2 FCGR3B TLR2 ATP6AP1 CLEC7A CTSD HLA-DOB RFXANK IL12B ITGAM STAT1 IL10RB IL6 IFNG
path:hsa01100	Metabolic pathways	230	1143	0.2	0.0107928	0.0701532	CYP26A1 CKM COX8C PTGDS POLD1 UQCRC1 PIGA CYCS PLA2G7 B3GNT4 POLR2A B4GALNT4 ACO1 GNPDA1 HMBS MTHFD1 TALDO1 ITPA ACOT4 AGPAT5 PGAM1 PAPSS2 PLD1 HYAL2 IMPDH1 ACSL3 INPP5E INPP5K MDH1 BHMT EXTL2 SPHK1 NNMT IMPA1 SPR PLCD1 TSTA3 EHHADH ALLC NME3 POLA2 REV3L PPT1 SDHD PLA2G2D CKB BCKDHA DLD ARG2 UQCR10 CYP27A1 OAT MECR NANP DEGS2 FKTN PRODH AHCY CNDP1 MAN1C1 UCK2 MCAT COQ5 FUK MAT2B PIGU MDH2 FECH CP…
path:hsa00062	Fatty acid elongation	7	19	0.37	0.0110805	0.0705534	ELOVL7 ACOT4 PPT1 MECR HADHB ELOVL1 HADH
path:hsa00920	Sulfur metabolism	4	9	0.44	0.0114196	0.0712583	CYCS PAPSS2 ETHE1 TST
path:hsa04066	HIF-1 signaling pathway	25	95	0.26	0.0120103	0.0734748	AKT2 TIMP1 TEK IFNGR2 PIK3R3 HIF1A HK1 TLR4 MKNK1 CDKN1B RBX1 HMOX1 LDHA GAPDH CYBB EIF4EBP1 HK3 ALDOA MKNK2 ENO1 EGLN3 SERPINE1 IL6 IGF1 IFNG
path:hsa05020	Prion diseases	11	35	0.31	0.0134822	0.0808932	C1QC CCL5 C1QB C7 FYN C1QA IL1B LAMC1 HSPA1A STIP1 IL6
path:hsa04933	AGE-RAGE signaling pathway in diabetic complications	25	97	0.26	0.0157468	0.0926981	VCAM1 AKT2 MAPK10 CCL2 COL4A1 PLCD1 COL3A1 PIK3R3 FN1 VEGFC COL1A2 JAK2 COL4A2 CDKN1B IL1B CYBB F3 CCND1 THBD CDK4 COL1A1 STAT1 SERPINE1 IL6 SELE
path:hsa03320	PPAR signaling pathway	19	70	0.27	0.016048	0.0927218	NR1H3 RXRB PLIN2 ACSL3 EHHADH CYP27A1 SCP2 SLC27A1 CD36 ACSL1 ME1 SLC27A2 FABP5 MMP1 ACADM FABP4 LPL PLTP ADIPOQ
path:hsa04514	Cell adhesion molecules (CAMs)	33	135	0.24	0.0169435	0.0961159	CD2 VCAM1 SDC4 CD8A ITGAV CNTNAP1 PTPRM SELPLG NRCAM ITGB1 TIGIT HLA-G CADM1 CD4 CDH3 CLDN20 SDC2 CD34 SELP CD274 CD28 CD22 HLA-C SIGLEC1 ICOS HLA-DOB VCAN CD86 ITGAM CTLA4 CD80 CD8B SELE
path:hsa00982	Drug metabolism - cytochrome P450	15	53	0.28	0.0175534	0.0977975	MGST1 GSTK1 FMO4 FMO2 HPGDS ADH5 UGT2B17 GSTM3 AOX1 MGST3 GSTO1 FMO3 ALDH1A3 GSTM2 FMO1
path:hsa04659	Th17 cell differentiation	26	103	0.25	0.0187822	0.102808	CD3D IL1R1 CD3G AHR MAPK10 RXRB CD247 IFNGR2 PRKCQ CD3E NFKBIA HIF1A JAK2 IL2RB CHUK CD4 GATA3 IL1B NFKBIE PPP3CC ZAP70 HLA-DOB LCK STAT1 IL6 IFNG
path:hsa04672	Intestinal immune network for IgA production	13	45	0.29	0.0195452	0.10514	TNFSF13B CXCL12 CCR10 IL10 CD28 IL15 TNFRSF13C ICOS HLA-DOB CD86 CD80 IL6 AICDA
path:hsa00380	Tryptophan metabolism	11	37	0.3	0.0212897	0.110706	CYP1B1 EHHADH IDO2 IDO1 ALDH9A1 ASMT GCDH HADH IL4I1 AOX1 TDO2
path:hsa04657	IL-17 signaling pathway	23	90	0.26	0.0210216	0.110706	S100A7 MAPK6 MMP9 MAPK10 S100A8 CEBPB CCL2 CXCL10 TNFAIP3 NFKBIA DEFB4A IL17C CHUK S100A9 IL1B IKBKE MMP3 MMP1 CXCL2 CXCL1 IL6 IFNG CCL17
path:hsa03410	Base excision repair	10	33	0.3	0.0219285	0.111744	POLD1 PARP4 MUTYH PCNA TDG XRCC1 POLB MPG POLE3 NEIL3
path:hsa04392	Hippo signaling pathway - multiple species	8	25	0.32	0.0222055	0.111744	LATS1 FRMD6 YAP1 RASSF4 WWTR1 LATS2 TEAD1 PAK1
path:hsa05140	Leishmaniasis	18	68	0.26	0.0234607	0.116186	C3 MYD88 IFNGR2 NFKBIA JAK2 IL10 ITGB1 TLR4 IL1B CYBB FCGR3B TLR2 HLA-DOB IL12B ITGAM STAT1 NCF2 IFNG
path:hsa05205	Proteoglycans in cancer	45	197	0.23	0.0243864	0.118884	LUM AKT2 MMP9 SDC4 TIMP3 PIK3R3 ITGAV FN1 MIR21 CAV1 TIAM1 PLAU HIF1A FZD7 PLAUR FZD4 ITGB1 TLR4 CAV2 MRAS HPSE DCN PPP1CC FASLG PAK1 TP53 SDC2 FZD6 MDM2 FLNA EZR ITGB5 CCND1 THBS1 CD44 TLR2 RRAS WNT2 CD63 IL12B FAS KDR WNT5A FZD2 IGF1
path:hsa05168	Herpes simplex infection	40	173	0.23	0.0256424	0.123084	C3 CYCS POLR2A GTF2I MAPK10 MYD88 TAF13 IFNGR2 CCL2 TNFRSF1A CCL5 TAF6 NFKBIA SRSF4 JAK2 EEF1D CHUK TAF3 SRSF5 HLA-G CDC34 CD74 CFP PPP1CC FASLG TP53 IL1B IKBKE IL15 HLA-C TLR2 CDK1 HLA-DOB IL12B FAS STAT1 LTA IL6 IFIT1 IFNG
path:hsa05130	Pathogenic Escherichia coli infection	14	51	0.27	0.0265984	0.125738	TLR5 CD14 ARPC1B TUBB6 FYN ITGB1 TLR4 ABL1 TUBA1C YWHAQ EZR TUBA1B TUBA1A LY96
path:hsa00051	Fructose and mannose metabolism	9	30	0.3	0.0282826	0.129767	TSTA3 FUK HK1 TPI1 FPGT HK3 ALDOA GMDS FBP1
path:hsa00500	Starch and sucrose metabolism	9	30	0.3	0.0282826	0.129767	HK1 GYG1 GBA3 AGL GBE1 HK3 GPI PGM1 PYGL
path:hsa00130	Ubiquinone and other terpenoid-quinone biosynthesis	4	11	0.36	0.0307276	0.138592	NQO1 COQ5 COQ3 VKORC1
path:hsa00785	Lipoic acid metabolism	1	2	0.5	0.0310943	0.138592	LIAS
path:hsa04630	Jak-STAT signaling pathway	36	156	0.23	0.0323091	0.141978	IL7R AKT2 STAT4 IFNGR2 PIK3R3 MCL1 STAM LIFR SOCS7 JAK2 CSF3R IL10 IL2RB FHL1 OSMR IL13RA1 PDGFRA SOCS5 IL10RA SOCS2 IL15 CCND1 LIF CISH CSF2RA AOX1 IL12B CCND2 PDGFRB STAT1 IL10RB IL7 IL22RA2 IL6 IL9 IFNG
path:hsa00740	Riboflavin metabolism	3	8	0.38	0.0370716	0.160644	ACP2 BLVRB ACP5
path:hsa03013	RNA transport	33	143	0.23	0.0376344	0.160848	SUMO4 CYFIP1 RPP40 POM121 NUP35 GEMIN4 POP1 EIF4A1 XPOT CLNS1A NUP205 EIF4A3 EIF3D DDX20 POP4 EIF2B4 NUP88 EIF4G3 EIF5B SNUPN TPR POP7 NUP37 FMR1 RGPD1 GEMIN5 EIF4EBP1 EIF2B2 ACIN1 RAN NXT1 EIF1AX EIF1AY
path:hsa01230	Biosynthesis of amino acids	17	67	0.25	0.0390031	0.16338	ACO1 TALDO1 PGAM1 ARG2 MAT2B GOT2 PGAM2 CTH TPI1 GLUL ALDH18A1 GAPDH MTR ALDOA ENO1 BCAT1 ASS1
path:hsa04510	Focal adhesion	43	193	0.22	0.039274	0.16338	MYL2 COL6A3 AKT2 MAPK10 ACTN1 COL4A1 CAPN2 TNC PIK3R3 ITGAV VASP FN1 VEGFC CAV1 COL1A2 FYN ITGB1 PDGFC CAV2 VWF PDGFRA PARVA PPP1CC COL4A2 PAK1 ITGA1 FLNA ITGB5 TLN1 LAMB1 PAK3 CCND1 THBS1 SPP1 KDR COL1A1 CCND2 PDGFRB LAMB2 LAMC1 THBS2 COL6A2 IGF1
path:hsa00400	Phenylalanine, tyrosine and tryptophan biosynthesis	2	5	0.4	0.0413412	0.165365	GOT2 IL4I1
path:hsa00524	Neomycin, kanamycin and gentamicin biosynthesis	2	5	0.4	0.0413412	0.165365	HK1 HK3
path:hsa00750	Vitamin B6 metabolism	2	5	0.4	0.0413412	0.165365	PNPO AOX1
path:hsa03460	Fanconi anemia pathway	12	45	0.27	0.0429178	0.169498	PALB2 RPA4 MLH1 REV3L ERCC4 POLH RPA1 BRCA1 USP1 RPA3 RMI1 BRIP1
path:hsa04623	Cytosolic DNA-sensing pathway	15	59	0.25	0.0459929	0.179372	IL33 IL18 CXCL10 CCL4 CCL5 TMEM173 NFKBIA CHUK TREX1 POLR2E IL1B IKBKE PYCARD CASP1 IL6
path:hsa04390	Hippo signaling pathway	33	146	0.23	0.049041	0.188899	LATS1 SMAD1 CTNNA2 ID2 FRMD6 YAP1 FBXW11 WWTR1 LATS2 FZD7 YWHAG TCF7L2 TP53BP2 FZD4 AXIN1 ID1 SMAD7 BMP2 TEAD1 PPP1CC YWHAQ FZD6 CCND1 LEF1 BMPR1A YWHAE SNAI2 WNT2 CCND2 WNT5A CTGF SERPINE1 FZD2
path:hsa05416	Viral myocarditis	14	55	0.25	0.0499581	0.190084	CYCS PRF1 CAV1 FYN HLA-G EIF4G3 ABL1 CD28 BID HLA-C CCND1 HLA-DOB CD86 CD80
path:hsa00330	Arginine and proline metabolism	11	42	0.26	0.0546061	0.205266	CKM CKB ARG2 OAT PRODH CNDP1 GOT2 ALDH9A1 LAP3 ALDH18A1 SAT1
path:hsa00860	Porphyrin and chlorophyll metabolism	8	29	0.28	0.0563436	0.209276	HMBS FECH CPOX UGT2B17 HMOX1 BLVRB ALAS1 HCCS
path:hsa00590	Arachidonic acid metabolism	14	56	0.25	0.0575216	0.21022	PTGDS GPX1 PLA2G2D HPGDS PLA2G4C PLA2G16 GPX8 PTGES3 LTA4H PLA2G4A CBR3 CBR1 GPX3 AKR1C3
path:hsa04217	Necroptosis	33	148	0.22	0.0579452	0.21022	MAPK10 STAT4 IL33 IFNGR2 CAPN2 TNFRSF1A PARP4 TNFAIP3 FTL JAK2 TLR4 HIST2H2AA3 GLUL FASLG PLA2G4C IL1B HIST1H2AC CYBB BID PYCARD CASP1 PLA2G4A HIST3H2A FAS HIST1H2AJ PYGL HIST1H2AI STAT1 TNFSF10 MLKL HIST1H2AE FTH1 IFNG
path:hsa00620	Pyruvate metabolism	10	38	0.26	0.058974	0.211493	MDH1 GLO1 DLD MDH2 ALDH9A1 ACACA ACSS2 LDHA LDHB ME1
path:hsa01200	Carbon metabolism	25	109	0.23	0.0606831	0.215149	ACO1 TALDO1 PGAM1 MDH1 EHHADH SDHD DLD MDH2 GOT2 HK1 PGAM2 ADH5 ACSS2 TPI1 GAPDH HK3 ALDOA ENO1 ME1 PGD FBP1 GPI G6PD ACADM GLDC
path:hsa00061	Fatty acid biosynthesis	4	13	0.31	0.0630624	0.220417	ACSL3 MCAT ACACA ACSL1
path:hsa03440	Homologous recombination	9	34	0.26	0.0635818	0.220417	POLD1 PALB2 RPA4 RPA1 ATM BRCA1 RPA3 BRIP1 RBBP8
path:hsa00980	Metabolism of xenobiotics by cytochrome P450	14	57	0.25	0.0658309	0.225706	CYP1B1 MGST1 GSTK1 HPGDS ADH5 UGT2B17 HSD11B1 GSTM3 MGST3 CBR3 CBR1 GSTO1 ALDH1A3 GSTM2
path:hsa00280	Valine, leucine and isoleucine degradation	12	48	0.25	0.0683182	0.226849	EHHADH BCKDHA DLD ALDH9A1 HADHB HSD17B10 AUH HADH IL4I1 AOX1 BCAT1 ACADM
path:hsa05200	Pathways in cancer	104	520	0.2	0.0690727	0.226849	GNAQ LRP6 IL7R AKT2 CYCS MMP9 LPAR1 CTNNA2 CEBPA MAPK10 RXRB PLD1 STAT4 MAX IFNGR2 COL4A1 MLH1 CXCL12 SP1 PTGER4 MGST1 MITF NQO1 PIK3R3 F2R ITGAV FN1 VEGFC JAG1 NFKBIA CTBP2 CSF1R HIF1A JAK2 CSF3R FZD7 IL2RB TCF7L2 EPAS1 CHUK IL13RA1 FZD4 ITGB1 NCOA4 GNG10 GNG5 AXIN1 DAPK1 ABL1 ADCY3 PDGFRA APPL1 ARNT2 BMP2 FASLG COL4A2 TP53 CDKN1B LPAR6 RBX1 FZD6 HEY1 TPR HMOX1 MDM2 GNAI1 ETS1 NCOA3 GNG12 BID IL…
path:hsa05230	Central carbon metabolism in cancer	15	62	0.24	0.0685139	0.226849	AKT2 PGAM1 SCO2 PIK3R3 HIF1A HK1 PGAM2 PDGFRA TP53 LDHA SLC7A5 HK3 KIT PDGFRB G6PD
path:hsa05320	Autoimmune thyroid disease	12	48	0.25	0.0683182	0.226849	GZMB PRF1 IL10 HLA-G FASLG CD28 HLA-C HLA-DOB FAS CD86 CTLA4 CD80
path:hsa04120	Ubiquitin mediated proteolysis	29	131	0.22	0.0737775	0.239777	DDB1 UBE2D4 UBE2NL UBE2S UBE2E1 UBE4B STUB1 FBXW11 CDC23 NEDD4 CUL4B UBA2 CDC34 UBE2D1 WWP1 TRIM32 UBE2M RBX1 MGRN1 MDM2 BRCA1 PRPF19 UBE2E3 KEAP1 UBE2C MAP3K1 CDC20 RHOBTB1 UBE2Q2
path:hsa04920	Adipocytokine signaling pathway	16	68	0.24	0.0795172	0.255767	AKT2 MAPK10 RXRB ACSL3 TNFRSF1A PRKCQ NFKBIA ADIPOR2 JAK2 CHUK IRS2 TNFRSF1B CD36 NFKBIE ACSL1 ADIPOQ
path:hsa00514	Other types of O-glycan biosynthesis	5	18	0.28	0.0819119	0.258147	GXYLT1 B4GALT1 ST6GAL1 POGLUT1 GXYLT2
path:hsa04151	PI3K-Akt signaling pathway	70	344	0.2	0.0818215	0.258147	MTCP1 COL6A3 IL7R AKT2 LPAR1 ATF6B TEK PHLPP2 COL4A1 TNC PIK3R3 F2R ITGAV FN1 VEGFC MCL1 SGK3 COL1A2 CSF1R JAK2 CSF3R IL2RB EFNA1 YWHAG OSMR CHUK ITGB1 TLR4 PDGFC GNG10 GNG5 VWF PDGFRA FASLG COL4A2 TP53 CDKN1B LPAR6 YWHAQ ITGA1 MDM2 PIK3CG BRCA1 GNG12 TCL1B ITGB5 EIF4EBP1 LAMB1 CCND1 THBS1 GNB2 FGF13 TLR2 YWHAE GNG11 SPP1 CDK4 KDR COL1A1 KIT CCND2 PDGFRB LAMB2 SGK1 LAMC1 THBS2 COL6A2 IL7 IL6 IGF1
path:hsa00603	Glycosphingolipid biosynthesis - globo and isoglobo series	4	14	0.29	0.0843291	0.263107	ST8SIA1 GBGT1 HEXB NAGA
path:hsa04210	Apoptosis	29	134	0.22	0.0934853	0.288786	CASP2 AKT2 CYCS CTSC GZMB MAPK10 PRF1 CAPN2 TNFRSF1A PARP4 PIK3R3 CTSK MCL1 NFKBIA CHUK FASLG CTSB TUBA1C ATM TP53 MAP3K5 BID CTSO TUBA1B CTSD BCL2A1 FAS TUBA1A TNFSF10
path:hsa05204	Chemical carcinogenesis	14	60	0.23	0.0954111	0.291846	CYP1B1 MGST1 GSTK1 NAT1 HPGDS ADH5 UGT2B17 HSD11B1 GSTM3 MGST3 CBR1 GSTO1 ALDH1A3 GSTM2
path:hsa00640	Propanoate metabolism	8	32	0.25	0.0968832	0.293471	EHHADH BCKDHA DLD ACACA ACSS2 LDHA LDHB ACADM
path:hsa00531	Glycosaminoglycan degradation	5	19	0.26	0.102596	0.303962	HYAL2 HPSE HEXB GLB1 GNS
path:hsa00565	Ether lipid metabolism	9	37	0.24	0.103269	0.303962	ENPP2 PLA2G7 PLD1 PLA2G2D PLA2G4C PLA2G16 AGPS PLA2G4A PLD3
path:hsa04380	Osteoclast differentiation	27	125	0.22	0.101758	0.303962	AKT2 IL1R1 MAPK10 TYROBP IFNGR2 TNFRSF1A LCP2 MITF PIK3R3 CTSK NFKBIA CSF1R FYN CHUK FHL2 RELB CAMK4 IL1B PPP3CC ACP5 FCGR3B LCK TNFRSF11B STAT1 TREM2 NCF2 IFNG
path:hsa00030	Pentose phosphate pathway	7	28	0.25	0.105773	0.308422	TALDO1 ALDOA PGD FBP1 GPI PGM1 G6PD
path:hsa05221	Acute myeloid leukemia	15	66	0.23	0.108521	0.313505	AKT2 CEBPA DUSP6 CD14 PIK3R3 CSF1R TCF7L2 CHUK EIF4EBP1 CCND1 JUP LEF1 BCL2A1 KIT ITGAM
path:hsa04974	Protein digestion and absorption	19	86	0.22	0.111787	0.319977	COL6A3 KCNE3 COL4A1 COL3A1 COL1A2 COL15A1 ATP1B1 SLC3A2 DPP4 SLC7A7 COL4A2 COL5A2 COL5A3 COL1A1 SLC1A1 COL6A2 CPA3 COL11A1 COL5A1
path:hsa04130	SNARE interactions in vesicular transport	8	33	0.24	0.113363	0.321539	VAMP2 STX10 STX16 BNIP1 VTI1B VAMP1 VAMP7 SNAP23
path:hsa00240	Pyrimidine metabolism	20	92	0.22	0.122146	0.340264	POLD1 POLR2A NME3 POLA2 UCK2 POLR1B DCTD POLR2E PNP DPYD DCTPP1 PNPT1 NME1 TK1 DUT TYMP POLE3 ENTPD6 UPP1 RRM2
path:hsa05412	Arrhythmogenic right ventricular cardiomyopathy (ARVC)	16	72	0.22	0.121251	0.340264	RYR2 GJA1 CACNG6 CTNNA2 DSC2 ITGAV TCF7L2 ITGB1 CACNA2D1 DSP DSG2 ITGA1 ITGB5 JUP LEF1 CACNA2D3
path:hsa01212	Fatty acid metabolism	10	43	0.23	0.123416	0.340759	ACSL3 EHHADH PPT1 MECR MCAT HADHB ACACA HADH ACSL1 ACADM
path:hsa00600	Sphingolipid metabolism	8	34	0.24	0.131284	0.359304	SPHK1 ACER3 DEGS2 CERK ASAH1 SGMS1 GLB1 NEU1
path:hsa04310	Wnt signaling pathway	29	139	0.21	0.133489	0.362161	LRP6 MAPK10 PSEN1 FBXW11 DKK1 CTBP2 CTNNBIP1 FZD7 TCF7L2 FZD4 SERPINF1 AXIN1 TP53 RBX1 FZD6 MMP7 DAAM1 PPP3CC RUVBL1 CCND1 LEF1 PRICKLE2 WNT2 CCND2 BAMBI WNT5A FZD2 SFRP4 SFRP2
path:hsa05110	Vibrio cholerae infection	11	49	0.22	0.142269	0.382655	SEC61B SEC61A2 ADCY3 ATP6V1F ATP6V0E1 ATP6V0B ATP6V1B2 TJP2 ATP6AP1 ATP6V1G1 TJP1
path:hsa00290	Valine, leucine and isoleucine biosynthesis	1	4	0.25	0.145618	0.387607	BCAT1
path:hsa03450	Non-homologous end-joining	3	12	0.25	0.146595	0.387607	XRCC5 NHEJ1 POLM
path:hsa00230	Purine metabolism	32	157	0.2	0.155611	0.404589	POLD1 GUCY1B3 POLR2A ITPA PDE7A PAPSS2 IMPDH1 PDE6G ALLC NME3 POLA2 IMPDH2 AK3 POLR1B GUCY1A3 PDE3B ADCY3 ADSL POLR2E AK4 NUDT5 PNP PFAS ATIC ENPP4 PNPT1 NME1 ADA POLE3 PGM1 ENTPD6 RRM2
path:hsa05219	Bladder cancer	9	40	0.22	0.154456	0.404589	MMP9 DAPK1 TP53 MDM2 CCND1 THBS1 TYMP CDK4 MMP1
path:hsa05206	MicroRNAs in cancer	31	152	0.2	0.157657	0.406521	MMP9 VIM CYP1B1 TNC TIMP3 MIR21 MCL1 KIF23 PLAU DNMT1 SPRY2 ABL1 PDGFRA ZEB2 ATM TP53 CDKN1B ZFPM2 IRS2 HMOX1 MDM4 MDM2 BRCA1 EZR CDCA5 CCND1 THBS1 CD44 CCNG1 CCND2 PDGFRB
path:hsa00630	Glyoxylate and dicarboxylate metabolism	6	26	0.23	0.160689	0.407601	ACO1 MDH1 DLD MDH2 GLUL GLDC
path:hsa04924	Renin secretion	14	65	0.22	0.160452	0.407601	GNAQ GUCY1B3 ORAI1 PTGER4 GUCY1A3 PDE3B CLCA2 CTSB GNAI1 PPP3CC AQP1 KCNJ2 PTGER2 CLCA4
path:hsa00120	Primary bile acid biosynthesis	4	17	0.24	0.166671	0.416011	CYP27A1 SCP2 HSD3B7 CH25H
path:hsa00360	Phenylalanine metabolism	4	17	0.24	0.166671	0.416011	MIF GOT2 IL4I1 ALDH1A3
path:hsa00071	Fatty acid degradation	9	41	0.22	0.173897	0.430602	ACSL3 EHHADH ALDH9A1 HADHB ADH5 GCDH HADH ACSL1 ACADM
path:hsa00561	Glycerolipid metabolism	11	51	0.22	0.176329	0.433186	AGPAT5 ALDH9A1 MBOAT2 LIPG DGAT2 MGLL LCLAT1 LPIN1 AGPAT1 MBOAT1 LPL
path:hsa03060	Protein export	5	22	0.23	0.178586	0.435303	IMMP2L SEC61B SEC61A2 SRP68 SRP9
path:hsa05222	Small cell lung cancer	19	92	0.21	0.182805	0.442133	AKT2 CYCS RXRB MAX COL4A1 PIK3R3 ITGAV FN1 NFKBIA CHUK ITGB1 COL4A2 TP53 CDKN1B LAMB1 CCND1 CDK4 LAMB2 LAMC1
path:hsa04966	Collecting duct acid secretion	6	27	0.22	0.185909	0.446182	SLC12A7 CA2 ATP6V1F ATP6V0E1 ATP6V1B2 ATP6V1G1
path:hsa00260	Glycine, serine and threonine metabolism	8	37	0.22	0.193047	0.449863	PGAM1 BHMT DLD GCAT PGAM2 CTH ALAS1 GLDC
path:hsa00510	N-Glycan biosynthesis	10	47	0.21	0.19489	0.449863	DOLPP1 MAN1C1 B4GALT1 MGAT4B ST6GAL1 ALG6 RPN2 MOGS DOLK GANAB
path:hsa03022	Basal transcription factors	9	42	0.21	0.194419	0.449863	GTF2I TAF13 TAF6 TAF3 TAF15 GTF2A2 GTF2H2 TAF7 MNAT1
path:hsa04068	FoxO signaling pathway	26	129	0.2	0.190505	0.449863	IL7R AKT2 MAPK10 PIK3R3 FBXO25 SGK3 IL10 CHUK FASLG ATM CDKN1B IRS2 MDM2 HOMER1 BNIP3 PLK2 CCND1 FBXO32 SOD2 CCNB1 CCND2 TNFSF10 SGK1 S1PR1 IL6 IGF1
path:hsa04611	Platelet activation	24	119	0.2	0.196094	0.449863	GNAQ AKT2 GUCY1B3 ORAI1 FCER1G LCP2 COL3A1 PIK3R3 F2R VASP COL1A2 FYN GUCY1A3 ITGB1 VWF ADCY3 PPP1CC PLA2G4C GNAI1 PIK3CG TLN1 PLA2G4A SNAP23 COL1A1
path:hsa05120	Epithelial cell signaling in Helicobacter pylori infection	14	67	0.21	0.191696	0.449863	PTPRZ1 MAPK10 CCL5 NFKBIA CHUK PAK1 ATP6V1F ATP6V0E1 ATP6V0B ATP6V1B2 ATP6AP1 ATP6V1G1 TJP1 CXCL1
path:hsa04260	Cardiac muscle contraction	15	73	0.21	0.206114	0.469398	RYR2 COX8C MYL2 UQCRC1 CACNG6 UQCR10 ATP1B1 TPM4 UQCRFS1 CYC1 CACNA2D1 COX8A ACTC1 SLC9A6 CACNA2D3
path:hsa00232	Caffeine metabolism	1	5	0.2	0.215135	0.482504	NAT1
path:hsa04330	Notch signaling pathway	10	48	0.21	0.21517	0.482504	PSENEN PSEN1 MAML2 JAG1 CTBP2 DTX3L KAT2A CIR1 MAML1 DTX4
path:hsa05164	Influenza A	32	163	0.2	0.216508	0.482504	AKT2 CYCS MAPK10 MYD88 IL33 IFNGR2 CCL2 TNFRSF1A IL18 CXCL10 PIK3R3 CCL5 NFKBIA JAK2 KPNA2 TLR4 DNAJB1 FASLG IL1B IKBKE PYCARD CASP1 CIITA NXT1 HLA-DOB IL12B FAS STAT1 TNFSF10 HSPA1A IL6 IFNG
path:hsa04931	Insulin resistance	21	105	0.2	0.218425	0.483323	AKT2 NR1H3 MAPK10 TNFRSF1A RPS6KA3 PIK3R3 PRKCQ NFKBIA NR1H2 MGEA5 MLXIP PPP1CC SLC27A1 IRS2 CD36 RPS6KA1 TBC1D4 SLC27A2 PYGL GFPT2 IL6
path:hsa04650	Natural killer cell mediated cytotoxicity	24	122	0.2	0.234524	0.515292	GZMB TYROBP CD247 IFNGR2 PRF1 FCER1G LCP2 HCST PIK3R3 FYN HLA-G FASLG PAK1 PPP3CC BID HLA-C ZAP70 FCGR3B FAS LCK TNFSF10 SH2D1A KLRK1 IFNG
path:hsa01523	Antifolate resistance	6	29	0.21	0.240627	0.525004	CHUK ABCG2 IL1B GGH ATIC IL6
path:hsa04114	Oocyte meiosis	22	112	0.2	0.242709	0.52587	SLK SMC1A RPS6KA3 FBXW11 SPDYE1 PTTG2 CDC23 ESPL1 YWHAG ADCY3 PPP1CC RBX1 YWHAQ PPP3CC RPS6KA1 YWHAE CDK1 CCNB1 MAD2L1 CDC20 PTTG1 IGF1
path:hsa05167	Kaposis sarcoma-associated herpesvirus infection	35	182	0.19	0.249239	0.536294	C3 AKT2 CYCS CCR5 MAPK10 HCK TNFRSF1A PIK3R3 NFKBIA HIF1A JAK2 CHUK GNG10 HLA-G GNG5 PREX1 TP53 IKBKE PIK3CG GNG12 PPP3CC CCR1 BID HLA-C CCND1 GNB2 GNG11 CDK4 FAS CD86 STAT1 CXCL2 CXCL1 CLEC2B IL6
path:hsa00564	Glycerophospholipid metabolism	16	81	0.2	0.252925	0.540497	MBOAT7 AGPAT5 PLD1 PLA2G2D LYPLA2 MBOAT2 LCLAT1 LPIN1 AGPAT1 PLA2G4C PLA2G16 MBOAT1 GPD1L PLA2G4A LYPLA1 PLD3
path:hsa05215	Prostate cancer	19	97	0.2	0.255869	0.543069	AKT2 MMP9 PIK3R3 NFKBIA PLAU TCF7L2 CHUK PDGFC PDGFRA TP53 CDKN1B MDM2 PLAT MMP3 CCND1 LEF1 PDGFRB IL1R2 IGF1
path:hsa00052	Galactose metabolism	6	30	0.2	0.269715	0.552687	B4GALT1 HK1 GALM HK3 PGM1 GLB1
path:hsa00220	Arginine biosynthesis	4	20	0.2	0.269823	0.552687	ARG2 GOT2 GLUL ASS1
path:hsa00450	Selenocompound metabolism	3	15	0.2	0.265158	0.552687	PAPSS2 CTH MTR
path:hsa00563	Glycosylphosphatidylinositol (GPI) - anchor biosynthesis	5	25	0.2	0.270747	0.552687	PIGA PIGU PIGP PIGY PIGK
path:hsa00604	Glycosphingolipid biosynthesis - ganglio series	3	15	0.2	0.265158	0.552687	ST8SIA1 HEXB GLB1
path:hsa04137	Mitophagy - animal	12	61	0.2	0.271029	0.552687	MAPK10 RHOT1 RAB7A SP1 OPTN MITF HIF1A FUNDC1 MRAS TP53 BNIP3 RRAS
path:hsa04932	Non-alcoholic fatty liver disease (NAFLD)	27	141	0.19	0.274353	0.555832	COX8C UQCRC1 AKT2 CYCS NR1H3 CEBPA MAPK10 TNFRSF1A PIK3R3 SDHD UQCR10 NDUFA11 ADIPOR2 MLXIP UQCRFS1 CYC1 NDUFB6 FASLG COX8A IL1B IRS2 MAP3K5 BID FAS NDUFAB1 IL6 ADIPOQ
path:hsa05169	Epstein-Barr virus infection	36	190	0.19	0.278869	0.561336	AKT2 POLR2A VIM MAPK10 TNFAIP3 PIK3R3 NFKBIA PSMC2 NEDD4 IL10 YWHAG CHUK PSMD3 HLA-G RELB POLR2E HSPB1 TP53 IL10RA CDKN1B YWHAQ MDM2 FGR NFKBIE HLA-C PSMD12 RAN PSMD14 CD44 YWHAE ADRM1 CDK1 HSPA1A IL10RB CR2 IFNG
path:hsa05131	Shigellosis	12	62	0.19	0.291729	0.583458	MAPK10 FBXW11 ARPC1B NFKBIA RIPK2 CHUK ITGB1 ABL1 RHOG NOD2 CD44 PFN2
path:hsa00100	Steroid biosynthesis	3	16	0.19	0.308074	0.589688	DHCR24 CYP27B1 LIPA
path:hsa00410	beta-Alanine metabolism	6	31	0.19	0.299666	0.589688	EHHADH CNDP1 ALDH9A1 DPYD ALDH1A3 ACADM
path:hsa00430	Taurine and hypotaurine metabolism	2	11	0.18	0.304526	0.589688	ADO CDO1
path:hsa00592	alpha-Linolenic acid metabolism	4	21	0.19	0.306917	0.589688	PLA2G2D PLA2G4C PLA2G16 PLA2G4A
path:hsa03008	Ribosome biogenesis in eukaryotes	13	68	0.19	0.306239	0.589688	REXO1 RPP40 POP1 NOP58 RIOK1 POP4 NOB1 UTP14C POP7 NOP10 RAN NXT1 EMG1
path:hsa04540	Gap junction	16	84	0.19	0.306077	0.589688	GNAQ GJA1 GUCY1B3 LPAR1 TUBB6 GUCY1A3 PDGFC ADCY3 PDGFRA TUBA1C GNAI1 TUBA1B CDK1 PDGFRB TJP1 TUBA1A
path:hsa04621	NOD-like receptor signaling pathway	30	159	0.19	0.297985	0.589688	MAPK10 MYD88 CCL2 IL18 TNFAIP3 CCL5 TMEM173 CARD6 NFKBIA RIPK2 GBP3 CHUK TLR4 GBP2 GBP1 CTSB IL1B IKBKE CYBB NOD2 NAMPT PYCARD CASP1 NLRP7 TXN STAT1 CXCL2 CXCL1 GBP5 IL6
path:hsa05216	Thyroid cancer	7	37	0.19	0.32326	0.614982	RXRB TCF7L2 NCOA4 TP53 TPR CCND1 LEF1
path:hsa04612	Antigen processing and presentation	13	69	0.19	0.326769	0.61789	CD8A HLA-G LGMN CD74 CD4 CTSB HLA-C CIITA HLA-DOB RFXANK HSPA1A CD8B IFNG
path:hsa00310	Lysine degradation	8	43	0.19	0.343102	0.61974	BBOX1 PRDM2 EHHADH ALDH9A1 GCDH PLOD2 HADH PLOD1
path:hsa00340	Histidine metabolism	4	22	0.18	0.344661	0.61974	HNMT CNDP1 ALDH9A1 ALDH1A3
path:hsa00511	Other glycan degradation	3	17	0.18	0.351583	0.61974	HEXB GLB1 NEU1
path:hsa00515	Mannose type O-glycan biosynthesis	3	17	0.18	0.351583	0.61974	FKTN B4GALT1 FUT4
path:hsa00760	Nicotinate and nicotinamide metabolism	4	22	0.18	0.344661	0.61974	NNMT PNP NAMPT AOX1
path:hsa00970	Aminoacyl-tRNA biosynthesis	8	43	0.19	0.343102	0.61974	NARS FARSB KARS TARS VARS2 RARS NARS2 WARS
path:hsa01210	2-Oxocarboxylic acid metabolism	3	17	0.18	0.351583	0.61974	ACO1 GOT2 BCAT1
path:hsa04350	TGF-beta signaling pathway	15	81	0.19	0.351219	0.61974	SMAD1 ACVR1 ID2 SP1 ID1 SMAD7 DCN BMP2 NBL1 RBX1 THBS1 BMPR1A BAMBI E2F5 IFNG
path:hsa04530	Tight junction	30	162	0.19	0.337981	0.61974	MYH2 MYH1 MYL2 MAPK10 ACTN1 VASP PCNA MPDZ TIAM1 CGNL1 NEDD4 ITGB1 AMOTL2 RAP2C TUBA1C CLDN20 MAP3K5 ACTR2 EZR MYH3 CCND1 TJP2 MYH10 TUBA1B CDK4 MAP3K1 TJP1 TUBA1A ARHGAP17 CD1B
path:hsa04614	Renin-angiotensin system	4	22	0.18	0.344661	0.61974	NLN THOP1 CTSA CPA3
path:hsa05161	Hepatitis B	26	140	0.19	0.336308	0.61974	DDB1 AKT2 CYCS MMP9 MAPK10 MYD88 ATF6B STAT4 PIK3R3 NFKBIA PCNA CHUK TLR4 FASLG TP53 CDKN1B YWHAQ IKBKE CCND1 TLR2 ATP6AP1 CDK4 FAS MAP3K1 STAT1 IL6
path:hsa05231	Choline metabolism in cancer	17	91	0.19	0.335532	0.61974	AKT2 MAPK10 PLD1 SP1 PIK3R3 HIF1A PIP5K1A PDGFC WASF3 PDGFRA PLA2G4C SLC44A2 EIF4EBP1 RALGDS PLA2G4A LYPLA1 PDGFRB
path:hsa04122	Sulfur relay system	1	7	0.14	0.357463	0.626564	TST
path:hsa04370	VEGF signaling pathway	10	55	0.18	0.375145	0.653884	AKT2 SPHK1 SH2D2A PIK3R3 HSPB1 PLA2G4C PPP3CC MAPKAPK3 PLA2G4A KDR
path:hsa03040	Spliceosome	22	121	0.18	0.381662	0.655989	SNRPB HNRNPU U2AF2 DDX23 CDC5L TXNL4A PHF5A DDX46 SRSF4 CRNKL1 EIF4A3 SRSF5 SF3B5 SF3B4 PLRG1 DHX15 PRPF19 PPIL1 ACIN1 PRPF8 TCERG1 HSPA1A
path:hsa04071	Sphingolipid signaling pathway	20	110	0.18	0.381823	0.655989	GNAQ AKT2 S1PR3 MAPK10 PLD1 SPHK1 FCER1G TNFRSF1A PIK3R3 DEGS2 FYN ASAH1 TP53 MAP3K5 GNAI1 SGMS1 BID CTSD ADORA3 S1PR1
path:hsa04964	Proximal tubule bicarbonate reclamation	4	23	0.17	0.38266	0.655989	MDH1 ATP1B1 CA2 AQP1
path:hsa05203	Viral carcinogenesis	34	188	0.18	0.390688	0.666091	DDB1 C3 CCR5 ATF6B ACTN1 HDAC3 PIK3R3 NFKBIA KAT2A YWHAG HIST1H4E HLA-G DNAJA3 GTF2A2 HIST1H4C TP53 CDKN1B YWHAQ HIST1H2BK GTF2H2 MDM2 HIST1H4H HLA-C CCND1 POLB HIST1H4B YWHAE CDK1 CHEK1 CDK4 CCND2 HIST1H2BI CDC20 HIST1H2BF
path:hsa00670	One carbon pool by folate	3	18	0.17	0.3951	0.666331	MTHFD1 MTR ATIC
path:hsa00770	Pantothenate and CoA biosynthesis	3	18	0.17	0.3951	0.666331	VNN1 DPYD BCAT1
path:hsa04622	RIG-I-like receptor signaling pathway	12	67	0.18	0.400427	0.671684	MAPK10 SIKE1 CXCL10 TMEM173 NFKBIA CHUK PIN1 RNF125 IKBKE IL12B MAP3K1 ISG15
path:hsa00250	Alanine, aspartate and glutamate metabolism	6	35	0.17	0.423733	0.674566	GOT2 GLUL ADSL IL4I1 ASS1 GFPT2
path:hsa00350	Tyrosine metabolism	6	35	0.17	0.423733	0.674566	MIF GOT2 ADH5 IL4I1 AOX1 ALDH1A3
path:hsa00534	Glycosaminoglycan biosynthesis - heparan sulfate / heparin	4	24	0.17	0.42055	0.674566	HS3ST3A1 EXTL2 HS3ST2 EXT2
path:hsa04010	MAPK signaling pathway	51	285	0.18	0.416979	0.674566	AKT2 CACNG6 IL1R1 MAPK10 MYD88 TEK DUSP6 DUSP2 MAX TNFRSF1A RPS6KA3 CD14 VEGFC CSF1R EFNA1 CHUK MAP3K4 PDGFC DUSP5 RELB MRAS PDGFRA CACNA2D1 MKNK1 FASLG HSPB1 PAK1 TP53 PLA2G4C ARRB1 IL1B MAP3K5 FLNA GNG12 PPP3CC MAPKAPK3 RPS6KA1 RASA1 DUSP3 MKNK2 FGF13 PLA2G4A CACNA2D3 RRAS FAS KDR MAP3K1 KIT PDGFRB HSPA1A IGF1
path:hsa04141	Protein processing in endoplasmic reticulum	28	156	0.18	0.40914	0.674566	UBE2D4 FBXO6 SEC61B MAPK10 ATF6B CAPN2 UBE4B HSPBP1 STUB1 MARCH6 MAN1C1 CRYAB NPLOC4 SEC61A2 VCP DNAJB1 DNAJC5B UBE2D1 RBX1 DNAJA2 MAP3K5 RPN2 MOGS EDEM1 GANAB SSR4 HSPA1A HYOU1
path:hsa04218	Cellular senescence	28	157	0.18	0.423766	0.674566	AKT2 HIPK3 HUS1 CAPN2 IGFBP3 PIK3R3 FBXW11 HLA-G MRAS MYBL2 PPP1CC ATM TP53 MDM2 ETS1 PPP3CC EIF4EBP1 HLA-C CCND1 RRAS CDK1 CHEK1 CDK4 CCNB1 CCND2 E2F5 SERPINE1 IL6
path:hsa04371	Apelin signaling pathway	24	134	0.18	0.412706	0.674566	GNAQ RYR2 MYL2 AKT2 SPHK1 JAG1 PDE3B APLNR GNG10 GNG5 MRAS CAMK4 ADCY3 GNAI1 PIK3CG PLAT GNG12 CCND1 GNB2 GNG11 RRAS SPP1 CTGF SERPINE1
path:hsa05010	Alzheimers disease	29	162	0.18	0.415434	0.674566	GNAQ COX8C UQCRC1 CYCS PSENEN PSEN1 CAPN2 TNFRSF1A SDHD UQCR10 NDUFA11 HSD17B10 UQCRFS1 CYC1 NDUFB6 NAE1 COX8A IL1B ATP2A3 APOE GAPDH APP PPP3CC BID ATP5B FAS NDUFAB1 BACE2 LPL
path:hsa05014	Amyotrophic lateral sclerosis (ALS)	9	51	0.18	0.411327	0.674566	CYCS GPX1 TNFRSF1A TP53 TNFRSF1B MAP3K5 PPP3CC BID CASP1
path:hsa05217	Basal cell carcinoma	11	62	0.18	0.411666	0.674566	FZD7 TCF7L2 FZD4 AXIN1 BMP2 TP53 FZD6 LEF1 WNT2 WNT5A FZD2
path:hsa00020	Citrate cycle (TCA cycle)	5	30	0.17	0.439587	0.696199	ACO1 MDH1 SDHD DLD MDH2
path:hsa04072	Phospholipase D signaling pathway	24	136	0.18	0.444342	0.697621	AKT2 LPAR1 AGPAT5 PLD1 SPHK1 FCER1G PIK3R3 F2R CYTH1 FYN PIP5K1A PDGFC MRAS ADCY3 PDGFRA AGPAT1 PLA2G4C LPAR6 PIK3CG RALGDS PLA2G4A RRAS KIT PDGFRB
path:hsa04917	Prolactin signaling pathway	12	69	0.17	0.444957	0.697621	AKT2 MAPK10 PIK3R3 SOCS7 JAK2 SOCS5 SOCS2 CCND1 CISH CCND2 IRF1 STAT1
path:hsa00053	Ascorbate and aldarate metabolism	2	14	0.14	0.459857	0.69988	ALDH9A1 UGT2B17
path:hsa00533	Glycosaminoglycan biosynthesis - keratan sulfate	2	14	0.14	0.459857	0.69988	B4GALT1 CHST2
path:hsa00591	Linoleic acid metabolism	4	25	0.16	0.458001	0.69988	PLA2G2D PLA2G4C PLA2G16 PLA2G4A
path:hsa00790	Folate biosynthesis	4	25	0.16	0.458001	0.69988	SPR GGH CBR1 AKR1C3
path:hsa04150	mTOR signaling pathway	25	142	0.18	0.450572	0.69988	FNIP2 LRP6 AKT2 TNFRSF1A RPS6KA3 PIK3R3 RRAGD FZD7 SLC3A2 CHUK FZD4 STRADB LPIN1 FZD6 ATP6V1F SLC7A5 RPS6KA1 EIF4EBP1 ATP6V1B2 ATP6V1G1 WNT2 SGK1 WNT5A FZD2 IGF1
path:hsa04975	Fat digestion and absorption	6	36	0.17	0.454781	0.69988	PLA2G2D GOT2 DGAT2 AGPAT1 ABCA1 CD36
path:hsa04662	B cell receptor signaling pathway	12	70	0.17	0.46716	0.707543	AKT2 PIK3R3 IFITM1 NFKBIA CHUK INPPL1 NFKBIE PPP3CC CD22 CD81 CD79A CR2
path:hsa00532	Glycosaminoglycan biosynthesis - chondroitin sulfate / dermatan sulfate	3	20	0.15	0.480187	0.714465	CHST14 CSGALNACT1 CHST7
path:hsa01522	Endocrine resistance	16	93	0.17	0.477622	0.714465	AKT2 MMP9 MAPK10 SP1 PIK3R3 JAG1 ADCY3 TP53 CDKN1B MDM2 NCOA3 CCND1 CDKN2C BIK CDK4 IGF1
path:hsa03010	Ribosome	22	127	0.17	0.48054	0.714465	RPLP0 RPS27 RPLP1 MRPL34 MRPL32 MRPL3 RPL7A RPS2 MRPS18C RPLP2 MRPL17 RPL29 MRPL27 MRPS15 RPS11 MRPL15 RPS24 RPL36 RPL38 RPS26 MRPL13 RPS4Y1
path:hsa04666	Fc gamma R-mediated phagocytosis	14	82	0.17	0.483075	0.714465	AKT2 LIMK1 PLD1 ASAP2 HCK SPHK1 PIK3R3 VASP ARPC1B PIP5K1A WASF3 PAK1 INPPL1 PLA2G4A
path:hsa04919	Thyroid hormone signaling pathway	20	116	0.17	0.485463	0.714465	AKT2 SIN3A RXRB PLCD1 HDAC3 PIK3R3 ITGAV MED17 ATP1B1 HIF1A KAT2A MED4 MED24 TP53 MDM2 NCOA3 RCAN2 CCND1 TBC1D4 STAT1
path:hsa04960	Aldosterone-regulated sodium reabsorption	6	37	0.16	0.48547	0.714465	PIK3R3 ATP1B1 NR3C2 SGK1 SFN IGF1
path:hsa04923	Regulation of lipolysis in adipocytes	9	54	0.17	0.487837	0.714578	AKT2 PIK3R3 PDE3B MGLL ADCY3 PLA2G16 IRS2 GNAI1 FABP4
path:hsa05210	Colorectal cancer	12	72	0.17	0.511109	0.745168	AKT2 CYCS MAPK10 MLH1 PIK3R3 TCF7L2 AXIN1 APPL1 TP53 CCND1 RALGDS LEF1
path:hsa04550	Signaling pathways regulating pluripotency of stem cells	23	135	0.17	0.518288	0.751241	SKIL AKT2 SMAD1 TCF3 ACVR1 ID2 PIK3R3 LIFR JAK2 FZD7 SMARCAD1 FZD4 PCGF5 AXIN1 ID1 PCGF6 FZD6 LIF BMPR1A WNT2 WNT5A FZD2 IGF1
path:hsa04721	Synaptic vesicle cycle	10	61	0.16	0.52009	0.751241	VAMP2 AP2S1 ATP6V1F ATP6V0E1 ATP6V0B ATP6V1B2 UNC13B STXBP1 AP2A2 ATP6V1G1
path:hsa04930	Type II diabetes mellitus	7	44	0.16	0.523816	0.753136	MAPK10 PIK3R3 HK1 SOCS2 IRS2 HK3 ADIPOQ
path:hsa00601	Glycosphingolipid biosynthesis - lacto and neolacto series	4	27	0.15	0.53047	0.755738	B3GNT4 B4GALT1 ST8SIA1 FUT4
path:hsa05310	Asthma	4	27	0.15	0.53047	0.755738	FCER1G IL10 HLA-DOB IL9
path:hsa04146	Peroxisome	13	79	0.16	0.538366	0.763501	ACSL3 EHHADH GSTK1 DECR2 PEX12 SCP2 AGPS ACSL1 PHYH PEX11B SLC27A2 SOD2 PRDX1
path:hsa04144	Endocytosis	39	228	0.17	0.54225	0.765529	CCR5 DAB2 DNAJC6 PDCD6IP PLD1 ASAP2 SH3GL2 RAB7A ARF5 TSG101 VPS26A CYTH1 ARPC1B STAM ACAP2 CAV1 AP2S1 NEDD4 IL2RB PIP5K1A VPS25 CAV2 HLA-G PDGFRA SNX6 WWP1 ARFGAP2 ARRB1 EHD2 MDM2 VPS28 HLA-C PSD4 AP2A2 RAB31 PSD3 HGS SMAP1 HSPA1A
path:hsa00830	Retinol metabolism	7	45	0.16	0.551202	0.774662	CYP26A1 DHRS3 ADH5 UGT2B17 ALDH1A1 SDR16C5 AOX1
path:hsa03018	RNA degradation	12	74	0.16	0.554046	0.775167	EXOSC3 DCP1B PATL1 C1D EDC4 CNOT3 EXOSC5 WDR61 DDX6 CNOT6L PNPT1 ENO1
path:hsa04014	Ras signaling pathway	38	224	0.17	0.563278	0.777623	RGL1 AKT2 MAPK10 PLD1 TEK PIK3R3 PLA2G2D VEGFC CSF1R TIAM1 EFNA1 CHUK PDGFC GNG10 GNG5 MRAS ABL1 PDGFRA FASLG PAK1 PLA2G4C PLA2G16 ETS1 GNG12 PLA1A PAK3 RASA1 ZAP70 RALGDS GNB2 FGF13 PLA2G4A GNG11 RRAS KDR KIT PDGFRB IGF1
path:hsa04724	Glutamatergic synapse	18	109	0.17	0.561985	0.777623	GNAQ PLD1 TRPC1 GNG10 GNG5 SHANK3 ADCY3 GLUL PLA2G4C SLC1A3 GNAI1 HOMER1 GNG12 PPP3CC GNB2 PLA2G4A GNG11 SLC1A1
path:hsa04977	Vitamin digestion and absorption	3	22	0.14	0.560133	0.777623	MMACHC TCN2 SLC19A2
path:hsa04913	Ovarian steroidogenesis	7	46	0.15	0.577913	0.794312	CYP1B1 GDF9 ADCY3 PLA2G4C PLA2G4A AKR1C3 IGF1
path:hsa04211	Longevity regulating pathway	14	87	0.16	0.582697	0.797375	AKT2 ATF6B PIK3R3 ADIPOR2 CAMK4 ADCY3 APPL1 SESN1 TP53 IRS2 EIF4EBP1 SOD2 IGF1 ADIPOQ
path:hsa05213	Endometrial cancer	9	58	0.16	0.585416	0.797597	AKT2 CTNNA2 MLH1 PIK3R3 TCF7L2 AXIN1 TP53 CCND1 LEF1
path:hsa00190	Oxidative phosphorylation	19	117	0.16	0.599365	0.798866	COX8C UQCRC1 SDHD UQCR10 PPA2 NDUFA11 PPA1 UQCRFS1 CYC1 NDUFB6 COX8A ATP6V1F ATP6V0E1 ATP6V0B ATP6V1B2 ATP5B ATP6AP1 ATP6V1G1 NDUFAB1
path:hsa00910	Nitrogen metabolism	2	17	0.12	0.598335	0.798866	GLUL CA2
path:hsa04710	Circadian rhythm	4	29	0.14	0.598247	0.798866	CRY1 FBXW11 RBX1 BHLHE40
path:hsa04722	Neurotrophin signaling pathway	19	117	0.16	0.599365	0.798866	AKT2 MAPK10 PSEN1 RPS6KA3 PIK3R3 NFKBIA RIPK2 SH2B3 SORT1 CAMK4 ABL1 FASLG TP53 MAP3K5 NFKBIE RPS6KA1 IRAK3 YWHAE MAP3K1
path:hsa04914	Progesterone-mediated oocyte maturation	14	88	0.16	0.60171	0.798866	AKT2 MAPK10 RPS6KA3 PIK3R3 SPDYE1 CDC23 PDE3B ADCY3 GNAI1 RPS6KA1 CDK1 CCNB1 MAD2L1 IGF1
path:hsa05218	Melanoma	12	76	0.16	0.595542	0.798866	AKT2 MITF PIK3R3 PDGFC PDGFRA TP53 MDM2 CCND1 FGF13 CDK4 PDGFRB IGF1
path:hsa04670	Leukocyte transendothelial migration	17	106	0.16	0.610284	0.804186	VCAM1 MYL2 MMP9 ITK CTNNA2 ACTN1 CXCL12 PIK3R3 VASP ITGB1 THY1 CLDN20 GNAI1 CYBB EZR ITGAM NCF2
path:hsa05211	Renal cell carcinoma	10	65	0.15	0.610872	0.804186	AKT2 PIK3R3 HIF1A EPAS1 ARNT2 PAK1 RBX1 ETS1 PAK3 EGLN3
path:hsa04750	Inflammatory mediator regulation of TRP channels	14	89	0.16	0.620332	0.809806	GNAQ IL1R1 MAPK10 PTGER4 PIK3R3 PRKCQ PRKCH ADCY3 PPP1CC PLA2G4C IL1B PTGER2 PLA2G4A IGF1
path:hsa05410	Hypertrophic cardiomyopathy (HCM)	13	83	0.16	0.617995	0.809806	RYR2 MYL2 CACNG6 ITGAV TPM4 ITGB1 CACNA2D1 ACTC1 ITGA1 ITGB5 CACNA2D3 IL6 IGF1
path:hsa04520	Adherens junction	10	66	0.15	0.632235	0.821906	CTNNA2 SSX2IP ACTN1 PTPRM TCF7L2 FYN WASF3 LEF1 SNAI2 TJP1
path:hsa04360	Axon guidance	28	172	0.16	0.636901	0.824536	SEMA5B SEMA5A LIMK1 ROBO1 EFNB3 CXCL12 PIK3R3 EPHB1 TRPC1 NTN4 EFNA1 FYN ITGB1 SLIT2 ABL1 PAK1 SEMA4C EFNB2 GNAI1 PPP3CC PAK3 DPYSL2 RASA1 FES RRAS ABLIM1 WNT5A SEMA3C
path:hsa00562	Inositol phosphate metabolism	11	73	0.15	0.653546	0.842588	INPP5E INPP5K IMPA1 PLCD1 PIP5K1A MINPP1 TPI1 INPP4B INPPL1 PIK3CG PIP4K2A
path:hsa04973	Carbohydrate digestion and absorption	5	37	0.14	0.656504	0.842919	AKT2 PIK3R3 ATP1B1 HK1 HK3
path:hsa04215	Apoptosis - multiple species	4	31	0.13	0.660134	0.844106	CYCS MAPK10 TNFRSF1A BID
path:hsa00040	Pentose and glucuronate interconversions	2	19	0.11	0.676645	0.861687	UGT2B17 CRYL1
path:hsa04015	Rap1 signaling pathway	33	205	0.16	0.682401	0.865484	GNAQ FYB AKT2 LPAR1 FPR1 TEK SIPA1L2 LCP2 PIK3R3 F2R VASP VEGFC CSF1R TIAM1 EFNA1 ITGB1 PDGFC ID1 MRAS ADCY3 PDGFRA GNAI1 TLN1 RALGDS THBS1 FGF13 RRAS KDR KIT PDGFRB ITGAM PFN2 IGF1
path:hsa00730	Thiamine metabolism	1	13	0.077	0.696384	0.876096	AK4
path:hsa04810	Regulation of actin cytoskeleton	33	206	0.16	0.693697	0.876096	CYFIP1 MYL2 NCKAP1 IQGAP2 LIMK1 ACTN1 CD14 PIK3R3 F2R ITGAV FN1 ARPC1B SPATA13 TIAM1 PIP5K1A ITGB1 PDGFC MRAS PDGFRA PPP1CC PAK1 ITGA1 GNG12 EZR ITGB5 PAK3 FGF13 MYH10 RRAS PDGFRB ITGAM PIP4K2A PFN2
path:hsa05034	Alcoholism	24	154	0.16	0.708608	0.884343	ATF6B HDAC3 HIST1H4E GNG10 HIST2H2AA3 GNG5 CAMK4 PPP1CC HIST1H4C HIST1H2AC HIST1H2BK GNAI1 HIST1H4H GNG12 GNB2 HIST1H4B GNG11 HIST3H2A HIST1H2BI HIST1H2AJ HIST1H2AI HIST1H3I HIST1H2BF HIST1H2AE
path:hsa05224	Breast cancer	23	148	0.16	0.708009	0.884343	LRP6 AKT2 SP1 PIK3R3 JAG1 FZD7 TCF7L2 FZD4 AXIN1 TP53 FZD6 HEY1 BRCA1 NCOA3 CCND1 LEF1 FGF13 WNT2 CDK4 KIT WNT5A FZD2 IGF1
path:hsa01521	EGFR tyrosine kinase inhibitor resistance	11	77	0.14	0.726728	0.896202	AKT2 PIK3R3 JAK2 PDGFC PDGFRA AXL EIF4EBP1 KDR PDGFRB IL6 IGF1
path:hsa05220	Chronic myeloid leukemia	11	77	0.14	0.726728	0.896202	AKT2 PIK3R3 NFKBIA CTBP2 CHUK ABL1 TP53 CDKN1B MDM2 CCND1 CDK4
path:hsa05414	Dilated cardiomyopathy (DCM)	13	89	0.15	0.723467	0.896202	RYR2 MYL2 CACNG6 ITGAV TPM4 ITGB1 ADCY3 CACNA2D1 ACTC1 ITGA1 ITGB5 CACNA2D3 IGF1
path:hsa04970	Salivary secretion	12	85	0.14	0.75651	0.929256	GNAQ LYZ GUCY1B3 HTN3 HTN1 VAMP2 STATH CST3 ATP1B1 GUCY1A3 ATP2B4 ADCY3
path:hsa04213	Longevity regulating pathway - multiple species	8	61	0.13	0.771631	0.944113	AKT2 PIK3R3 CRYAB ADCY3 IRS2 SOD2 HSPA1A IGF1
path:hsa05100	Bacterial invasion of epithelial cells	10	74	0.14	0.778363	0.94863	CTNNA2 PIK3R3 FN1 ARPC1B CAV1 ITGB1 CAV2 SEPT8 RHOG SEPT6
path:hsa04730	Long-term depression	7	56	0.12	0.794778	0.961127	GNAQ GUCY1B3 GUCY1A3 PLA2G4C GNAI1 PLA2G4A IGF1
path:hsa05212	Pancreatic cancer	10	75	0.13	0.793304	0.961127	AKT2 MAPK10 PLD1 PIK3R3 CHUK TP53 CCND1 RALGDS CDK4 STAT1
path:hsa03020	RNA polymerase	3	30	0.1	0.80089	0.964779	POLR2A POLR1B POLR2E
path:hsa04664	Fc epsilon RI signaling pathway	8	63	0.13	0.804001	0.964801	AKT2 MAPK10 FCER1G LCP2 PIK3R3 FYN PLA2G4C PLA2G4A
path:hsa00140	Steroid hormone biosynthesis	5	44	0.11	0.812521	0.96782	CYP1B1 SRD5A3 UGT2B17 HSD11B1 AKR1C3
path:hsa05214	Glioma	9	70	0.13	0.812721	0.96782	AKT2 PIK3R3 PDGFRA TP53 MDM2 CCND1 CDK4 PDGFRB IGF1
path:hsa01040	Biosynthesis of unsaturated fatty acids	1	17	0.059	0.82873	0.983132	ACOT4
path:hsa04972	Pancreatic secretion	12	91	0.13	0.836128	0.988151	GNAQ RYR2 PLA2G2D TRPC1 ATP1B1 CLCA2 ATP2B4 ADCY3 CA2 ATP2A3 CLCA4 CPA3
path:hsa00650	Butanoate metabolism	2	25	0.08	0.842887	0.99238	EHHADH HADH
path:hsa04725	Cholinergic synapse	15	111	0.14	0.846313	0.992668	GNAQ AKT2 PIK3R3 JAK2 FYN GNG10 GNG5 CAMK4 ADCY3 GNAI1 PIK3CG GNG12 GNB2 KCNJ2 GNG11
path:hsa00512	Mucin type O-glycan biosynthesis	2	26	0.077	0.861867	0.999998	GALNT7 B4GALT5
path:hsa00900	Terpenoid backbone biosynthesis	1	22	0.045	0.920176	0.999998	ZMPSTE24
path:hsa02010	ABC transporters	3	43	0.07	0.959063	0.999998	ABCG1 ABCG2 ABCA1
path:hsa03015	mRNA surveillance pathway	8	83	0.096	0.968436	0.999998	ETF1 FIP1L1 CSTF2T SMG7 EIF4A3 PPP1CC ACIN1 NXT1
path:hsa04012	ErbB signaling pathway	8	83	0.096	0.968436	0.999998	AKT2 MAPK10 PIK3R3 ABL1 PAK1 CDKN1B EIF4EBP1 PAK3
path:hsa04020	Calcium signaling pathway	17	178	0.096	0.998272	0.999998	GNAQ RYR2 TNNC2 ORAI1 SPHK1 PLCD1 F2R GRPR GNA15 ATP2B4 CAMK4 ADCY3 PDGFRA ATP2A3 PPP3CC PPIF PDGFRB
path:hsa04022	cGMP-PKG signaling pathway	22	161	0.14	0.89215	0.999998	GNAQ AKT2 GUCY1B3 GTF2I ATF6B VASP ATP1B1 GUCY1A3 PDE3B ATP2B4 ADCY3 PPP1CC IRS2 ATP2A3 GNAI1 ADRA2A PIK3CG PPP3CC PPIF KCNMB4 ADORA3 KCNJ8
path:hsa04024	cAMP signaling pathway	21	191	0.11	0.992586	0.999998	RYR2 AKT2 MAPK10 PLD1 ORAI1 PIK3R3 F2R SSTR5 NFKBIA ATP1B1 TIAM1 PDE3B ATP2B4 CAMK4 ADCY3 PPP1CC PAK1 GNAI1 PTGER2 RRAS SUCNR1
path:hsa04070	Phosphatidylinositol signaling system	11	98	0.11	0.943591	0.999998	INPP5E INPP5K IMPA1 PLCD1 PIK3R3 PPIP5K2 PIP5K1A INPP4B TMEM55A INPPL1 PIP4K2A
path:hsa04080	Neuroactive ligand-receptor interaction	23	269	0.086	0.999985	0.999998	GABRB2 LPAR1 S1PR3 GZMA FPR1 P2RY14 PTGER4 F2R SSTR5 GRPR TSPO C5AR1 P2RY13 APLNR LPAR6 ADRA2A FPR3 C3AR1 PTGER2 KISS1R ADORA3 P2RY8 S1PR1
path:hsa04136	Autophagy - other	1	29	0.034	0.974134	0.999998	ATG4D
path:hsa04140	Autophagy - animal	16	120	0.13	0.870666	0.999998	AKT2 ATG4D MAPK10 LAMP2 RAB7A PIK3R3 PRKCQ RRAGD HIF1A DAPK1 MRAS CTSB IRS2 BNIP3 RRAS CTSD
path:hsa04152	AMPK signaling pathway	12	118	0.1	0.982786	0.999998	AKT2 PIK3R3 ADIPOR2 ACACA STRADB IRS2 CD36 EIF4EBP1 CCND1 FBP1 IGF1 ADIPOQ
path:hsa04261	Adrenergic signaling in cardiomyocytes	16	144	0.11	0.979057	0.999998	GNAQ RYR2 MYL2 AKT2 CACNG6 ATF6B ATP1B1 TPM4 ATP2B4 ADCY3 CACNA2D1 PPP1CC ACTC1 GNAI1 PIK3CG CACNA2D3
path:hsa04270	Vascular smooth muscle contraction	13	116	0.11	0.960968	0.999998	GNAQ GUCY1B3 RAMP3 PRKCQ PLA2G2D GUCY1A3 CALD1 PRKCH ADCY3 PPP1CC PLA2G4C PLA2G4A KCNMB4
path:hsa04340	Hedgehog signaling pathway	4	43	0.093	0.897422	0.999998	FBXW11 ARRB1 CCND1 CCND2
path:hsa04713	Circadian entrainment	11	96	0.11	0.93303	0.999998	GNAQ RYR2 GUCY1B3 GUCY1A3 GNG10 GNG5 ADCY3 GNAI1 GNG12 GNB2 GNG11
path:hsa04720	Long-term potentiation	6	67	0.09	0.963729	0.999998	GNAQ RPS6KA3 CAMK4 PPP1CC PPP3CC RPS6KA1
path:hsa04723	Retrograde endocannabinoid signaling	14	138	0.1	0.989929	0.999998	GNAQ GABRB2 MAPK10 NDUFA11 GNG10 GNG5 MGLL ADCY3 NDUFB6 GNAI1 GNG12 GNB2 GNG11 NDUFAB1
path:hsa04726	Serotonergic synapse	13	107	0.12	0.918587	0.999998	GNAQ GABRB2 TRPC1 GNG10 GNG5 PLA2G4C GNAI1 GNG12 APP HTR3A GNB2 PLA2G4A GNG11
path:hsa04727	GABAergic synapse	10	87	0.11	0.919071	0.999998	GABRB2 SLC38A5 GNG10 GNG5 ADCY3 GLUL GNAI1 GNG12 GNB2 GNG11
path:hsa04728	Dopaminergic synapse	13	130	0.1	0.989146	0.999998	GNAQ AKT2 MAPK10 ATF6B CALY GNG10 GNG5 PPP1CC GNAI1 GNG12 PPP3CC GNB2 GNG11
path:hsa04740	Olfactory transduction	4	117	0.034	0.999998	0.999998	OR2B6 OR51E1 ADCY3 ARRB1
path:hsa04742	Taste transduction	3	71	0.042	0.999295	0.999998	SCN2A CALHM1 HTR3A
path:hsa04744	Phototransduction	2	28	0.071	0.893862	0.999998	PDE6G SLC24A1
path:hsa04910	Insulin signaling pathway	18	136	0.13	0.895228	0.999998	AKT2 MAPK10 INPP5K PIK3R3 PRKAR2B HK1 PDE3B ACACA PPP1CC MKNK1 SOCS2 INPPL1 IRS2 EIF4EBP1 HK3 MKNK2 FBP1 PYGL
path:hsa04911	Insulin secretion	8	84	0.095	0.971537	0.999998	GNAQ RYR2 ATF6B TRPM4 VAMP2 ATP1B1 ADCY3 KCNMB4
path:hsa04912	GnRH signaling pathway	9	89	0.1	0.964374	0.999998	GNAQ MAPK10 PLD1 MAP3K4 ADCY3 PLA2G4C MMP14 PLA2G4A MAP3K1
path:hsa04915	Estrogen signaling pathway	9	95	0.095	0.980546	0.999998	GNAQ AKT2 MMP9 ATF6B SP1 PIK3R3 ADCY3 GNAI1 HSPA1A
path:hsa04916	Melanogenesis	13	100	0.13	0.863393	0.999998	GNAQ MITF FZD7 TCF7L2 FZD4 ADCY3 FZD6 GNAI1 LEF1 WNT2 KIT WNT5A FZD2
path:hsa04918	Thyroid hormone synthesis	7	73	0.096	0.958097	0.999998	GNAQ GPX1 ATF6B ATP1B1 ADCY3 GPX8 GPX3
path:hsa04921	Oxytocin signaling pathway	18	149	0.12	0.958151	0.999998	GNAQ RYR2 GUCY1B3 CACNG6 GUCY1A3 CAMK4 ADCY3 CACNA2D1 PPP1CC PLA2G4C GNAI1 PIK3CG PPP3CC CCND1 CAMK1 KCNJ2 PLA2G4A CACNA2D3
path:hsa04922	Glucagon signaling pathway	12	97	0.12	0.894243	0.999998	GNAQ AKT2 PGAM1 PGAM2 PDE3B ACACA PPP4C LDHA PPP3CC LDHB FBP1 PYGL
path:hsa04925	Aldosterone synthesis and secretion	6	82	0.073	0.993849	0.999998	GNAQ ATF6B ORAI1 CAMK4 ADCY3 CAMK1
path:hsa04961	Endocrine and other factor-regulated calcium reabsorption	4	47	0.085	0.935114	0.999998	GNAQ ATP1B1 AP2S1 AP2A2
path:hsa04962	Vasopressin-regulated water reabsorption	3	44	0.068	0.964138	0.999998	VAMP2 DCTN2 ADCY3
path:hsa04971	Gastric acid secretion	8	74	0.11	0.923691	0.999998	GNAQ ATP1B1 ADCY3 CA2 GNAI1 EZR KCNJ10 KCNJ2
path:hsa04976	Bile secretion	6	67	0.09	0.963729	0.999998	ATP1B1 ADCY3 ABCG2 CA2 AQP9 AQP1
path:hsa05012	Parkinsons disease	15	123	0.12	0.933981	0.999998	COX8C UQCRC1 CYCS SDHD UQCR10 NDUFA11 UQCRFS1 CYC1 NDUFB6 COX8A GNAI1 ATP5B PPIF NDUFAB1 LRRK2
path:hsa05016	Huntingtons disease	24	181	0.13	0.930903	0.999998	GNAQ COX8C UQCRC1 CYCS POLR2A GPX1 SIN3A DCTN2 SP1 SDHD UQCR10 NDUFA11 AP2S1 UQCRFS1 CYC1 NDUFB6 POLR2E TP53 COX8A ATP5B AP2A2 PPIF SOD2 NDUFAB1
path:hsa05030	Cocaine addiction	3	49	0.061	0.981823	0.999998	ATF6B GPSM1 GNAI1
path:hsa05031	Amphetamine addiction	4	68	0.059	0.995731	0.999998	ATF6B CAMK4 PPP1CC PPP3CC
path:hsa05032	Morphine addiction	11	88	0.12	0.872467	0.999998	GABRB2 PDE7A PDE3B GNG10 GNG5 ADCY3 ARRB1 GNAI1 GNG12 GNB2 GNG11
path:hsa05033	Nicotine addiction	1	38	0.026	0.994301	0.999998	GABRB2
path:hsa05160	Hepatitis C	14	125	0.11	0.967427	0.999998	AKT2 NR1H3 MAPK10 TNFRSF1A PIK3R3 NFKBIA CHUK TP53 CLDN20 IKBKE IRF1 STAT1 CD81 IFIT1
path:hsa05223	Non-small cell lung cancer	6	66	0.091	0.959504	0.999998	AKT2 RXRB PIK3R3 TP53 CCND1 CDK4

## Sheet: Supplementary Table 3
Supplementary Table 3. All KEGG pathway enrichment results in diffuse large B-cell lymphoma.
PathwayID	PathwayName	Count	Size	Percent	Pvalue	FDR	GeneSymbol
path:hsa04610	Complement and coagulation cascades	37	77	0.48	1.10378e-09	3.44379e-07	F8 C1R VWF SERPING1 F2R C3 C1QA C1S CFH C1QC C1QB CLU PLAU CFI VSIG4 SERPINA1 PLAUR A2M F13A1 TFPI C7 PLAT CFD PROS1 CD59 C5AR1 C3AR1 F5 PROCR CD46 C2 SERPINB2 SERPINE1 ITGAM F3 CR2 THBD
path:hsa05144	Malaria	21	44	0.48	2.67736e-06	0.000417668	VCAM1 IL18 CCL2 IL10 MYD88 HBB SDC2 SELE TLR4 SELP CD81 CD36 THBS2 TLR2 IL1B KLRK1 KLRB1 IFNG IL6 COMP THBS1
path:hsa04115	p53 signaling pathway	27	66	0.41	7.47244e-06	0.000777134	IGFBP3 CDK1 CD82 GORAB EI24 ATM IGF1 SESN1 CCNB1 MDM2 MDM4 BID TP53I3 CYCS TP53 CDK4 CCND1 STEAP3 CHEK1 RRM2 PPM1D SERPINE1 FAS SESN3 CCND2 CCNG1 THBS1
path:hsa04060	Cytokine-cytokine receptor interaction	74	252	0.29	1.33731e-05	0.0010431	CCL4 CCL19 TNFSF13B IL18 CSF1R CXCL12 CCL18 CCR5 CXCL10 IL7R CXCL11 CCL5 PDGFC CXCL13 CXCL9 CSF3R CCL2 IL10 ACVR1 IL1R1 TNFRSF1B IFNGR2 IL15 TNFRSF1A CXCL14 CXCR6 CCR1 CCR2 IL1R2 TNFRSF21 VEGFC IL2RB CX3CR1 CCR7 IL13RA1 CCL27 CXCL1 XCL1 CCL8 CCL21 PDGFRB KIT CD70 IL10RA OSMR CSF2RA TNFRSF9 LIFR TNFSF4 LTA FASLG TNFRSF4 CX3CL1 IL10RB IL22RA2 TNFRSF11B PDGFRA TNFRSF13C CXCL2 IL18RAP KDR IL1B IL17C …
path:hsa05323	Rheumatoid arthritis	30	81	0.37	3.00226e-05	0.00187341	TNFSF13B IL18 CXCL12 CCL5 CTSK ATP6V0B CCL2 ATP6AP1 IL15 ATP6V1B2 ATP6V1F TLR4 CXCL1 MMP1 ATP6V0E1 TEK CD86 ACP5 TLR2 HLA-DOB ATP6V1G1 CTLA4 IL1B CD28 CD80 CCL20 MMP3 IFNG IL6 FOS
path:hsa04062	Chemokine signaling pathway	52	172	0.3	8.67822e-05	0.0027076	CCL4 CCL19 HCK GNB2 CXCL12 CCL18 CCR5 CXCL10 CXCL11 CCL5 ITK NFKBIA CXCL13 PIK3R3 CXCL9 CHUK CCL2 CXCL14 CXCR6 CCR1 CCR2 FGR CX3CR1 PREX1 TIAM1 CCR7 CCL27 CXCL1 XCL1 CCL8 GNG10 PTK2B CCL21 GNAI1 GNG12 PAK1 SOS2 GNG11 AKT2 GRK1 CX3CL1 JAK2 CXCL2 STAT1 ARRB1 GNG5 CCL20 ADCY3 CCR10 CCL22 CCL17 CCL24
path:hsa05134	Legionellosis	21	52	0.4	7.31204e-05	0.0027076	CD14 IL18 C3 NFKBIA RAB1B MYD88 VCP TLR4 CASP1 CXCL1 TLR5 CYCS TLR2 PYCARD BNIP3 CXCL2 IL1B ITGAM SAR1A HSPA1A IL6
path:hsa05143	African trypanosomiasis	15	32	0.47	6.21649e-05	0.0027076	VCAM1 IL18 IDO1 GNAQ IL10 MYD88 THOP1 HBB SELE FASLG IDO2 IL1B FAS IFNG IL6
path:hsa05150	Staphylococcus aureus infection	20	49	0.41	8.46309e-05	0.0027076	C1R C3 C1QA C1S CFH C1QC C1QB CFI FCGR3B IL10 FPR3 FPR1 CFD C5AR1 C3AR1 SELP SELPLG HLA-DOB C2 ITGAM
path:hsa05418	Fluid shear stress and atherosclerosis	43	133	0.32	5.37151e-05	0.0027076	VCAM1 MMP9 SDC4 CAV1 SUMO4 NQO1 PIK3R3 CHUK MGST1 CCL2 ITGAV ACVR1 IL1R1 TNFRSF1A CAV2 MGST3 IL1R2 PLAT SDC2 SELE MAP3K5 HMOX1 ASS1 TRPV4 CTNNB1 KEAP1 TP53 AKT2 CALML4 GSTO1 GSTM3 KDR IL1B MAPK10 CDH5 GSTM2 THBD IFNG GSTM1 NCF2 TXN MEF2C FOS
path:hsa05142	Chagas disease (American trypanosomiasis)	33	98	0.34	0.000129199	0.00346128	CD3D C3 C1QA CCL5 NFKBIA GNAQ C1QC CD3G C1QB PIK3R3 CHUK CCL2 CD247 IL10 MYD88 IFNGR2 TNFRSF1A TLR4 CD3E GNAI1 GNA15 PPP2R2D FASLG AKT2 TLR2 TLR6 IL1B SERPINE1 MAPK10 FAS IFNG IL6 FOS
path:hsa05322	Systemic lupus erythematosus	34	102	0.33	0.000133126	0.00346128	SNRPB ACTN1 C1R C3 HIST1H4C C1QA C1S C1QC C1QB FCGR3B IL10 C7 HIST1H2AC HIST1H4H CD86 HLA-DOB HIST2H2AA3 HIST1H4B HIST1H4E C2 HIST3H2A HIST1H2BI HIST1H2AJ HIST1H2AI CD28 HIST1H3I HIST1H2AE CD80 HIST1H2BK HIST1H2BF HIST1H2BH IFNG HIST1H2BE HIST1H4L
path:hsa04668	TNF signaling pathway	35	107	0.33	0.000168915	0.00405396	VCAM1 MMP9 CXCL10 CCL5 NFKBIA PIK3R3 CHUK CEBPB CCL2 TNFRSF1B IL15 TNFRSF1A TNFAIP3 ATF6B MMP14 VEGFC SELE MAP3K5 CXCL1 JAG1 LTA MLKL AKT2 CX3CL1 NOD2 CXCL2 IL1B MAPK10 FAS IL18R1 CCL20 MMP3 CREB3L3 IL6 FOS
path:hsa05133	Pertussis	25	71	0.35	0.000293869	0.00654908	CD14 C1R SERPING1 C3 C1QA C1S C1QC C1QB IL10 MYD88 TLR4 CASP1 ITGB1 GNAI1 CALML4 PYCARD C2 IL1B LY96 MAPK10 SFTPA2 ITGAM IRF1 IL6 FOS
path:hsa05340	Primary immunodeficiency	15	36	0.42	0.000353537	0.00735357	CD3D IL7R CD8A ORAI1 RFXANK CD3E CD8B ZAP70 ICOS LCK CD79A ADA CIITA TNFRSF13C AICDA
path:hsa00480	Glutathione metabolism	19	50	0.38	0.000379747	0.00740507	GPX1 MGST1 PGD GCLM GPX8 MGST3 GPX4 LAP3 GSTK1 G6PD GCLC GPX3 GSTO1 GSTM3 RRM2 GPX2 HPGDS GSTM2 GSTM1
path:hsa00520	Amino sugar and nucleotide sugar metabolism	18	48	0.38	0.000616218	0.0113094	GNPDA1 NPL HK1 NANP CYB5R2 TSTA3 CHIT1 GPI HK3 HEXB UAP1 UXS1 PGM1 FUK RENBP FPGT GFPT2 GMDS
path:hsa04216	Ferroptosis	15	39	0.38	0.00103433	0.0169848	ACSL3 SLC40A1 GCLM MAP1LC3A SLC3A2 GPX4 ACSL1 HMOX1 FTL NCOA4 CYBB GCLC TP53 STEAP3 SLC7A11
path:hsa05202	Transcriptional misregulation in cancer	48	171	0.28	0.00099668	0.0169848	CD14 MMP9 CSF1R CEBPA ID2 DUSP6 MITF IGFBP3 PLAU CEBPB MLLT3 GZMB SMAD1 TSPAN7 NUPR1 TAF15 MAX IL1R2 CDK9 RXRB PLAT IL2RB ATM BCL11B CDKN1B SP1 IGF1 PBX1 MDM2 SIN3A TP53 CD86 MAF TCF3 CDKN2C JMJD1C SS18 BCL2A1 HIST1H3I ARNT2 HPGD ITGAM CCND2 FOXO1 REL MMP3 IL6 MEF2C
path:hsa04064	NF-kappa B signaling pathway	27	86	0.31	0.00151221	0.0218319	CD14 CCL4 VCAM1 CCL19 TNFSF13B CXCL12 NFKBIA PRKCQ PLAU CHUK RELB MYD88 IL1R1 TNFRSF1A TNFAIP3 TLR4 ATM CCL21 ZAP70 LTA LCK CSNK2A1 TNFRSF13C CXCL2 IL1B LY96 BCL2A1
path:hsa04110	Cell cycle	36	123	0.29	0.00153943	0.0218319	DBF4 TTK ORC4 MCM7 RBX1 ABL1 CDK1 CDC45 ESPL1 PCNA ATM CDKN1B MAD2L1 CCNB1 CDC20 MDM2 STAG2 YWHAQ CDC23 TP53 SMC1A CDK4 CCND1 BUB1B CHEK1 CDKN2C YWHAG PTTG2 CDC7 MCM2 YWHAE MCM5 CCND2 E2F5 CDC6 SMC1B
path:hsa05146	Amoebiasis	29	94	0.31	0.00149643	0.0218319	CD14 ACTN1 COL4A1 COL4A2 COL1A2 COL3A1 GNAQ HSPB1 PIK3R3 FN1 IL10 IL1R1 LAMB1 RAB7A IL1R2 TLR4 CXCL1 COL1A1 GNA15 ARG2 SERPINB6 TLR2 LAMC1 IL1B SERPINB3 LAMB2 ITGAM IFNG IL6
path:hsa00270	Cysteine and methionine metabolism	16	44	0.36	0.00161136	0.0218584	MDH2 DNMT1 GCLM AHCY MDH1 IL4I1 GOT2 MAT2B GCLC CDO1 ADI1 BCAT1 MTR ENOPH1 LDHA LDHB
path:hsa05132	Salmonella infection	25	79	0.32	0.00184298	0.0239587	CD14 CCL4 IL18 ARPC1B PLEKHM2 FLNA MYD88 RHOG IFNGR2 RAB7A TLR4 CASP1 CXCL1 TLR5 MYH10 TJP1 PKN2 PYCARD CXCL2 IL1B PFN2 MAPK10 IFNG IL6 FOS
path:hsa00010	Glycolysis / Gluconeogenesis	21	65	0.32	0.0026996	0.033691	HK1 ENO1 MINPP1 PGAM1 ADH5 ACSS2 GAPDH ALDH1A3 ALDOA FBP1 GPI TPI1 DLD HK3 PGM1 PGAM2 ALDH9A1 GALM LDHA LDHB ENO2
path:hsa01524	Platinum drug resistance	22	70	0.31	0.00336332	0.039428	MLH1 PIK3R3 MGST1 REV3L MGST3 TOP2A ATM MAP3K5 BRCA1 MDM2 SLC31A1 POLH BID CYCS TP53 FASLG AKT2 GSTO1 GSTM3 FAS GSTM2 GSTM1
path:hsa03030	DNA replication	13	36	0.36	0.00379115	0.039428	MCM7 POLD1 POLA2 PCNA RPA3 RFC5 RPA2 POLE3 RPA4 DNA2 RPA1 MCM2 MCM5
path:hsa03420	Nucleotide excision repair	15	43	0.35	0.00342459	0.039428	DDB1 XPC RBX1 POLD1 ERCC4 PCNA RPA3 RFC5 RPA2 POLE3 RPA4 RPA1 CUL4B MNAT1 GTF2H2
path:hsa03430	Mismatch repair	9	22	0.41	0.00373245	0.039428	MLH1 POLD1 PCNA RPA3 RFC5 RPA2 EXO1 RPA4 RPA1
path:hsa04142	Lysosome	34	120	0.28	0.00357435	0.039428	ACP2 CTSC LAMP2 CTSK ATP6V0B CD68 LAMP3 CTSA CTSB ATP6AP1 NPC2 LAPTM4B NEU1 LGMN CTSD DNASE2 GGA2 PSAP PPT1 CTSO HEXB AP4E1 ASAH1 MCOLN1 LIPA ACP5 NAGA NAPSA AP1S2 GLB1 AP3M2 GNS CD63 SCARB2
path:hsa04145	Phagosome	38	139	0.27	0.00459462	0.0456883	CD14 C1R COLEC12 C3 LAMP2 ATP6V0B HGS TUBA1C ITGAV FCGR3B ATP6AP1 RAB7A SEC61B ATP6V1B2 ATP6V1F TUBB6 TLR4 ITGB1 CYBB ATP6V0E1 CLEC7A CD36 HLA-G COLEC11 THBS2 TUBA1B TLR2 HLA-DOB ATP6V1G1 SEC61A2 TLR6 MARCO SFTPA2 ITGAM ITGB5 NCF2 COMP THBS1
path:hsa04978	Mineral absorption	16	48	0.33	0.00468598	0.0456883	CYBRD1 SLC40A1 ATP1B1 STEAP1 MT1E MT2A HMOX1 FTL MT1F MT1X STEAP2 SLC31A1 ATOX1 MT1M MT1G MT1H
path:hsa04640	Hematopoietic cell lineage	27	93	0.29	0.00533143	0.0504062	CD14 CD2 CSF1R CD3D IL7R CD8A CD3G CSF3R CD34 IL1R1 IL1R2 CD59 CD3E CD8B KIT CSF2RA CD1B CD36 CD33 CD22 HLA-DOB IL1B ITGAM CD44 CR2 IL7 IL6
path:hsa04512	ECM-receptor interaction	24	81	0.3	0.00578363	0.0530733	VWF COL6A3 TNC COL4A1 COL4A2 COL1A2 SDC4 ITGAV FN1 LAMB1 COL6A2 ITGB1 COL1A1 HMMR CD36 THBS2 LAMC1 LAMB2 ITGB5 CD44 SPP1 COL9A3 COMP THBS1
path:hsa04660	T cell receptor signaling pathway	28	100	0.28	0.00820227	0.0731174	CD3D ITK NFKBIA CD8A CD3G PRKCQ PIK3R3 CHUK CD247 IL10 LCP2 FYN CD3E CD8B ZAP70 PAK1 SOS2 ICOS LCK AKT2 NFKBIE PAK3 CDK4 PPP3CC CTLA4 CD28 IFNG FOS
path:hsa04658	Th1 and Th2 cell differentiation	25	88	0.28	0.00921569	0.0798693	CD3D NFKBIA CD3G PRKCQ CHUK STAT4 CD247 IFNGR2 MAML2 IL2RB CD3E ZAP70 MAML1 JAG1 LCK MAF NFKBIE JAK2 HLA-DOB PPP3CC STAT1 MAPK10 GATA3 IFNG FOS
path:hsa05152	Tuberculosis	44	172	0.26	0.00985862	0.0831321	CD14 FCER1G IL18 C3 LAMP2 ATP6V0B SPHK1 CEBPB CYP27B1 FCGR3B IL10 ATP6AP1 MYD88 IFNGR2 TNFRSF1A RAB7A CLEC4E RIPK2 TLR4 CTSD RFXANK CD74 IL10RA NFYA CLEC7A BID CYCS AKT2 CALML4 IL10RB TLR2 JAK2 HLA-DOB NOD2 CIITA PPP3CC TLR6 STAT1 IL1B MAPK10 LSP1 ITGAM IFNG IL6
path:hsa05332	Graft-versus-host disease	12	36	0.33	0.0105984	0.0870184	GZMB PRF1 HLA-G CD86 FASLG HLA-DOB IL1B FAS CD28 CD80 IFNG IL6
path:hsa04940	Type I diabetes mellitus	13	40	0.32	0.0110349	0.0882792	GZMB CPE PRF1 LTA HLA-G CD86 FASLG HLA-DOB IL1B FAS CD28 CD80 IFNG
path:hsa00982	Drug metabolism - cytochrome P450	16	53	0.3	0.0139717	0.106321	MGST1 FMO2 ADH5 MGST3 GSTK1 ALDH1A3 FMO4 FMO1 GSTO1 GSTM3 HPGDS AOX1 UGT2B17 GSTM2 FMO3 GSTM1
path:hsa04066	HIF-1 signaling pathway	26	95	0.27	0.0138059	0.106321	TIMP1 HK1 RBX1 PIK3R3 ENO1 IFNGR2 TLR4 HMOX1 CDKN1B GAPDH MKNK1 IGF1 CYBB ALDOA HIF1A HK3 TEK EIF4EBP1 EGLN3 AKT2 MKNK2 SERPINE1 LDHA ENO2 IFNG IL6
path:hsa00062	Fatty acid elongation	7	19	0.37	0.0158717	0.115162	ELOVL7 ELOVL1 ACOT4 MECR HADHB PPT1 HADH
path:hsa04620	Toll-like receptor signaling pathway	26	96	0.27	0.015867	0.115162	CD14 CCL4 CXCL10 CXCL11 CCL5 NFKBIA TLR8 CTSK PIK3R3 CXCL9 CHUK MYD88 TLR4 TLR5 CD86 AKT2 TLR2 TLR6 STAT1 IL1B LY96 MAPK10 CD80 SPP1 IL6 FOS
path:hsa03440	Homologous recombination	11	34	0.32	0.0167791	0.116335	PALB2 POLD1 ATM RPA3 BRCA1 RAD52 RPA2 RPA4 RPA1 BRIP1 RBBP8
path:hsa05330	Allograft rejection	11	34	0.32	0.0167791	0.116335	GZMB IL10 PRF1 HLA-G CD86 FASLG HLA-DOB FAS CD28 CD80 IFNG
path:hsa04933	AGE-RAGE signaling pathway in diabetic complications	26	97	0.27	0.0181658	0.123212	VCAM1 COL4A1 COL4A2 COL1A2 COL3A1 PIK3R3 CCL2 FN1 PLCD1 VEGFC SELE CDKN1B COL1A1 CYBB AKT2 CDK4 JAK2 CCND1 STAT1 IL1B SERPINE1 MAPK10 F3 FOXO1 THBD IL6
path:hsa03050	Proteasome	13	43	0.3	0.0214401	0.128641	PSMB1 PSMB10 PSMD3 PSMB3 PSMA3 PSMC2 ADRM1 PSMB8 PSMC3 PSMB5 PSMA2 PSMA4 IFNG
path:hsa04510	Focal adhesion	47	193	0.24	0.0201747	0.128641	ACTN1 VWF COL6A3 TNC COL4A1 COL4A2 COL1A2 CAV1 PDGFC PIK3R3 VASP FLNA ITGAV FN1 LAMB1 CAPN2 CAV2 VEGFC COL6A2 FYN PARVA IGF1 ITGB1 COL1A1 PDGFRB PAK1 SOS2 MYL12A CTNNB1 TLN1 AKT2 THBS2 PAK3 LAMC1 CCND1 PDGFRA KDR PPP1CC MAPK10 LAMB2 ITGB5 CCND2 SPP1 MYL2 COL9A3 COMP THBS1
path:hsa05020	Prion diseases	11	35	0.31	0.0212864	0.128641	C1QA CCL5 C1QC C1QB C7 FYN LAMC1 STIP1 IL1B HSPA1A IL6
path:hsa05145	Toxoplasmosis	28	107	0.26	0.0211475	0.128641	CCR5 NFKBIA CHUK IL10 MYD88 IFNGR2 LAMB1 TNFRSF1A PPIF TLR4 ITGB1 GNAI1 IL10RA CYCS AKT2 IL10RB PIK3CG TLR2 LAMC1 JAK2 HLA-DOB CIITA STAT1 LY96 MAPK10 LAMB2 HSPA1A IFNG
path:hsa05162	Measles	33	129	0.26	0.0202873	0.128641	CD3D NFKBIA CD3G PRKCQ PIK3R3 CHUK MYD88 IFNGR2 TNFAIP3 IL2RB TLR4 FYN CDKN1B CD3E SH2D1A TP53 FASLG AKT2 CD46 CDK4 TLR2 JAK2 CSNK2A1 CCND1 RAB9B STAT1 IL1B FAS CD28 CCND2 HSPA1A IFNG IL6
path:hsa05416	Viral myocarditis	16	55	0.29	0.0203262	0.128641	CAV1 ABL1 PRF1 FYN BID EIF4G3 CYCS HLA-G CD86 HLA-DOB CCND1 CD28 CD80 SGCA MYH6 MYH7
path:hsa04657	IL-17 signaling pathway	24	90	0.27	0.0229681	0.135208	MMP9 CXCL10 NFKBIA MAPK6 CHUK CEBPB CCL2 TNFAIP3 S100A9 CXCL1 MMP1 S100A8 S100A7 CXCL2 IL1B MAPK10 IL17C CCL20 IL17B MMP3 IFNG CCL17 IL6 FOS
path:hsa00590	Arachidonic acid metabolism	16	56	0.29	0.0242322	0.140008	GPX1 PLA2G2D PTGDS GPX8 PLA2G4A GPX3 PLA2G16 CBR1 LTA4H AKR1C3 PTGES3 GPX2 CBR3 HPGDS PLA2G4C PLA2G2A
path:hsa00980	Metabolism of xenobiotics by cytochrome P450	16	57	0.28	0.0286785	0.162685	HSD11B1 CYP1B1 MGST1 ADH5 MGST3 GSTK1 ALDH1A3 CBR1 GSTO1 GSTM3 EPHX1 CBR3 HPGDS UGT2B17 GSTM2 GSTM1
path:hsa00983	Drug metabolism - other enzymes	10	33	0.3	0.0330807	0.163828	IMPDH1 ITPA NAT1 IMPDH2 UCK2 TK1 DPYD TYMP UGT2B17 CES1
path:hsa03320	PPAR signaling pathway	19	70	0.27	0.0294186	0.163828	NR1H3 ACSL3 CYP27A1 PLIN2 RXRB ACSL1 ME1 MMP1 PLTP FABP4 CD36 SLC27A2 LPL SCP2 ACADM SLC27A1 FABP5 EHHADH ADIPOQ
path:hsa03410	Base excision repair	10	33	0.3	0.0330807	0.163828	PARP4 TDG POLD1 POLB MUTYH PCNA MPG POLE3 XRCC1 NEIL3
path:hsa03460	Fanconi anemia pathway	13	45	0.29	0.0316326	0.163828	MLH1 PALB2 REV3L ERCC4 RPA3 BRCA1 RPA2 USP1 RMI1 POLH RPA4 RPA1 BRIP1
path:hsa04392	Hippo signaling pathway - multiple species	8	25	0.32	0.0319175	0.163828	FRMD6 RASSF4 YAP1 LATS1 PAK1 WWTR1 LATS2 TEAD1
path:hsa04672	Intestinal immune network for IgA production	13	45	0.29	0.0316326	0.163828	TNFSF13B CXCL12 IL10 IL15 ICOS CD86 HLA-DOB TNFRSF13C CD28 CD80 CCR10 IL6 AICDA
path:hsa05166	HTLV-I infection	58	250	0.23	0.0308822	0.163828	VCAM1 CD3D FZD7 NFKBIA CD3G PIK3R3 POLD1 TSPO CHUK RELB KAT2A MYBL2 IL1R1 IL15 POLB TNFRSF1A IL1R2 IL2RB PCNA ATM RRAS FZD6 WNT2 RAN CD3E MAD2L1 CDC20 PDGFRB MAP3K1 ETS1 CTNNB1 POLE3 TLN1 LTA CDC23 LCK TP53 HLA-G AKT2 TCF3 CDK4 HLA-DOB TP53INP1 CCND1 BUB1B CHEK1 CDKN2C PDGFRA PTTG2 PPP3CC TNFRSF13C WNT5A FZD2 MRAS CCND2 ADCY3 IL6 FOS
path:hsa05321	Inflammatory bowel disease (IBD)	17	62	0.27	0.032261	0.163828	IL18 STAT4 IL10 IFNGR2 TLR4 TLR5 MAF TLR2 HLA-DOB NOD2 IL18RAP STAT1 IL1B IL18R1 GATA3 IFNG IL6
path:hsa03013	RNA transport	35	143	0.24	0.0337345	0.164456	RPP40 CYFIP1 SUMO4 EIF4A1 NUP35 EIF3D CLNS1A FMR1 NUP37 EIF2B2 POM121 RAN EIF4A3 XPOT TPR POP7 NUP205 GEMIN4 EIF3F EIF1AX POP1 EIF4G3 EIF4EBP1 POP4 ACIN1 DDX20 EIF5B SNUPN NUP88 EIF1AY TGS1 GEMIN5 NXT1 AAAS RGPD1
path:hsa00785	Lipoic acid metabolism	1	2	0.5	0.0350815	0.168391	LIAS
path:hsa01230	Biosynthesis of amino acids	18	67	0.27	0.0357093	0.168808	ACO1 GLUL ENO1 PGAM1 GAPDH TALDO1 GOT2 MAT2B ASS1 ALDOA TPI1 ARG2 PGAM2 BCAT1 MTR ALDH18A1 ENO2 GPT
path:hsa00514	Other types of O-glycan biosynthesis	6	18	0.33	0.0372185	0.171788	GXYLT1 POGLUT1 B4GALT1 ST6GAL1 GXYLT2 OGT
path:hsa04514	Cell adhesion molecules (CAMs)	33	135	0.24	0.0379916	0.171788	VCAM1 CD2 SDC4 CD8A ITGAV CD34 VCAN TIGIT SDC2 SELE ITGB1 PTPRM CD8B SELP SPN ICOS CLDN20 SIGLEC1 CNTNAP1 HLA-G CD86 SELPLG CD22 HLA-DOB CADM1 CD274 CTLA4 CDH3 CD28 CDH5 CD80 ITGAM CNTNAP2
path:hsa04659	Th17 cell differentiation	26	103	0.25	0.0379368	0.171788	CD3D NFKBIA CD3G PRKCQ CHUK CD247 IL1R1 IFNGR2 RXRB IL2RB CD3E ZAP70 AHR HIF1A LCK NFKBIE JAK2 HLA-DOB PPP3CC STAT1 IL1B MAPK10 GATA3 IFNG IL6 FOS
path:hsa00130	Ubiquinone and other terpenoid-quinone biosynthesis	4	11	0.36	0.0390319	0.173971	COQ5 NQO1 VKORC1 COQ3
path:hsa00051	Fructose and mannose metabolism	9	30	0.3	0.041213	0.17859	HK1 TSTA3 ALDOA FBP1 TPI1 HK3 FUK FPGT GMDS
path:hsa05140	Leishmaniasis	18	68	0.26	0.0411362	0.17859	C3 NFKBIA FCGR3B IL10 MYD88 IFNGR2 TLR4 ITGB1 CYBB TLR2 JAK2 HLA-DOB STAT1 IL1B ITGAM IFNG NCF2 FOS
path:hsa05130	Pathogenic Escherichia coli infection	14	51	0.27	0.043095	0.184187	CD14 ARPC1B ABL1 TUBA1C TUBB6 TLR4 FYN ITGB1 TLR5 CTNNB1 YWHAQ EZR TUBA1B LY96
path:hsa00740	Riboflavin metabolism	3	8	0.38	0.0453413	0.189873	ACP2 BLVRB ACP5
path:hsa05204	Chemical carcinogenesis	16	60	0.27	0.0456426	0.189873	HSD11B1 CYP1B1 MGST1 ADH5 NAT1 MGST3 GSTK1 ALDH1A3 CBR1 GSTO1 GSTM3 EPHX1 HPGDS UGT2B17 GSTM2 GSTM1
path:hsa00400	Phenylalanine, tyrosine and tryptophan biosynthesis	2	5	0.4	0.0486208	0.192021	IL4I1 GOT2
path:hsa00524	Neomycin, kanamycin and gentamicin biosynthesis	2	5	0.4	0.0486208	0.192021	HK1 HK3
path:hsa00750	Vitamin B6 metabolism	2	5	0.4	0.0486208	0.192021	PNPO AOX1
path:hsa04151	PI3K-Akt signaling pathway	76	344	0.22	0.0483114	0.192021	VWF COL6A3 TNC CSF1R GNB2 COL4A1 COL4A2 F2R COL1A2 IL7R PDGFC SGK3 LPAR1 PIK3R3 CSF3R CHUK MTCP1 ITGAV LPAR6 FN1 LAMB1 EFNA1 ATF6B VEGFC IL2RB TLR4 COL6A2 CDKN1B FGF13 BRCA1 IGF1 ITGB1 GNG10 COL1A1 PDGFRB KIT GNG12 MDM2 SOS2 OSMR GNG11 MCL1 TEK YWHAQ PPP2R2D EIF4EBP1 TP53 PKN2 FASLG AKT2 THBS2 PIK3CG PHLPP2 CDK4 TLR2 LAMC1 JAK2 CCND1 PDGFRA YWHAG FGF8 YWHAE KDR LAMB2 GNG5 ITGB5 CCND2 SPP1 SGK1 CR…
path:hsa04380	Osteoclast differentiation	30	125	0.24	0.0551148	0.214948	CSF1R FHL2 NFKBIA CTSK TYROBP MITF PIK3R3 CHUK RELB FCGR3B LCP2 IL1R1 IFNGR2 TNFRSF1A FYN TREM2 LILRB3 LCK CAMK4 AKT2 ACP5 TNFRSF11B PPP3CC STAT1 IL1B MAPK10 IFNG NCF2 LILRB2 FOS
path:hsa05168	Herpes simplex infection	40	173	0.23	0.0594758	0.228176	C3 CCL5 NFKBIA TAF6 CHUK CDK1 CCL2 MYD88 IFNGR2 SRSF5 IL15 TNFRSF1A SRSF4 TAF3 POLR2A CD74 CDC34 LTA CYCS TP53 HLA-G CFP FASLG GTF2I EEF1D TLR2 JAK2 CSNK2A1 HLA-DOB TAF13 STAT1 PPP1CC IL1B MAPK10 TAF4 FAS IFIT1 IFNG IL6 FOS
path:hsa05205	Proteoglycans in cancer	45	197	0.23	0.0599694	0.228176	MMP9 LUM SDC4 CAV1 FZD7 DCN PIK3R3 PLAU HPSE FLNA ITGAV TIMP3 MIR21 FN1 PLAUR CAV2 SDC2 TLR4 RRAS TIAM1 FZD6 WNT2 IGF1 ITGB1 MDM2 HIF1A PAK1 SOS2 CTNNB1 EZR TP53 FASLG AKT2 TLR2 CCND1 KDR PPP1CC WNT5A FAS CD63 FZD2 ITGB5 MRAS CD44 THBS1
path:hsa00380	Tryptophan metabolism	10	37	0.27	0.0715786	0.256696	IDO1 CYP1B1 GCDH IL4I1 TDO2 IDO2 ALDH9A1 HADH AOX1 EHHADH
path:hsa00565	Ether lipid metabolism	10	37	0.27	0.0715786	0.256696	ENPP2 PLA2G2D PLA2G7 PLD3 AGPS PLA2G4A PLA2G16 PLD1 PLA2G4C PLA2G2A
path:hsa00920	Sulfur metabolism	3	9	0.33	0.0697721	0.256696	PAPSS2 ETHE1 CYCS
path:hsa01200	Carbon metabolism	26	109	0.24	0.0705665	0.256696	ACO1 MDH2 HK1 PGD ENO1 MDH1 PGAM1 ADH5 ACSS2 G6PD ME1 GAPDH TALDO1 GOT2 ALDOA FBP1 GPI TPI1 DLD HK3 PGAM2 SDHD ACADM ENO2 GPT EHHADH
path:hsa05200	Pathways in cancer	110	520	0.21	0.0690522	0.256696	MMP9 CSF1R GNB2 CEBPA CXCL12 COL4A1 COL4A2 F2R IL7R FZD7 NFKBIA MLH1 GNAQ RBX1 NQO1 LPAR1 ABL1 MITF PIK3R3 CSF3R CHUK STAT4 MGST1 ITGAV LPAR6 LRP6 FN1 IFNGR2 IL15 LAMB1 CTBP2 PTGER4 MAX MGST3 VEGFC RXRB IL2RB EDNRA HMOX1 CDKN1B FGF13 FZD6 IL13RA1 SP1 WNT2 NCOA4 TCF7L2 IGF1 ITGB1 GNG10 PDGFRB GNAI1 KIT GNG12 MDM2 DAPK1 TPR MMP1 RALGDS HIF1A SOS2 GNG11 BID ETS1 CSF2RA CTNNB1 KEAP1 JAG1 AXIN1 NCOA3 …
path:hsa00061	Fatty acid biosynthesis	4	13	0.31	0.0785476	0.274657	ACSL3 ACSL1 MCAT ACACA
path:hsa00790	Folate biosynthesis	7	25	0.28	0.0801082	0.274657	GGH SPR CBR1 ALPI AKR1C3 GCH1 TH
path:hsa00860	Porphyrin and chlorophyll metabolism	8	29	0.28	0.0776762	0.274657	BLVRB HMBS ALAS1 FECH HMOX1 CPOX HCCS UGT2B17
path:hsa03022	Basal transcription factors	11	42	0.26	0.0799836	0.274657	TAF6 TAF7 GTF2A2 TAF15 TAF3 GTF2A1 GTF2I TAF13 MNAT1 TAF4 GTF2H2
path:hsa00620	Pyruvate metabolism	10	38	0.26	0.0843931	0.286203	MDH2 MDH1 GLO1 ACSS2 ME1 DLD ACACA ALDH9A1 LDHA LDHB
path:hsa00600	Sphingolipid metabolism	9	34	0.26	0.088868	0.298138	SPHK1 SGMS1 NEU1 CERK ACER3 ASAH1 NEU3 GLB1 DEGS2
path:hsa00500	Starch and sucrose metabolism	8	30	0.27	0.0933033	0.306428	HK1 AGL GYG1 PYGL GPI HK3 PGM1 GBE1
path:hsa04120	Ubiquitin mediated proteolysis	30	131	0.23	0.0926476	0.306428	UBE2S DDB1 UBE2M RBX1 UBE2D4 NEDD4 UBE2E1 FBXW11 MGRN1 UBE2D1 RHOBTB1 BRCA1 UBE2E3 UBE4B UBA2 CDC20 MDM2 PRPF19 UBE2G2 UBE2C MAP3K1 CDC34 UBE2NL KEAP1 CDC23 TRIM32 CUL4B WWP1 STUB1 UBE2Q2
path:hsa04390	Hippo signaling pathway	33	146	0.23	0.0972754	0.316145	ID2 FRMD6 FZD7 ID1 YAP1 TP53BP2 SMAD1 SNAI2 SMAD7 FBXW11 FZD6 WNT2 TCF7L2 CTGF LATS1 CTNNB1 AXIN1 YWHAQ PPP2R2D WWTR1 BMP8B CCND1 YWHAG LATS2 CTNNA2 TEAD1 YWHAE PPP1CC WNT5A SERPINE1 NKD1 FZD2 CCND2
path:hsa00280	Valine, leucine and isoleucine degradation	12	48	0.25	0.100292	0.319297	BCKDHA HSD17B10 IL4I1 HADHB DLD ALDH9A1 BCAT1 HADH AUH ACADM AOX1 EHHADH
path:hsa04630	Jak-STAT signaling pathway	35	156	0.22	0.0998817	0.319297	IL7R PIK3R3 CSF3R STAT4 SOCS2 IL10 IFNGR2 IL15 SOCS5 IL2RB SOCS7 IL13RA1 FHL1 PDGFRB IL10RA SOS2 OSMR MCL1 CSF2RA LIFR STAM AKT2 IL10RB JAK2 IL22RA2 CCND1 PDGFRA CISH STAM2 STAT1 AOX1 CCND2 IL7 IFNG IL6
path:hsa00603	Glycosphingolipid biosynthesis - globo and isoglobo series	4	14	0.29	0.104037	0.327874	GBGT1 ST8SIA1 HEXB NAGA
path:hsa05230	Central carbon metabolism in cancer	15	62	0.24	0.105375	0.32877	HK1 PIK3R3 SCO2 PGAM1 SLC7A5 G6PD PDGFRB KIT HIF1A HK3 TP53 PGAM2 AKT2 PDGFRA LDHA
path:hsa04611	Platelet activation	27	119	0.23	0.111592	0.343761	VWF FCER1G F2R COL1A2 COL3A1 GNAQ GUCY1A3 PIK3R3 VASP GUCY1B3 LCP2 ORAI1 FYN ITGB1 COL1A1 GNAI1 MYL12A PLA2G4A TLN1 AKT2 PIK3CG PPP1CC SNAP23 PLA2G4C ADCY3 GNA13 P2RX1
path:hsa04931	Insulin resistance	24	105	0.23	0.114587	0.343761	NR1H3 NFKBIA PRKCQ PIK3R3 RPS6KA3 TNFRSF1A PYGL IRS2 NR1H2 RPS6KA1 MGEA5 CD36 MLXIP SLC27A2 AKT2 TBC1D4 PPP1CC MAPK10 OGT SLC27A1 GFPT2 FOXO1 CREB3L3 IL6
path:hsa04974	Protein digestion and absorption	20	86	0.23	0.113961	0.343761	COL6A3 COL15A1 COL4A1 COL4A2 COL1A2 COL3A1 COL5A2 ATP1B1 SLC3A2 COL6A2 COL1A1 SLC7A7 CPA3 DPP4 COL11A1 KCNE3 KCNJ13 COL5A3 COL5A1 COL9A3
path:hsa05219	Bladder cancer	10	40	0.25	0.113986	0.343761	MMP9 MDM2 DAPK1 MMP1 TP53 DAPK3 CDK4 TYMP CCND1 THBS1
path:hsa04920	Adipocytokine signaling pathway	16	68	0.24	0.122451	0.363854	NFKBIA ACSL3 PRKCQ CHUK TNFRSF1B TNFRSF1A IRS2 RXRB ACSL1 CD36 AKT2 NFKBIE ADIPOR2 JAK2 MAPK10 ADIPOQ
path:hsa00071	Fatty acid degradation	10	41	0.24	0.130737	0.37422	ACSL3 ADH5 GCDH ACSL1 HADHB ALDH9A1 HADH ACADM EHHADH CYP4A22
path:hsa00531	Glycosaminoglycan degradation	5	19	0.26	0.128711	0.37422	HPSE HYAL2 HEXB GLB1 GNS
path:hsa00640	Propanoate metabolism	8	32	0.25	0.129604	0.37422	BCKDHA ACSS2 DLD ACACA ACADM LDHA LDHB EHHADH
path:hsa05215	Prostate cancer	22	97	0.23	0.130398	0.37422	MMP9 PDGFC NFKBIA PIK3R3 PLAU CHUK IL1R2 PLAT CDKN1B TCF7L2 IGF1 PDGFRB MDM2 SOS2 CTNNB1 TP53 AKT2 CCND1 PDGFRA FOXO1 MMP3 CREB3L3
path:hsa00030	Pentose phosphate pathway	7	28	0.25	0.138137	0.391807	PGD G6PD TALDO1 ALDOA FBP1 GPI PGM1
path:hsa00561	Glycerolipid metabolism	12	51	0.24	0.1452	0.407751	AGPAT1 LCLAT1 MGLL MBOAT2 DGAT2 AGPAT5 LIPG LPL LPIN1 MBOAT1 ALDH9A1 LIPF
path:hsa01100	Metabolic pathways	227	1143	0.2	0.146372	0.407751	UQCRC1 UQCR10 GNPDA1 PLA2G2D ACO1 ACP2 PLA2G7 PIGA IDO1 EXTL2 PTGDS MDH2 PNP NNMT HK1 ACSL3 COQ5 BCKDHA IMPDH1 ATP6V0B PIGU PAPSS2 AGPAT1 BLVRB POLD1 POLR2E HMBS HSD11B1 DCTD SPHK1 DNMT1 AK4 DHCR24 NANP CYP27A1 ALAS1 INPP5E ALDH1A1 LCLAT1 CYP27B1 SGMS1 MTHFD1 FKTN REV3L HPSE HYAL2 GLUL PGD ENO1 MAN1C1 GCLM MGLL ATP6AP1 ACOT4 ITPA MINPP1 AGL AHCY MDH1 PGAM1 HSD17B10 PLD3 MBOAT2 SPR DHRS3 ADH5 NAT1…
path:hsa04130	SNARE interactions in vesicular transport	8	33	0.24	0.150173	0.414637	STX10 BNIP1 VAMP2 STX16 VTI1B VAMP1 VAMP7 SNAP23
path:hsa00220	Arginine biosynthesis	5	20	0.25	0.156244	0.423897	GLUL GOT2 ASS1 ARG2 GPT
path:hsa04217	Necroptosis	32	148	0.22	0.155994	0.423897	PARP4 IL33 STAT4 GLUL IFNGR2 TNFRSF1A TNFAIP3 CAPN2 PYGL TLR4 FTL CASP1 HIST1H2AC CYBB PLA2G4A BID MLKL FASLG JAK2 HIST2H2AA3 PYCARD HIST3H2A STAT1 IL1B RNF31 HIST1H2AJ MAPK10 FAS HIST1H2AI PLA2G4C HIST1H2AE IFNG
path:hsa00290	Valine, leucine and isoleucine biosynthesis	1	4	0.25	0.161632	0.434734	BCAT1
path:hsa00310	Lysine degradation	10	43	0.23	0.167961	0.4441	PLOD1 PLOD2 GCDH PRDM2 SETD2 ALDH9A1 EHMT1 HADH EHHADH BBOX1
path:hsa01212	Fatty acid metabolism	10	43	0.23	0.167961	0.4441	ACSL3 MECR ACSL1 MCAT HADHB PPT1 ACACA HADH ACADM EHHADH
path:hsa00564	Glycerophospholipid metabolism	18	81	0.22	0.170145	0.446094	PLA2G2D AGPAT1 LCLAT1 LYPLA1 PLD3 MBOAT2 MBOAT7 AGPAT5 PNPLA7 PLA2G4A GPD1L PLA2G16 LPIN1 MBOAT1 LYPLA2 PLD1 PLA2G4C PLA2G2A
path:hsa03450	Non-homologous end-joining	3	12	0.25	0.172799	0.449277	NHEJ1 XRCC5 POLM
path:hsa05320	Autoimmune thyroid disease	11	48	0.23	0.17463	0.450286	GZMB IL10 PRF1 HLA-G CD86 FASLG HLA-DOB CTLA4 FAS CD28 CD80
path:hsa00592	alpha-Linolenic acid metabolism	5	21	0.24	0.186084	0.475887	PLA2G2D PLA2G4A PLA2G16 PLA2G4C PLA2G2A
path:hsa00250	Alanine, aspartate and glutamate metabolism	8	35	0.23	0.195702	0.483803	GLUL IL4I1 GOT2 ASS1 ADSL ADSS GFPT2 GPT
path:hsa00360	Phenylalanine metabolism	4	17	0.24	0.200034	0.483803	MIF IL4I1 ALDH1A3 GOT2
path:hsa00511	Other glycan degradation	4	17	0.24	0.200034	0.483803	NEU1 HEXB NEU3 GLB1
path:hsa01210	2-Oxocarboxylic acid metabolism	4	17	0.24	0.200034	0.483803	ACO1 GOT2 BCAT1 GPT
path:hsa04650	Natural killer cell mediated cytotoxicity	26	122	0.21	0.195927	0.483803	FCER1G TYROBP HCST PIK3R3 FCGR3B CD247 GZMB LCP2 IFNGR2 PRF1 FYN PTK2B ZAP70 PAK1 SH2D1A SOS2 BID LCK HLA-G FASLG KLRC3 PPP3CC FAS ULBP3 KLRK1 IFNG
path:hsa05110	Vibrio cholerae infection	11	49	0.22	0.194228	0.483803	ATP6V0B ATP6AP1 SEC61B ATP6V1B2 ATP6V1F ATP6V0E1 TJP2 TJP1 ATP6V1G1 SEC61A2 ADCY3
path:hsa05206	MicroRNAs in cancer	32	152	0.21	0.198364	0.483803	MMP9 TNC VIM ABL1 PLAU DNMT1 CYP1B1 KIF23 ZFPM2 TIMP3 MIR21 CDCA5 IRS2 ATM HMOX1 CDKN1B BRCA1 SPRY2 PDGFRB MDM2 MDM4 SOS2 MCL1 ZEB2 EZR TP53 CCND1 PDGFRA CD44 CCND2 CCNG1 THBS1
path:hsa04623	Cytosolic DNA-sensing pathway	13	59	0.22	0.203219	0.487726	CCL4 TMEM173 IL18 CXCL10 CCL5 NFKBIA IL33 POLR2E CHUK CASP1 PYCARD IL1B IL6
path:hsa04917	Prolactin signaling pathway	15	69	0.22	0.209521	0.495231	PIK3R3 SOCS2 SOCS5 SOCS7 SOS2 AKT2 JAK2 CCND1 CISH STAT1 MAPK10 CCND2 IRF1 TH FOS
path:hsa05203	Viral carcinogenesis	39	188	0.21	0.208371	0.495231	ACTN1 DDB1 CCR5 C3 HDAC3 HIST1H4C NFKBIA PIK3R3 CDK1 KAT2A GTF2A2 POLB ATF6B CDKN1B GTF2A1 CDC20 MDM2 YWHAQ HIST1H4H TP53 HLA-G CDK4 CCND1 CHEK1 YWHAG HIST1H4B HIST1H4E YWHAE DNAJA3 HIST1H2BI GTF2H2 HIST1H2BK HIST1H2BF CCND2 REL CREB3L3 HIST1H2BH HIST1H2BE HIST1H4L
path:hsa04010	MAPK signaling pathway	58	285	0.2	0.215041	0.504457	CD14 CSF1R DUSP2 PDGFC DUSP6 HSPB1 CHUK RELB MAP3K4 FLNA RPS6KA3 DUSP5 MYD88 IL1R1 DUSP3 EFNA1 TNFRSF1A MAX VEGFC MAP3K5 RRAS FGF13 MKNK1 IGF1 MAPKAPK3 PDGFRB KIT GNG12 PAK1 SOS2 RPS6KA1 MAPK8IP3 PLA2G4A MAP3K1 TEK TP53 FASLG AKT2 MKNK2 RASA1 CACNG8 PDGFRA FGF8 PPP3CC MAPK8IP1 KDR IL1B MAPK10 ARRB1 FAS PLA2G4C CACNG7 MRAS HSPA1A CACNG6 FGF3 MEF2C FOS
path:hsa03060	Protein export	5	22	0.23	0.217917	0.50562	SRP68 SEC61B IMMP2L SEC61A2 SRP9
path:hsa04068	FoxO signaling pathway	27	129	0.21	0.221953	0.50562	PLK2 IL7R SGK3 PIK3R3 CHUK IL10 FBXO25 IRS2 ATM CDKN1B IGF1 FBXO32 CCNB1 MDM2 SOS2 HOMER1 FASLG AKT2 CCND1 BNIP3 MAPK10 S1PR1 CCND2 FOXO1 SGK1 SOD2 IL6
path:hsa04210	Apoptosis	28	134	0.21	0.222019	0.50562	CTSC NFKBIA PARP4 CTSK PIK3R3 CHUK TUBA1C CTSB GZMB PRF1 TNFRSF1A CAPN2 CASP2 ATM MAP3K5 CTSD CTSO BID MCL1 CYCS TP53 FASLG AKT2 TUBA1B MAPK10 BCL2A1 FAS FOS
path:hsa04975	Fat digestion and absorption	8	36	0.22	0.22042	0.50562	PLA2G2D AGPAT1 ABCA1 DGAT2 GOT2 CD36 LIPF PLA2G2A
path:hsa04924	Renin secretion	14	65	0.22	0.225054	0.508818	GNAQ GUCY1A3 AQP1 CTSB GUCY1B3 ORAI1 PTGER4 EDNRA GNAI1 KCNJ2 CALML4 PPP3CC PTGER2 PDE3B
path:hsa04662	B cell receptor signaling pathway	15	70	0.21	0.227341	0.510291	NFKBIA PIK3R3 CHUK IFITM1 LILRB3 SOS2 CD81 INPPL1 AKT2 NFKBIE CD79A CD22 PPP3CC CR2 FOS
path:hsa04966	Collecting duct acid secretion	6	27	0.22	0.230406	0.513476	SLC12A7 CA2 ATP6V1B2 ATP6V1F ATP6V0E1 ATP6V1G1
path:hsa00232	Caffeine metabolism	1	5	0.2	0.236973	0.520877	NAT1
path:hsa00770	Pantothenate and CoA biosynthesis	4	18	0.22	0.237066	0.520877	VNN1 PANK2 DPYD BCAT1
path:hsa04137	Mitophagy - animal	13	61	0.21	0.242045	0.528098	MITF OPTN FUNDC1 RAB7A RRAS SP1 RHOT1 HIF1A TP53 CSNK2A1 BNIP3 MAPK10 MRAS
path:hsa05221	Acute myeloid leukemia	14	66	0.21	0.244126	0.52894	CD14 CSF1R CEBPA DUSP6 PIK3R3 CHUK TCF7L2 KIT SOS2 EIF4EBP1 AKT2 CCND1 BCL2A1 ITGAM
path:hsa04141	Protein processing in endoplasmic reticulum	32	156	0.21	0.245998	0.52932	RBX1 UBE2D4 MAN1C1 SEC61B CAPN2 VCP MARCH6 ATF6B DNAJA2 NPLOC4 MAP3K5 DNAJB1 UBE2D1 MOGS UBE4B P4HB FBXO6 HSPBP1 UBE2G2 GANAB RPN2 DNAJC5B CRYAB EDEM1 HYOU1 SEC61A2 STUB1 SEC31A SSR4 MAPK10 SAR1A HSPA1A
path:hsa04670	Leukocyte transendothelial migration	22	106	0.21	0.249961	0.530529	ACTN1 VCAM1 MMP9 CXCL12 ITK PIK3R3 VASP THY1 ITGB1 PTK2B CYBB SIPA1 GNAI1 MYL12A CTNNB1 CLDN20 EZR CTNNA2 CDH5 ITGAM MYL2 NCF2
path:hsa05231	Choline metabolism in cancer	19	91	0.21	0.24935	0.530529	PDGFC PIK3R3 LYPLA1 SP1 SLC44A2 PIP5K1A PDGFRB RALGDS HIF1A SOS2 PLA2G4A EIF4EBP1 AKT2 WASF3 PLD1 PDGFRA MAPK10 PLA2G4C FOS
path:hsa00510	N-Glycan biosynthesis	10	47	0.21	0.255328	0.538259	MAN1C1 MOGS MGAT4B DOLPP1 GANAB RPN2 B4GALT1 ST6GAL1 ALG6 MGAT5
path:hsa00230	Purine metabolism	32	157	0.2	0.258642	0.54144	PNP IMPDH1 PAPSS2 GUCY1A3 POLD1 POLR2E AK4 GUCY1B3 ITPA POLA2 NME1 NME3 IMPDH2 AK3 PDE6G POLR2A PDE7A POLR1B PNPT1 PGM1 POLE3 ATIC ENPP4 NUDT5 ADA ADSL ADSS ENTPD6 RRM2 PFAS PDE3B ADCY3
path:hsa04014	Ras signaling pathway	45	224	0.2	0.267249	0.54144	RGL1 CSF1R PLA2G2D GNB2 PDGFC ABL1 PIK3R3 CHUK EFNA1 VEGFC RRAS FGF13 TIAM1 PLA1A IGF1 GNG10 ZAP70 PDGFRB KIT GNG12 RALGDS PAK1 SOS2 GNG11 PLA2G4A RASA3 ETS1 TEK PLA2G16 FASLG AKT2 CALML4 PAK3 PLD1 RASA1 PDGFRA FGF8 KDR MAPK10 PLA2G4C GNG5 MRAS REL FGF3 PLA2G2A
path:hsa04114	Oocyte meiosis	23	112	0.21	0.265085	0.54144	RBX1 CDK1 RPS6KA3 SLK ESPL1 FBXW11 IGF1 MAD2L1 CCNB1 CDC20 RPS6KA1 SPDYE1 YWHAQ CDC23 SMC1A CALML4 YWHAG PTTG2 PPP3CC YWHAE PPP1CC ADCY3 SMC1B
path:hsa04211	Longevity regulating pathway	18	87	0.21	0.266108	0.54144	PIK3R3 ATF6B IRS2 IGF1 SESN1 EIF4EBP1 APPL1 TP53 CAMK4 AKT2 ADIPOR2 EHMT1 SESN3 ADCY3 FOXO1 CREB3L3 SOD2 ADIPOQ
path:hsa05120	Epithelial cell signaling in Helicobacter pylori infection	14	67	0.21	0.263802	0.54144	CCL5 NFKBIA ATP6V0B CHUK ATP6AP1 ATP6V1B2 ATP6V1F CXCL1 PAK1 ATP6V0E1 PTPRZ1 TJP1 ATP6V1G1 MAPK10
path:hsa05222	Small cell lung cancer	19	92	0.21	0.266159	0.54144	COL4A1 COL4A2 NFKBIA PIK3R3 CHUK ITGAV FN1 LAMB1 MAX RXRB CDKN1B ITGB1 CYCS TP53 AKT2 CDK4 LAMC1 CCND1 LAMB2
path:hsa04330	Notch signaling pathway	10	48	0.21	0.279319	0.562242	PSENEN KAT2A DTX4 CTBP2 MAML2 PSEN1 MAML1 CIR1 DTX3L JAG1
path:hsa03008	Ribosome biogenesis in eukaryotes	14	68	0.21	0.28402	0.564878	RPP40 NOB1 RIOK1 REXO1 RAN EMG1 POP7 UTP14C POP1 POP4 CSNK2A1 NOP58 NOP10 NXT1
path:hsa04260	Cardiac muscle contraction	15	73	0.21	0.284282	0.564878	UQCRC1 UQCR10 ATP1B1 TPM4 UQCRFS1 SLC9A6 CYC1 COX8A CACNG8 CACNG7 COX8C CACNG6 MYL2 MYH6 MYH7
path:hsa05034	Alcoholism	31	154	0.2	0.28606	0.564878	GNB2 HDAC3 HIST1H4C ATF6B GNG10 HIST1H2AC GNAI1 GNG12 SOS2 GNG11 HIST1H4H CAMK4 CALML4 HIST2H2AA3 HIST1H4B HIST1H4E HIST3H2A PPP1CC HIST1H2BI HIST1H2AJ HIST1H2AI HIST1H3I HIST1H2AE GNG5 HIST1H2BK HIST1H2BF CREB3L3 HIST1H2BH HIST1H2BE HIST1H4L TH
path:hsa04310	Wnt signaling pathway	28	139	0.2	0.290071	0.568207	SERPINF1 FZD7 RBX1 LRP6 CTBP2 SFRP4 FBXW11 PSEN1 FZD6 RUVBL1 WNT2 TCF7L2 CTNNBIP1 CTNNB1 AXIN1 TP53 CSNK2A1 DAAM1 CCND1 PPP3CC MMP7 SFRP2 WNT5A MAPK10 NKD1 FZD2 BAMBI CCND2
path:hsa04371	Apelin signaling pathway	27	134	0.2	0.291388	0.568207	GNB2 GNAQ SPHK1 APLNR PLAT RRAS GNG10 CTGF GNAI1 GNG12 GNG11 JAG1 CAMK4 AKT2 CALML4 PIK3CG TFAM CCND1 PDE3B SERPINE1 GNG5 MRAS ADCY3 SPP1 GNA13 MYL2 MEF2C
path:hsa00604	Glycosphingolipid biosynthesis - ganglio series	3	15	0.2	0.304734	0.579738	ST8SIA1 HEXB GLB1
path:hsa03018	RNA degradation	15	74	0.2	0.304238	0.579738	C1D DCP1B ENO1 EXOSC3 EXOSC5 CNOT4 CNOT3 PNPT1 CNOT6L PATL1 DDX6 WDR61 CNOT10 EDC4 ENO2
path:hsa04612	Antigen processing and presentation	14	69	0.2	0.304715	0.579738	CD8A CTSB LGMN RFXANK CD8B CD74 NFYA HLA-G TAPBP KLRC3 HLA-DOB CIITA HSPA1A IFNG
path:hsa05161	Hepatitis B	28	140	0.2	0.304526	0.579738	MMP9 DDB1 NFKBIA PIK3R3 CHUK STAT4 ATP6AP1 MYD88 ATF6B PCNA TLR4 CDKN1B PTK2B MAP3K1 YWHAQ CYCS TP53 FASLG AKT2 CDK4 TLR2 CCND1 STAT1 MAPK10 FAS CREB3L3 IL6 FOS
path:hsa00052	Galactose metabolism	6	30	0.2	0.325584	0.589929	HK1 HK3 B4GALT1 PGM1 GALM GLB1
path:hsa00350	Tyrosine metabolism	7	35	0.2	0.327717	0.589929	MIF ADH5 IL4I1 ALDH1A3 GOT2 AOX1 TH
path:hsa00563	Glycosylphosphatidylinositol (GPI) - anchor biosynthesis	5	25	0.2	0.321877	0.589929	PIGA PIGU PIGP PIGK PIGY
path:hsa00591	Linoleic acid metabolism	5	25	0.2	0.321877	0.589929	PLA2G2D PLA2G4A PLA2G16 PLA2G4C PLA2G2A
path:hsa03040	Spliceosome	24	121	0.2	0.327008	0.589929	SNRPB SF3B4 SRSF5 SF3B5 SRSF4 PHF5A HNRNPU DDX23 PRPF8 EIF4A3 U2AF2 PLRG1 PRPF19 CRNKL1 PRPF18 CDC5L DDX46 ACIN1 DDX42 DHX15 RBM25 PPIL1 HSPA1A TCERG1
path:hsa04071	Sphingolipid signaling pathway	22	110	0.2	0.3142	0.589929	FCER1G GNAQ PIK3R3 SPHK1 SGMS1 TNFRSF1A S1PR3 ADORA3 MAP3K5 FYN CTSD GNAI1 BID PPP2R2D ASAH1 TP53 AKT2 PLD1 MAPK10 S1PR1 DEGS2 GNA13
path:hsa04072	Phospholipase D signaling pathway	27	136	0.2	0.321135	0.589929	FCER1G F2R PDGFC AGPAT1 LPAR1 PIK3R3 SPHK1 LPAR6 RRAS FYN CYTH1 AGPAT5 PTK2B PIP5K1A PDGFRB KIT RALGDS SOS2 PLA2G4A AKT2 PIK3CG PLD1 PDGFRA PLA2G4C MRAS ADCY3 GNA13
path:hsa04919	Thyroid hormone signaling pathway	23	116	0.2	0.328999	0.589929	HDAC3 PIK3R3 ATP1B1 KAT2A ITGAV PLCD1 RXRB MED4 RCAN2 MED24 MDM2 HIF1A MED17 CTNNB1 SIN3A NCOA3 TP53 AKT2 CCND1 TBC1D4 STAT1 FOXO1 MYH6
path:hsa04932	Non-alcoholic fatty liver disease (NAFLD)	28	141	0.2	0.319213	0.589929	UQCRC1 NR1H3 UQCR10 CEBPA PIK3R3 TNFRSF1A IRS2 MAP3K5 NDUFA11 NDUFB6 UQCRFS1 BID NDUFAB1 CYCS MLXIP FASLG SDHD CYC1 AKT2 ADIPOR2 COX8A NDUFB5 IL1B MAPK10 FAS COX8C ADIPOQ IL6
path:hsa05167	Kaposis sarcoma-associated herpesvirus infection	36	182	0.2	0.317393	0.589929	HCK GNB2 CCR5 C3 NFKBIA PIK3R3 CHUK TNFRSF1A CCR1 PREX1 CXCL1 GNG10 GNG12 HIF1A GNG11 BID CTNNB1 CYCS TP53 HLA-G CD86 AKT2 CALML4 PIK3CG CDK4 JAK2 CCND1 PPP3CC CXCL2 STAT1 MAPK10 FAS CLEC2B GNG5 IL6 FOS
path:hsa00100	Steroid biosynthesis	3	16	0.19	0.351247	0.626223	DHCR24 CYP27B1 LIPA
path:hsa00240	Pyrimidine metabolism	18	92	0.2	0.358134	0.627763	PNP POLD1 POLR2E DCTD POLA2 NME1 NME3 UCK2 POLR2A DCTPP1 POLR1B TK1 PNPT1 POLE3 DPYD TYMP ENTPD6 RRM2
path:hsa00630	Glyoxylate and dicarboxylate metabolism	5	26	0.19	0.358147	0.627763	ACO1 MDH2 GLUL MDH1 DLD
path:hsa04621	NOD-like receptor signaling pathway	31	159	0.19	0.356253	0.627763	TMEM173 IL18 CCL5 NFKBIA CHUK CCL2 CTSB MYD88 TNFAIP3 RIPK2 GBP1 CARD6 GBP3 PYDC1 TLR4 CASP1 NAMPT CXCL1 GBP2 CYBB NOD2 PYCARD CXCL2 STAT1 IL1B RNF31 MAPK10 NLRP6 TXN IL6 GBP5
path:hsa05131	Shigellosis	12	62	0.19	0.374652	0.653025	ARPC1B NFKBIA ABL1 CHUK RHOG RIPK2 FBXW11 ITGB1 NOD2 PFN2 MAPK10 CD44
path:hsa01522	Endocrine resistance	18	93	0.19	0.377328	0.654035	MMP9 PIK3R3 CDKN1B SP1 IGF1 MDM2 SOS2 JAG1 NCOA3 TP53 AKT2 CDK4 CCND1 CDKN2C BIK MAPK10 ADCY3 FOS
path:hsa00120	Primary bile acid biosynthesis	3	17	0.18	0.397775	0.663667	CYP27A1 SCP2 CH25H
path:hsa00330	Arginine and proline metabolism	8	42	0.19	0.386399	0.663667	LAP3 GOT2 OAT CKB ARG2 ALDH9A1 ALDH18A1 CKM
path:hsa00515	Mannose type O-glycan biosynthesis	3	17	0.18	0.397775	0.663667	FKTN B4GALT1 FUT4
path:hsa00601	Glycosphingolipid biosynthesis - lacto and neolacto series	5	27	0.19	0.394645	0.663667	ST8SIA1 B4GALT1 B3GNT4 FUT4 ABO
path:hsa00760	Nicotinate and nicotinamide metabolism	4	22	0.18	0.396715	0.663667	PNP NNMT NAMPT AOX1
path:hsa04614	Renin-angiotensin system	4	22	0.18	0.396715	0.663667	CTSA THOP1 NLN CPA3
path:hsa05216	Thyroid cancer	7	37	0.19	0.389303	0.663667	RXRB NCOA4 TCF7L2 TPR CTNNB1 TP53 CCND1
path:hsa04218	Cellular senescence	30	157	0.19	0.403666	0.664143	IGFBP3 PIK3R3 CDK1 MYBL2 CAPN2 FBXW11 ATM RRAS CCNB1 TRPV4 MDM2 HIPK3 ETS1 HUS1 EIF4EBP1 TP53 HLA-G AKT2 CALML4 CDK4 CCND1 CHEK1 PPP3CC PPP1CC SERPINE1 MRAS CCND2 FOXO1 E2F5 IL6
path:hsa04540	Gap junction	16	84	0.19	0.404446	0.664143	GJA1 PDGFC GNAQ GUCY1A3 LPAR1 TUBA1C CDK1 GUCY1B3 TUBB6 PDGFRB GNAI1 SOS2 TJP1 TUBA1B PDGFRA ADCY3
path:hsa05010	Alzheimers disease	31	162	0.19	0.400199	0.664143	UQCRC1 UQCR10 PSENEN GNAQ HSD17B10 TNFRSF1A CAPN2 NAE1 PSEN1 GAPDH NDUFA11 ATP5B ATP2A3 APP APOE NDUFB6 UQCRFS1 BID NDUFAB1 CYCS SDHD CYC1 LPL CALML4 BACE2 COX8A PPP3CC NDUFB5 IL1B FAS COX8C
path:hsa00970	Aminoacyl-tRNA biosynthesis	8	43	0.19	0.415445	0.675098	RARS NARS KARS VARS2 NARS2 TARS WARS FARSB
path:hsa04015	Rap1 signaling pathway	39	205	0.19	0.414744	0.675098	CSF1R F2R PDGFC GNAQ FYB ID1 LPAR1 PIK3R3 VASP LCP2 EFNA1 FPR1 VEGFC RRAS FGF13 TIAM1 IGF1 ITGB1 SIPA1 PDGFRB GNAI1 KIT SIPA1L2 RALGDS CTNNB1 TEK TLN1 AKT2 CALML4 SIPA1L3 PDGFRA FGF8 KDR PFN2 ITGAM MRAS ADCY3 FGF3 THBS1
path:hsa05169	Epstein-Barr virus infection	36	190	0.19	0.425327	0.687575	VIM NFKBIA HSPB1 PIK3R3 POLR2E CHUK RELB CDK1 NEDD4 IL10 PSMD3 TNFAIP3 FGR CDKN1B RAN POLR2A PSMC2 ADRM1 MDM2 IL10RA PSMC3 SPN YWHAQ TP53 HLA-G AKT2 IL10RB NFKBIE CSNK2A1 YWHAG YWHAE MAPK10 CD44 HSPA1A CR2 IFNG
path:hsa04964	Proximal tubule bicarbonate reclamation	4	23	0.17	0.43708	0.702933	ATP1B1 AQP1 MDH1 CA2
path:hsa00670	One carbon pool by folate	3	18	0.17	0.443691	0.709906	MTHFD1 ATIC MTR
path:hsa00730	Thiamine metabolism	2	13	0.15	0.451009	0.717933	AK4 ALPI
path:hsa04370	VEGF signaling pathway	10	55	0.18	0.458515	0.722508	HSPB1 PIK3R3 SPHK1 SH2D2A MAPKAPK3 PLA2G4A AKT2 PPP3CC KDR PLA2G4C
path:hsa05218	Melanoma	14	76	0.18	0.457017	0.722508	PDGFC MITF PIK3R3 FGF13 IGF1 PDGFRB MDM2 TP53 AKT2 CDK4 CCND1 PDGFRA FGF8 FGF3
path:hsa01523	Antifolate resistance	5	29	0.17	0.467067	0.732286	CHUK GGH ATIC IL1B IL6
path:hsa00534	Glycosaminoglycan biosynthesis - heparan sulfate / heparin	4	24	0.17	0.476791	0.743794	EXTL2 HS3ST3A1 HS3ST2 EXT2
path:hsa04530	Tight junction	30	162	0.19	0.479373	0.744101	ACTN1 VASP TUBA1C MPDZ AMOTL2 NEDD4 PCNA MAP3K5 TIAM1 ITGB1 RAP2C MYH10 MYL12A MAP3K1 TJP2 PPP2R2D CLDN20 CD1B TJP1 ACTR2 EZR TUBA1B CDK4 CCND1 MYH11 MAPK10 MYH13 ARHGAP17 MYH3 MYL2
path:hsa05210	Colorectal cancer	13	72	0.18	0.485887	0.746782	MLH1 PIK3R3 TCF7L2 RALGDS CTNNB1 AXIN1 CYCS APPL1 TP53 AKT2 CCND1 MAPK10 FOS
path:hsa05412	Arrhythmogenic right ventricular cardiomyopathy (ARVC)	13	72	0.18	0.485887	0.746782	GJA1 ITGAV DSC2 TCF7L2 ITGB1 CTNNB1 DSP CACNG8 CTNNA2 SGCA CACNG7 ITGB5 CACNG6
path:hsa05014	Amyotrophic lateral sclerosis (ALS)	9	51	0.18	0.492602	0.752582	GPX1 TNFRSF1B TNFRSF1A MAP3K5 CASP1 BID CYCS TP53 PPP3CC
path:hsa05164	Influenza A	30	163	0.18	0.494485	0.752582	IL18 CXCL10 CCL5 NFKBIA IL33 PIK3R3 CCL2 MYD88 IFNGR2 TNFRSF1A TLR4 DNAJB1 CASP1 KPNA2 CYCS FASLG AKT2 JAK2 HLA-DOB CIITA PYCARD STAT1 IL1B FURIN MAPK10 FAS NXT1 HSPA1A IFNG IL6
path:hsa00020	Citrate cycle (TCA cycle)	5	30	0.17	0.502438	0.755084	ACO1 MDH2 MDH1 DLD SDHD
path:hsa00053	Ascorbate and aldarate metabolism	2	14	0.14	0.503389	0.755084	ALDH9A1 UGT2B17
path:hsa04810	Regulation of actin cytoskeleton	38	206	0.18	0.499077	0.755084	CD14 ACTN1 CYFIP1 F2R ARPC1B PDGFC PIK3R3 ITGAV FN1 RRAS FGF13 TIAM1 ITGB1 LIMK1 PIP5K1A PDGFRB SPATA13 NCKAP1L GNG12 IQGAP2 MYH10 PAK1 SOS2 MYL12A NCKAP1 EZR PAK3 PIP4K2A PDGFRA FGF8 PPP1CC PFN2 ITGAM ITGB5 MRAS GNA13 MYL2 FGF3
path:hsa04750	Inflammatory mediator regulation of TRP channels	16	89	0.18	0.507386	0.757437	GNAQ PRKCQ PIK3R3 IL1R1 PTGER4 IGF1 PRKCH TRPV4 PLA2G4A CALML4 PPP1CC IL1B PTGER2 MAPK10 PLA2G4C ADCY3
path:hsa03010	Ribosome	23	127	0.18	0.517053	0.768193	MRPL34 MRPL27 RPS2 MRPL17 RPS27 MRPL11 MRPL32 RPLP2 MRPL15 MRPS18C MRPL3 RPL7A RPS24 RPLP0 RPS11 RPS4Y1 MRPL13 RPL29 RPL36 RPL38 MRPS15 RPL14 RPLP1
path:hsa04722	Neurotrophin signaling pathway	21	117	0.18	0.52978	0.783371	NFKBIA ABL1 PIK3R3 RPS6KA3 SH2B3 RIPK2 PSEN1 MAP3K5 SOS2 RPS6KA1 MAP3K1 TP53 FASLG CAMK4 AKT2 CALML4 NFKBIE IRAK3 YWHAE ARHGDIA MAPK10
path:hsa00410	beta-Alanine metabolism	5	31	0.16	0.536933	0.786493	ALDH1A3 DPYD ALDH9A1 ACADM EHHADH
path:hsa05213	Endometrial cancer	10	58	0.17	0.53501	0.786493	MLH1 PIK3R3 TCF7L2 SOS2 CTNNB1 AXIN1 TP53 AKT2 CCND1 CTNNA2
path:hsa04022	cGMP-PKG signaling pathway	29	161	0.18	0.545097	0.794721	GNAQ GUCY1A3 ATP1B1 VASP GUCY1B3 PPIF ATF6B IRS2 ATP2B4 ADORA3 EDNRA ADRA2A GNAI1 ATP2A3 GTF2I AKT2 CALML4 PIK3CG PPP3CC PPP1CC PDE3B KCNMB4 KCNJ8 ADRA1B ADCY3 GNA13 CREB3L3 MEF2C MYH7
path:hsa00450	Selenocompound metabolism	2	15	0.13	0.553053	0.80257	PAPSS2 MTR
path:hsa04350	TGF-beta signaling pathway	14	81	0.17	0.564835	0.815873	ID2 RBX1 DCN ID1 SMAD1 NBL1 ACVR1 SMAD7 SP1 BMP8B BAMBI E2F5 IFNG THBS1
path:hsa04923	Regulation of lipolysis in adipocytes	9	54	0.17	0.571206	0.819555	PIK3R3 MGLL IRS2 GNAI1 FABP4 PLA2G16 AKT2 PDE3B ADCY3
path:hsa05211	Renal cell carcinoma	11	65	0.17	0.572638	0.819555	RBX1 PIK3R3 HIF1A PAK1 SOS2 ETS1 EPAS1 EGLN3 AKT2 PAK3 ARNT2
path:hsa04150	mTOR signaling pathway	25	142	0.18	0.585686	0.830609	FNIP2 FZD7 PIK3R3 CHUK RPS6KA3 LRP6 RRAGD SLC7A5 SLC3A2 TNFRSF1A ATP6V1B2 ATP6V1F FZD6 WNT2 IGF1 SOS2 RPS6KA1 EIF4EBP1 STRADB AKT2 LPIN1 ATP6V1G1 WNT5A FZD2 SGK1
path:hsa04666	Fc gamma R-mediated phagocytosis	14	82	0.17	0.585503	0.830609	HCK ASAP2 ARPC1B PIK3R3 VASP SPHK1 LIMK1 PIP5K1A PAK1 PLA2G4A INPPL1 AKT2 WASF3 PLD1
path:hsa04520	Adherens junction	11	66	0.17	0.595514	0.836939	ACTN1 SNAI2 FYN TCF7L2 PTPRM CTNNB1 TJP1 WASF3 CSNK2A1 CTNNA2 SSX2IP
path:hsa05224	Breast cancer	26	148	0.18	0.594269	0.836939	FZD7 PIK3R3 LRP6 FGF13 FZD6 SP1 BRCA1 WNT2 TCF7L2 IGF1 KIT SOS2 CTNNB1 JAG1 AXIN1 NCOA3 TP53 AKT2 HEY1 CDK4 CCND1 FGF8 WNT5A FZD2 FGF3 FOS
path:hsa04930	Type II diabetes mellitus	7	44	0.16	0.598224	0.836977	HK1 PIK3R3 SOCS2 IRS2 HK3 MAPK10 ADIPOQ
path:hsa04270	Vascular smooth muscle contraction	20	116	0.17	0.606718	0.845072	PLA2G2D GNAQ GUCY1A3 PRKCQ RAMP3 GUCY1B3 EDNRA PRKCH CALD1 PLA2G4A CALML4 PPP1CC MYH11 KCNMB4 PLA2G4C ADRA1B ADCY3 GNA13 CYP4A22 PLA2G2A
path:hsa00340	Histidine metabolism	3	22	0.14	0.612186	0.848898	HNMT ALDH1A3 ALDH9A1
path:hsa00190	Oxidative phosphorylation	20	117	0.17	0.623548	0.855598	UQCRC1 UQCR10 ATP6V0B PPA2 ATP6AP1 ATP6V1B2 ATP6V1F PPA1 NDUFA11 ATP5B NDUFB6 ATP6V0E1 UQCRFS1 NDUFAB1 SDHD CYC1 COX8A ATP6V1G1 NDUFB5 COX8C
path:hsa00830	Retinol metabolism	7	45	0.16	0.625245	0.855598	ALDH1A1 DHRS3 ADH5 CYP26A1 AOX1 UGT2B17 SDR16C5
path:hsa04744	Phototransduction	4	28	0.14	0.623309	0.855598	PDE6G GRK1 CALML4 SLC24A1
path:hsa00430	Taurine and hypotaurine metabolism	1	11	0.091	0.639059	0.867228	CDO1
path:hsa00910	Nitrogen metabolism	2	17	0.12	0.642877	0.867228	GLUL CA2
path:hsa04144	Endocytosis	40	228	0.18	0.641602	0.867228	DAB2 AP2S1 ASAP2 CCR5 CAV1 ARPC1B ARF5 HGS NEDD4 PDCD6IP VPS25 RAB7A CAV2 TSG101 DNAJC6 IL2RB EHD2 VPS28 CYTH1 PIP5K1A ACAP2 MDM2 RAB11B RAB31 SNX6 HLA-G STAM VPS26A GRK1 PLD1 CAPZA1 PDGFRA WWP1 PSD4 ARFGAP2 STAM2 ARRB1 HSPA1A SMAP1 SH3GL2
path:hsa04970	Salivary secretion	14	85	0.16	0.644862	0.867228	LYZ GNAQ GUCY1A3 ATP1B1 GUCY1B3 CST3 ATP2B4 VAMP2 CALML4 HTN3 STATH HTN1 ADRA1B ADCY3
path:hsa04710	Circadian rhythm	4	29	0.14	0.65586	0.878233	RBX1 CRY1 BHLHE40 FBXW11
path:hsa05214	Glioma	11	70	0.16	0.680865	0.90782	PIK3R3 IGF1 PDGFRB MDM2 SOS2 TP53 AKT2 CALML4 CDK4 CCND1 PDGFRA
path:hsa00040	Pentose and glucuronate interconversions	2	19	0.11	0.719135	0.927149	CRYL1 UGT2B17
path:hsa01521	EGFR tyrosine kinase inhibitor resistance	12	77	0.16	0.706021	0.927149	PDGFC PIK3R3 AXL IGF1 PDGFRB SOS2 EIF4EBP1 AKT2 JAK2 PDGFRA KDR IL6
path:hsa04215	Apoptosis - multiple species	4	31	0.13	0.715316	0.927149	TNFRSF1A BID CYCS MAPK10
path:hsa04914	Progesterone-mediated oocyte maturation	14	88	0.16	0.69953	0.927149	PIK3R3 CDK1 RPS6KA3 IGF1 MAD2L1 CCNB1 GNAI1 RPS6KA1 SPDYE1 CDC23 AKT2 PDE3B MAPK10 ADCY3
path:hsa04960	Aldosterone-regulated sodium reabsorption	5	37	0.14	0.7169	0.927149	PIK3R3 ATP1B1 IGF1 NR3C2 SGK1
path:hsa04973	Carbohydrate digestion and absorption	5	37	0.14	0.7169	0.927149	HK1 PIK3R3 ATP1B1 HK3 AKT2
path:hsa05220	Chronic myeloid leukemia	12	77	0.16	0.706021	0.927149	NFKBIA ABL1 PIK3R3 CHUK CTBP2 CDKN1B MDM2 SOS2 TP53 AKT2 CDK4 CCND1
path:hsa05410	Hypertrophic cardiomyopathy (HCM)	13	83	0.16	0.711393	0.927149	ITGAV IGF1 ITGB1 TPM4 CACNG8 SGCA CACNG7 ITGB5 CACNG6 MYL2 MYH6 IL6 MYH7
path:hsa04213	Longevity regulating pathway - multiple species	9	61	0.15	0.729762	0.92933	PIK3R3 IRS2 IGF1 CRYAB AKT2 HSPA1A ADCY3 FOXO1 SOD2
path:hsa04550	Signaling pathways regulating pluripotency of stem cells	22	135	0.16	0.726864	0.92933	ID2 FZD7 ID1 PIK3R3 SMAD1 ACVR1 PCGF6 FZD6 WNT2 IGF1 CTNNB1 AXIN1 LIFR SKIL AKT2 TCF3 JAK2 WNT5A LHX5 PCGF5 SMARCAD1 FZD2
path:hsa04721	Synaptic vesicle cycle	9	61	0.15	0.729762	0.92933	AP2S1 ATP6V0B ATP6V1B2 ATP6V1F UNC13B VAMP2 STXBP1 ATP6V0E1 ATP6V1G1
path:hsa04622	RIG-I-like receptor signaling pathway	10	67	0.15	0.733546	0.930351	TMEM173 CXCL10 NFKBIA CHUK PIN1 SIKE1 RNF125 MAP3K1 ISG15 MAPK10
path:hsa00532	Glycosaminoglycan biosynthesis - chondroitin sulfate / dermatan sulfate	2	20	0.1	0.752213	0.930664	CHST14 CSGALNACT1
path:hsa00562	Inositol phosphate metabolism	11	73	0.15	0.737381	0.930664	INPP5E MINPP1 PLCD1 INPP5K IMPA1 PIP5K1A TPI1 INPPL1 INPP4B PIK3CG PIP4K2A
path:hsa04730	Long-term depression	8	56	0.14	0.74629	0.930664	GNAQ GUCY1A3 GUCY1B3 IGF1 GNAI1 PLA2G4A PLA2G4C GNA13
path:hsa04922	Glucagon signaling pathway	15	97	0.15	0.752634	0.930664	GNAQ PGAM1 PPP4C PYGL FBP1 PGAM2 AKT2 ACACA CALML4 PPP3CC PDE3B LDHA LDHB FOXO1 CREB3L3
path:hsa04962	Vasopressin-regulated water reabsorption	6	44	0.14	0.742407	0.930664	VAMP2 RAB11B DCTN2 ARHGDIA ADCY3 CREB3L3
path:hsa05100	Bacterial invasion of epithelial cells	11	74	0.15	0.754673	0.930664	CAV1 ARPC1B SEPT8 PIK3R3 FN1 RHOG CAV2 ITGB1 CTNNB1 SEPT6 CTNNA2
path:hsa05217	Basal cell carcinoma	9	62	0.15	0.748871	0.930664	FZD7 FZD6 WNT2 TCF7L2 CTNNB1 AXIN1 TP53 WNT5A FZD2
path:hsa04724	Glutamatergic synapse	17	109	0.16	0.760005	0.933549	GNB2 GNAQ GLUL SHANK3 GNG10 GNAI1 GNG12 GNG11 PLA2G4A HOMER1 PLD1 SLC1A3 PPP3CC PLA2G4C GNG5 ADCY3 SHANK1
path:hsa00533	Glycosaminoglycan biosynthesis - keratan sulfate	1	14	0.071	0.768455	0.936555	B4GALT1
path:hsa04664	Fc epsilon RI signaling pathway	9	63	0.14	0.767035	0.936555	FCER1G PIK3R3 LCP2 FYN SOS2 PLA2G4A AKT2 MAPK10 PLA2G4C
path:hsa05310	Asthma	3	27	0.11	0.772188	0.937442	FCER1G IL10 HLA-DOB
path:hsa04725	Cholinergic synapse	17	111	0.15	0.786672	0.947651	GNB2 GNAQ PIK3R3 FYN GNG10 GNAI1 GNG12 GNG11 KCNJ2 CAMK4 AKT2 PIK3CG JAK2 GNG5 ADCY3 CREB3L3 FOS
path:hsa04913	Ovarian steroidogenesis	6	46	0.13	0.784225	0.947651	CYP1B1 IGF1 PLA2G4A AKR1C3 PLA2G4C ADCY3
path:hsa04152	AMPK signaling pathway	18	118	0.15	0.801521	0.959615	PIK3R3 IRS2 IGF1 FBP1 RAB11B PPP2R2D EIF4EBP1 CD36 STRADB EEF2 AKT2 ACACA ADIPOR2 CCND1 TBC1D1 FOXO1 CREB3L3 ADIPOQ
path:hsa04910	Insulin signaling pathway	21	136	0.15	0.808553	0.959615	HK1 PIK3R3 SOCS2 PRKAR2B PYGL IRS2 INPP5K MKNK1 FBP1 SOS2 HK3 INPPL1 EIF4EBP1 AKT2 MKNK2 ACACA CALML4 PPP1CC PDE3B MAPK10 FOXO1
path:hsa04977	Vitamin digestion and absorption	2	22	0.091	0.808906	0.959615	TCN2 SLC19A2
path:hsa05414	Dilated cardiomyopathy (DCM)	13	89	0.15	0.80433	0.959615	ITGAV IGF1 ITGB1 TPM4 CACNG8 SGCA CACNG7 ITGB5 ADCY3 CACNG6 MYL2 MYH6 MYH7
path:hsa04360	Axon guidance	27	172	0.16	0.822482	0.972024	SEMA5A CXCL12 ABL1 PIK3R3 ROBO1 EFNA1 SEMA5B DPYSL2 EFNB2 NTN3 RRAS FYN SEMA4C ITGB1 LIMK1 SLIT2 GNAI1 PAK1 PAK3 RASA1 FES PPP3CC SEMA3C NTN4 ABLIM1 WNT5A EPHB1
path:hsa04146	Peroxisome	11	79	0.14	0.829363	0.976458	PEX12 ACSL3 GSTK1 ACSL1 AGPS SLC27A2 PEX11B SCP2 PHYH EHHADH SOD2
path:hsa00140	Steroid hormone biosynthesis	5	44	0.11	0.857535	0.983643	HSD11B1 CYP1B1 SRD5A3 AKR1C3 UGT2B17
path:hsa00260	Glycine, serine and threonine metabolism	4	37	0.11	0.848653	0.983643	ALAS1 PGAM1 DLD PGAM2
path:hsa01040	Biosynthesis of unsaturated fatty acids	1	17	0.059	0.855456	0.983643	ACOT4
path:hsa03020	RNA polymerase	3	30	0.1	0.840052	0.983643	POLR2E POLR2A POLR1B
path:hsa05012	Parkinsons disease	18	123	0.15	0.854786	0.983643	UQCRC1 UQCR10 PPIF NDUFA11 ATP5B GNAI1 UBE2G2 NDUFB6 UQCRFS1 NDUFAB1 CYCS SDHD CYC1 COX8A NDUFB5 COX8C LRRK2 TH
path:hsa05016	Huntingtons disease	28	181	0.15	0.850315	0.983643	UQCRC1 UQCR10 GPX1 AP2S1 GNAQ POLR2E PPIF SP1 NDUFA11 ATP5B POLR2A NDUFB6 UQCRFS1 NDUFAB1 SIN3A CYCS TP53 SDHD CYC1 DCTN2 TFAM COX8A NDUFB5 TAF4 DNAH17 COX8C CREB3L3 SOD2
path:hsa05212	Pancreatic cancer	10	75	0.13	0.854985	0.983643	PIK3R3 CHUK RALGDS TP53 AKT2 PLD1 CDK4 CCND1 STAT1 MAPK10
path:hsa00650	Butanoate metabolism	2	25	0.08	0.873142	0.986232	HADH EHHADH
path:hsa03015	mRNA surveillance pathway	11	83	0.13	0.875597	0.986232	ETF1 SMG7 FIP1L1 EIF4A3 PPP2R2D ACIN1 CSTF2T RNMT MSI2 PPP1CC NXT1
path:hsa04912	GnRH signaling pathway	12	89	0.13	0.874347	0.986232	GNAQ MAP3K4 MMP14 PTK2B SOS2 PLA2G4A MAP3K1 CALML4 PLD1 MAPK10 PLA2G4C ADCY3
path:hsa04915	Estrogen signaling pathway	13	95	0.14	0.873464	0.986232	MMP9 GNAQ PIK3R3 ATF6B SP1 GNAI1 SOS2 AKT2 CALML4 HSPA1A ADCY3 CREB3L3 FOS
path:hsa04916	Melanogenesis	14	100	0.14	0.863184	0.986232	FZD7 GNAQ MITF FZD6 WNT2 TCF7L2 GNAI1 KIT CTNNB1 CALML4 WNT5A FZD2 ADCY3 CREB3L3
path:hsa04140	Autophagy - animal	17	120	0.14	0.881043	0.988796	LAMP2 PRKCQ PIK3R3 CTSB RRAGD RAB7A IRS2 RRAS CTSD ATG4D DAPK1 HIF1A DAPK3 AKT2 BNIP3 MAPK10 MRAS
path:hsa00512	Mucin type O-glycan biosynthesis	2	26	0.077	0.88985	0.995101	GALNT7 B4GALT5
path:hsa00900	Terpenoid backbone biosynthesis	1	22	0.045	0.93682	0.999996	ZMPSTE24
path:hsa02010	ABC transporters	2	43	0.047	0.99218	0.999996	ABCG1 ABCA1
path:hsa04012	ErbB signaling pathway	9	83	0.11	0.962219	0.999996	ABL1 PIK3R3 CDKN1B PAK1 SOS2 EIF4EBP1 AKT2 PAK3 MAPK10
path:hsa04020	Calcium signaling pathway	20	178	0.11	0.995447	0.999996	F2R GNAQ SPHK1 ORAI1 PPIF PLCD1 ATP2B4 EDNRA PTK2B PDGFRB ATP2A3 GNA15 CAMK4 CALML4 PDGFRA PPP3CC ADRA1B ADCY3 TNNC2 P2RX1
path:hsa04024	cAMP signaling pathway	24	191	0.13	0.98546	0.999996	F2R NFKBIA PIK3R3 ATP1B1 SUCNR1 ORAI1 ATP2B4 EDNRA RRAS TIAM1 GNAI1 PAK1 CAMK4 AKT2 CALML4 PLD1 PPP1CC PTGER2 PDE3B MAPK10 ADCY3 CREB3L3 SSTR5 FOS
path:hsa04070	Phosphatidylinositol signaling system	12	98	0.12	0.941164	0.999996	PPIP5K2 PIK3R3 INPP5E PLCD1 INPP5K IMPA1 PIP5K1A INPPL1 CALML4 INPP4B PIP4K2A TMEM55A
path:hsa04080	Neuroactive ligand-receptor interaction	26	269	0.097	0.999973	0.999996	P2RY13 F2R LPAR1 GZMA TSPO P2RY14 LPAR6 APLNR FPR3 FPR1 S1PR3 PTGER4 ADORA3 EDNRA ADRA2A C5AR1 C3AR1 GABRB2 PTGER2 NMUR1 S1PR1 GALR2 ADRA1B P2RY8 SSTR5 P2RX1
path:hsa04136	Autophagy - other	1	29	0.034	0.981315	0.999996	ATG4D
path:hsa04261	Adrenergic signaling in cardiomyocytes	20	144	0.14	0.921212	0.999996	GNAQ ATP1B1 ATF6B ATP2B4 TPM4 GNAI1 PPP2R2D AKT2 CALML4 PIK3CG CACNG8 PPP1CC CACNG7 ADRA1B ADCY3 CACNG6 MYL2 CREB3L3 MYH6 MYH7
path:hsa04340	Hedgehog signaling pathway	4	43	0.093	0.925558	0.999996	FBXW11 CCND1 ARRB1 CCND2
path:hsa04713	Circadian entrainment	12	96	0.12	0.929789	0.999996	GNB2 GNAQ GUCY1A3 GUCY1B3 GNG10 GNAI1 GNG12 GNG11 CALML4 GNG5 ADCY3 FOS
path:hsa04720	Long-term potentiation	7	67	0.1	0.950399	0.999996	GNAQ RPS6KA3 RPS6KA1 CAMK4 CALML4 PPP3CC PPP1CC
path:hsa04723	Retrograde endocannabinoid signaling	15	138	0.11	0.991484	0.999996	GNB2 GNAQ MGLL NDUFA11 GNG10 GNAI1 GNG12 NDUFB6 GNG11 NDUFAB1 GABRB2 NDUFB5 MAPK10 GNG5 ADCY3
path:hsa04726	Serotonergic synapse	11	107	0.1	0.987463	0.999996	GNB2 GNAQ GNG10 GNAI1 GNG12 APP GNG11 PLA2G4A GABRB2 PLA2G4C GNG5
path:hsa04727	GABAergic synapse	10	87	0.11	0.950816	0.999996	GNB2 GLUL GNG10 SLC38A5 GNAI1 GNG12 GNG11 GABRB2 GNG5 ADCY3
path:hsa04728	Dopaminergic synapse	18	130	0.14	0.910114	0.999996	GNB2 GNAQ ATF6B GNG10 GNAI1 GNG12 GNG11 PPP2R2D AKT2 CALML4 PPP3CC PPP1CC MAPK10 CALY GNG5 CREB3L3 TH FOS
path:hsa04740	Olfactory transduction	5	117	0.043	0.999996	0.999996	CALML4 ARRB1 OR51E1 ADCY3 OR2L2
path:hsa04742	Taste transduction	2	71	0.028	0.999941	0.999996	SCN2A CALHM1
path:hsa04911	Insulin secretion	8	84	0.095	0.984164	0.999996	GNAQ ATP1B1 ATF6B VAMP2 TRPM4 KCNMB4 ADCY3 CREB3L3
path:hsa04918	Thyroid hormone synthesis	9	73	0.12	0.89937	0.999996	GPX1 GNAQ ATP1B1 GPX8 ATF6B GPX3 GPX2 ADCY3 CREB3L3
path:hsa04921	Oxytocin signaling pathway	21	149	0.14	0.915212	0.999996	GNAQ GUCY1A3 GUCY1B3 GNAI1 PLA2G4A KCNJ2 CAMK4 EEF2 CALML4 PIK3CG CCND1 CACNG8 PPP3CC PPP1CC CAMK1 PLA2G4C CACNG7 ADCY3 CACNG6 MEF2C FOS
path:hsa04925	Aldosterone synthesis and secretion	8	82	0.098	0.980046	0.999996	GNAQ ORAI1 ATF6B CAMK4 CALML4 CAMK1 ADCY3 CREB3L3
path:hsa04950	Maturity onset diabetes of the young	1	24	0.042	0.955127	0.999996	NKX6-1
path:hsa04961	Endocrine and other factor-regulated calcium reabsorption	3	47	0.064	0.984478	0.999996	AP2S1 GNAQ ATP1B1
path:hsa04971	Gastric acid secretion	9	74	0.12	0.908226	0.999996	GNAQ ATP1B1 KCNJ10 CA2 GNAI1 KCNJ2 EZR CALML4 ADCY3
path:hsa04972	Pancreatic secretion	9	91	0.099	0.984131	0.999996	PLA2G2D GNAQ ATP1B1 CA2 ATP2B4 ATP2A3 CPA3 ADCY3 PLA2G2A
path:hsa04976	Bile secretion	6	67	0.09	0.977965	0.999996	ATP1B1 AQP1 AQP9 CA2 EPHX1 ADCY3
path:hsa05030	Cocaine addiction	4	49	0.082	0.965567	0.999996	ATF6B GNAI1 CREB3L3 TH
path:hsa05031	Amphetamine addiction	8	68	0.12	0.911598	0.999996	ATF6B CAMK4 CALML4 PPP3CC PPP1CC CREB3L3 TH FOS
path:hsa05032	Morphine addiction	11	88	0.12	0.918635	0.999996	GNB2 GNG10 PDE7A GNAI1 GNG12 GNG11 GABRB2 PDE3B ARRB1 GNG5 ADCY3
path:hsa05033	Nicotine addiction	1	38	0.026	0.996344	0.999996	GABRB2
path:hsa05160	Hepatitis C	15	125	0.12	0.970553	0.999996	NR1H3 NFKBIA PIK3R3 CHUK TNFRSF1A SOS2 CD81 PPP2R2D CLDN20 TP53 AKT2 STAT1 MAPK10 IFIT1 IRF1
path:hsa05223	Non-small cell lung cancer	7	66	0.11	0.944696	0.999996	PIK3R3 RXRB SOS2 TP53 AKT2 CDK4 CCND1

## Sheet: Supplementary Table 4
Supplementary Table 4. All KEGG pathway enrichment results in mantle cell lymphoma.
PathwayID	PathwayName	Count	Size	Percent	Pvalue	FDR	GeneSymbol
path:hsa04610	Complement and coagulation cascades	36	77	0.47	5.0395e-10	1.57232e-07	VSIG4 PLAUR F8 PLAU F2R CFH SERPINA1 C1R CFI C1QB F5 SERPING1 PLAT C3 VWF C2 C1QA SERPINE1 C3AR1 C1QC PROCR PROS1 F13A1 C1S CD46 C5AR1 TFPI C7 A2M THBD F3 CLU SERPINB2 CD59 ITGAM CFD
path:hsa04060	Cytokine-cytokine receptor interaction	74	252	0.29	7.09669e-07	0.000110708	CCL8 CSF3R CCL18 IFNGR2 CCL17 ACVR1 TNFSF13B PDGFRA IL12B LIF IL1R1 IL10 CCL27 IL18RAP CXCL10 CXCL11 CCR5 CSF1R IL1R2 TNFRSF1A FASLG IL7R CCL19 CX3CR1 IL22RA2 CXCL9 CCL4 CCR7 PDGFC CXCR6 OSMR INHBA CXCL12 IL17C IL18 CX3CL1 CXCL13 VEGFC CXCL1 CCL5 CCR10 CCL2 IL13RA1 LTA IL2RB IL10RA CD70 PDGFRB BMP2 KDR CCR1 CSF2RA CXCL14 TNFRSF1B TNFRSF9 XCL1 IL1B CCL22 TNFRSF11B TNFRSF21 CXCL2 IL10RB CCR2 IL15 I…
path:hsa04115	p53 signaling pathway	27	66	0.41	1.56417e-06	0.000162674	STEAP3 CYCS CD82 EI24 SERPINE1 ATM MDM2 MDM4 IGF1 CCNG1 THBS1 SESN1 TP53I3 BID IGFBP3 CDK4 GORAB PPM1D TP53 CCND1 CCNB1 CDK1 CCND2 FAS CHEK1 SFN RRM2
path:hsa05144	Malaria	20	44	0.45	3.23439e-06	0.000252282	MYD88 COMP IL10 THBS2 TLR4 SELP CD81 TLR2 IL18 VCAM1 SDC2 CCL2 THBS1 CD36 IL1B SELE HBB IFNG KLRB1 IL6
path:hsa05143	African trypanosomiasis	16	32	0.5	4.4171e-06	0.000275627	MYD88 IDO1 IDO2 IL12B IL10 THOP1 GNAQ FASLG IL18 VCAM1 IL1B SELE HBB IFNG FAS IL6
path:hsa04216	Ferroptosis	18	39	0.46	6.48464e-06	0.000337201	FTL NCOA4 ACSL3 STEAP3 SLC40A1 SLC7A11 SLC3A2 GPX4 HMOX1 CYBB MAP1LC3A GCLC GCLM FTH1 SAT1 ACSL1 CP TP53
path:hsa00270	Cysteine and methionine metabolism	19	44	0.43	1.39082e-05	0.000619908	MDH1 ENOPH1 GOT2 MDH2 MAT2B AHCY DNMT1 BHMT CDO1 MTR GCLC IL4I1 GCLM ADI1 LDHA LDHB CTH BCAT1 TST
path:hsa05134	Legionellosis	21	52	0.4	2.13358e-05	0.000832096	MYD88 IL12B RAB1B CYCS TLR5 C3 NFKBIA VCP TLR4 CD14 TLR2 IL18 CXCL1 BNIP3 CASP1 IL1B PYCARD CXCL2 ITGAM IL6 HSPA1A
path:hsa05150	Staphylococcus aureus infection	20	49	0.41	2.58313e-05	0.000895485	FPR1 FPR3 CFH IL10 C1R CFI C1QB SELPLG C3 SELP C2 C1QA C3AR1 C1QC C1S C5AR1 FCGR3B HLA-DOB ITGAM CFD
path:hsa05323	Rheumatoid arthritis	28	81	0.35	5.1337e-05	0.00160171	MMP3 MMP1 CTSK TNFSF13B TEK ATP6V0B TLR4 ATP6AP1 CXCL12 ATP6V1B2 TLR2 IL18 CD28 CTLA4 ATP6V1F CXCL1 CCL5 CCL2 ATP6V1G1 ATP6V0E1 ACP5 HLA-DOB IL1B CD86 IL15 CD80 IFNG IL6
path:hsa00520	Amino sugar and nucleotide sugar metabolism	19	48	0.4	6.5156e-05	0.00184806	NPL HK3 GNPDA1 HK1 CYB5R2 CHIT1 TSTA3 GFPT2 FUK NANP HEXB GPI RENBP UAP1 NAGK UXS1 GMDS PGM1 FPGT
path:hsa05340	Primary immunodeficiency	15	36	0.42	0.000139459	0.00362593	ORAI1 CD3D IL7R CD8B CD8A CD3E ICOS CD4 RFXANK CIITA CD79A ADA ZAP70 LCK AICDA
path:hsa04062	Chemokine signaling pathway	48	172	0.28	0.000185816	0.003927	CCL8 CCL18 CCL17 HCK CCL27 GNB2 CXCL10 AKT2 CXCL11 CCR5 CHUK NFKBIA ARRB1 CCL19 CX3CR1 CXCL9 CCL4 CCR7 ITK CXCR6 CXCL12 PIK3R3 GNG12 CX3CL1 CXCL13 PAK1 PREX1 GNG10 CXCL1 CCL5 CCR10 TIAM1 CCL2 JAK2 GNAI1 CCR1 ADCY3 GNG5 CXCL14 XCL1 PTK2B CCL22 CXCL2 CCR2 STAT1 FGR CCL21 GNG11
path:hsa04668	TNF signaling pathway	33	107	0.31	0.000188798	0.003927	MMP3 CEBPB MMP14 MAPK10 LIF CXCL10 AKT2 CHUK TNFRSF1A ATF6B NFKBIA MMP9 TNFAIP3 PIK3R3 CX3CL1 JAG1 VCAM1 VEGFC CXCL1 CCL5 CCL2 LTA MAP3K5 TNFRSF1B NOD2 IL1B CXCL2 SELE IL15 IL18R1 MLKL FAS IL6
path:hsa05142	Chagas disease (American trypanosomiasis)	31	98	0.32	0.000164174	0.003927	MYD88 IFNGR2 CD3G MAPK10 GNA15 IL12B IL10 AKT2 C1QB CD3D C3 CHUK TNFRSF1A GNAQ NFKBIA FASLG TLR4 C1QA SERPINE1 PIK3R3 C1QC TLR2 CD3E CD247 CCL5 CCL2 GNAI1 IL1B IFNG FAS IL6
path:hsa05146	Amoebiasis	29	94	0.31	0.000403657	0.00787131	RAB7A COL3A1 FN1 COL1A2 COL4A1 GNA15 IL12B ARG2 IL1R1 IL10 IL1R2 GNAQ TLR4 COL4A2 CD14 PIK3R3 LAMB1 TLR2 ACTN1 COL1A1 CXCL1 HSPB1 IL1B LAMC1 LAMB2 SERPINB3 ITGAM IFNG IL6
path:hsa04142	Lysosome	35	120	0.29	0.000436454	0.00801021	CTSK NAPSA LAMP2 CD68 CTSA ACP2 CTSC PPT1 CTSB ATP6V0B AP3M2 SORT1 DNASE2 LIPA GGA2 ATP6AP1 NPC2 HEXB LAMP3 ASAH1 NAGA CTSO PSAP AP4M1 MCOLN1 CTSD LGMN SCARB2 NEU1 ACP5 AP1S2 GLB1 CD63 GNS LAPTM4B
path:hsa05332	Graft-versus-host disease	14	36	0.39	0.000526817	0.00913149	PRF1 HLA-G GZMB FASLG KIR2DL2 HLA-C CD28 HLA-DOB IL1B CD86 CD80 IFNG FAS IL6
path:hsa04940	Type I diabetes mellitus	15	40	0.38	0.000597968	0.0093283	IL12B PRF1 HLA-G GZMB FASLG HLA-C CD28 LTA CPE HLA-DOB IL1B CD86 CD80 IFNG FAS
path:hsa05133	Pertussis	23	71	0.32	0.000588574	0.0093283	MYD88 MAPK10 IL12B IL10 C1R C1QB SERPING1 C3 TLR4 CD14 C2 C1QA C1QC C1S ITGB1 GNAI1 CASP1 IL1B IRF1 PYCARD ITGAM LY96 IL6
path:hsa04110	Cell cycle	35	123	0.28	0.000727439	0.0103164	SMC1A RBX1 CDC23 STAG2 DBF4 YWHAQ ABL1 MCM7 YWHAG PTTG2 PCNA ATM MDM2 TTK CDKN1B ORC4 ANAPC7 ESPL1 MCM5 CDK4 YWHAE MCM2 TP53 MAD2L1 CCND1 CCNB1 CDK1 CDC45 CDC6 CDC7 CCND2 CDC20 CHEK1 SFN BUB1B
path:hsa04978	Mineral absorption	17	48	0.35	0.000698292	0.0103164	FTL MT1E MT2A MT1H CYBRD1 MT1M SLC40A1 MT1F MT1G MT1X STEAP2 SLC31A1 HMOX1 STEAP1 ATP1B1 FTH1 ATOX1
path:hsa04640	Hematopoietic cell lineage	28	93	0.3	0.000763617	0.0103586	CSF3R CD3G IL1R1 CD2 CSF1R IL1R2 CD3D IL7R CD33 CD1B CD14 CD8B CD8A CD34 CD3E CD4 CD22 CD36 HLA-DOB CSF2RA IL1B CD44 CD59 ITGAM CD24 KIT IL7 IL6
path:hsa05322	Systemic lupus erythematosus	30	102	0.29	0.000830541	0.010797	SNRPB IL10 C1R C1QB C3 HIST1H4E C2 C1QA HIST2H2AA3 HIST3H2A C1QC ACTN1 HIST1H4C CD28 C1S C7 FCGR3B HLA-DOB HIST1H4H HIST1H4B HIST1H2AC HIST1H2BK HIST1H2AJ CD86 HIST1H2BI HIST1H3I CD80 HIST1H2AE HIST1H2BF IFNG
path:hsa05418	Fluid shear stress and atherosclerosis	37	133	0.28	0.000874094	0.0109087	NQO1 SUMO4 ACVR1 MAPK10 IL1R1 AKT2 MGST1 IL1R2 SDC4 PLAT CHUK MMP2 GSTM3 TNFRSF1A MMP9 PIK3R3 HMOX1 ITGAV CAV1 VCAM1 SDC2 CCL2 CAV2 MGST3 THBD KDR MAP3K5 ASS1 TXN KEAP1 NCF2 IL1B GSTO1 TP53 SELE IFNG GSTM2
path:hsa00010	Glycolysis / Gluconeogenesis	21	65	0.32	0.00096076	0.0111021	HK3 PGAM1 HK1 FBP1 ALDH1A3 DLD ADH5 GAPDH GALM ACSS2 GPI ALDOA ALDH9A1 TPI1 PGAM2 ENO1 MINPP1 LDHA LDHB PGM1 ENO2
path:hsa05330	Allograft rejection	13	34	0.38	0.000925522	0.0111021	IL12B IL10 PRF1 HLA-G GZMB FASLG HLA-C CD28 HLA-DOB CD86 CD80 IFNG FAS
path:hsa04145	Phagosome	38	139	0.27	0.0011012	0.0122705	RAB7A ITGB5 LAMP2 COMP SEC61B C1R HLA-G ATP6V0B C3 COLEC12 THBS2 TLR4 ATP6AP1 CD14 MRC2 ATP6V1B2 TLR2 HLA-C ITGAV CYBB SEC61A2 TUBA1C ATP6V1F HGS THBS1 ATP6V1G1 ITGB1 ATP6V0E1 CD36 COLEC11 FCGR3B HLA-DOB TUBA1B TUBB6 NCF2 MARCO ITGAM TUBA1A
path:hsa00480	Glutathione metabolism	17	50	0.34	0.00121665	0.0130895	HPGDS GPX8 GPX1 GSTK1 MGST1 GSTM3 PGD LAP3 GPX4 GCLC G6PD GCLM MGST3 GSTO1 GPX3 GSTM2 RRM2
path:hsa03420	Nucleotide excision repair	15	43	0.35	0.0014999	0.0150958	DDB1 POLD1 XPC RBX1 ERCC4 RPA1 RPA4 RPA3 POLE3 PCNA RPA2 CUL4B RFC5 MNAT1 GTF2H2
path:hsa04658	Th1 and Th2 cell differentiation	26	88	0.3	0.00149323	0.0150958	IFNGR2 CD3G MAPK10 IL12B CD3D STAT4 CHUK NFKBIA PRKCQ MAML1 JAG1 CD3E CD247 CD4 IL2RB MAML2 JAK2 MAF HLA-DOB GATA3 ZAP70 NFKBIE STAT1 PPP3CC IFNG LCK
path:hsa03030	DNA replication	13	36	0.36	0.00179027	0.0174551	POLD1 RPA1 POLA2 RPA4 MCM7 RPA3 POLE3 PCNA RPA2 RFC5 MCM5 MCM2 DNA2
path:hsa01100	Metabolic pathways	234	1143	0.2	0.00192414	0.0181919	CYP27B1 CYP26A1 UQCRC1 ACO1 LIPG CYP27A1 POLR2A IMPDH1 MDH1 HPGDS IDO1 SPHK1 POLD1 HK3 B3GNT4 HYAL2 B4GALNT4 PGAM1 SPR IDO2 HSD11B1 GBA3 ACOT4 GNPDA1 CES1 LPCAT2 PLD1 TDO2 ALOX15B ME1 HK1 AK4 IMPA1 ACP2 ACSL3 PRODH HSD17B10 ARG2 PLA2G2D HMBS UGT2B17 INPP5E INPP5K TALDO1 ITPA SDHD BCKDHA AOX1 COQ5 ALLC CKB UQCRFS1 PTGES3 ENOPH1 MTHFD1 UQCR10 PLA2G7 IMPDH2 GOT2 CYCS CYC1 NDUFA11 NNMT PIGA CHIT1 FBP…
path:hsa03430	Mismatch repair	9	22	0.41	0.00205481	0.0188559	MLH1 POLD1 RPA1 RPA4 RPA3 PCNA RPA2 RFC5 EXO1
path:hsa04064	NF-kappa B signaling pathway	25	86	0.29	0.0022806	0.0203299	MYD88 PLAU TNFSF13B IL1R1 CHUK TNFRSF1A NFKBIA RELB PRKCQ CCL19 TLR4 CD14 TNFAIP3 CCL4 CXCL12 ATM VCAM1 LTA IL1B BCL2A1 ZAP70 CXCL2 CCL21 LY96 LCK
path:hsa01524	Platinum drug resistance	21	70	0.3	0.00282072	0.0244462	MLH1 AKT2 MGST1 CYCS REV3L GSTM3 FASLG SLC31A1 PIK3R3 ATM MDM2 POLH MGST3 MAP3K5 BID BRCA1 GSTO1 TP53 TOP2A FAS GSTM2
path:hsa04933	AGE-RAGE signaling pathway in diabetic complications	27	97	0.28	0.00334155	0.0281774	COL3A1 FN1 COL1A2 MAPK10 COL4A1 AKT2 MMP2 COL4A2 PLCD1 SERPINE1 PIK3R3 COL1A1 CYBB VCAM1 VEGFC CDKN1B CCL2 JAK2 THBD F3 CDK4 IL1B SELE STAT1 CCND1 IL6 EGR1
path:hsa05162	Measles	34	129	0.26	0.00353461	0.029021	MYD88 IFNGR2 CD3G IL12B AKT2 CD3D CHUK NFKBIA FASLG PRKCQ TLR4 RAB9B TNFAIP3 PIK3R3 TLR2 FYN CD3E CD28 CDKN1B CD46 IL2RB JAK2 CDK4 IL1B SH2D1A TP53 STAT1 CCND1 TNFSF10 IFNG CCND2 FAS IL6 HSPA1A
path:hsa05145	Toxoplasmosis	29	107	0.27	0.00393595	0.0314876	MYD88 IFNGR2 MAPK10 IL12B IL10 AKT2 CCR5 CYCS CHUK TNFRSF1A NFKBIA TLR4 LAMB1 TLR2 IL10RA ITGB1 JAK2 GNAI1 HLA-DOB CIITA PPIF LAMC1 PIK3CG LAMB2 IL10RB STAT1 IFNG LY96 HSPA1A
path:hsa04512	ECM-receptor interaction	23	81	0.28	0.00438954	0.0342384	ITGB5 FN1 COL1A2 COL4A1 COMP COL6A3 SPP1 TNC SDC4 THBS2 VWF COL4A2 LAMB1 ITGAV COL1A1 COL6A2 THBS1 ITGB1 CD36 CD44 LAMC1 LAMB2 HMMR
path:hsa04066	HIF-1 signaling pathway	26	95	0.27	0.00493526	0.0375561	HK3 IFNGR2 HK1 HIF1A TEK TIMP1 RBX1 AKT2 MKNK1 TLR4 GAPDH SERPINE1 PIK3R3 HMOX1 MKNK2 ALDOA CYBB CDKN1B ENO1 IGF1 EIF4EBP1 EGLN3 LDHA IFNG ENO2 IL6
path:hsa04660	T cell receptor signaling pathway	27	100	0.27	0.00533046	0.0395977	CD3G IL10 AKT2 CD3D CHUK NFKBIA PRKCQ CD8B CD8A ITK PIK3R3 PAK3 FYN CD3E ICOS LCP2 PAK1 CD247 CD28 CTLA4 CD4 CDK4 ZAP70 NFKBIE PPP3CC IFNG LCK
path:hsa05202	Transcriptional misregulation in cancer	42	171	0.25	0.0061079	0.0443178	MMP3 CEBPB MITF PLAU CEBPA TCF3 NUPR1 SIN3A MLLT3 CSF1R IL1R2 SP1 CDK9 PLAT GZMB MAX RXRB CD14 MMP9 ATM MDM2 ID2 CDKN1B SMAD1 IGF1 TAF15 DUSP6 PBX1 IL2RB BCL11B ARNT2 MAF IGFBP3 TSPAN7 BCL2A1 TP53 CD86 HIST1H3I ITGAM CCND2 HPGD IL6
path:hsa04392	Hippo signaling pathway - multiple species	9	25	0.36	0.00629923	0.0446673	LATS1 RASSF4 WWTR1 FRMD6 YAP1 PAK1 TEAD1 RASSF2 LATS2
path:hsa05166	HTLV-I infection	58	250	0.23	0.00679782	0.0471316	WNT2 POLD1 CD3G TCF3 PDGFRA IL1R1 FZD4 AKT2 HLA-G IL1R2 MRAS CD3D CHUK CDC23 TNFRSF1A NFKBIA RELB PTTG2 RAN KAT2A PIK3R3 FZD7 TLN1 POLE3 HLA-C PCNA ATM CD3E POLB VCAM1 TSPO LTA IL2RB ANAPC7 ETS1 TP53INP1 PDGFRB WNT5A HLA-DOB ADCY3 CDK4 RRAS MYBL2 TP53 MAD2L1 FZD6 FZD2 PPP3CC IL15 CCND1 MAP3K1 CCND2 LCK CDC20 CHEK1 BUB1B IL6 EGR1
path:hsa05321	Inflammatory bowel disease (IBD)	18	62	0.29	0.00715913	0.0485576	IFNGR2 IL12B IL10 IL18RAP TLR5 STAT4 TLR4 TLR2 IL18 MAF HLA-DOB GATA3 NOD2 IL1B STAT1 IL18R1 IFNG IL6
path:hsa00062	Fatty acid elongation	7	19	0.37	0.00999786	0.0663688	ELOVL7 ACOT4 ELOVL1 PPT1 HADHB MECR HADH
path:hsa00590	Arachidonic acid metabolism	16	56	0.29	0.0117371	0.0686163	HPGDS GPX8 GPX1 ALOX15B PLA2G2D PTGES3 LTA4H PTGDS PLA2G4A PLA2G2A PLA2G4C PLA2G16 AKR1C3 CBR1 GPX3 CBR3
path:hsa00920	Sulfur metabolism	4	9	0.44	0.0106085	0.0686163	CYCS ETHE1 PAPSS2 TST
path:hsa03050	Proteasome	13	43	0.3	0.0111969	0.0686163	PSMA3 PSMD3 PSMC2 ADRM1 PSMB3 PSMB1 PSMB8 PSMA2 PSMA4 PSMB5 PSMD14 PSMB10 IFNG
path:hsa04620	Toll-like receptor signaling pathway	25	96	0.26	0.0111458	0.0686163	MYD88 CTSK TLR8 MAPK10 IL12B SPP1 CXCL10 AKT2 CXCL11 TLR5 CHUK NFKBIA CXCL9 TLR4 CD14 CCL4 PIK3R3 TLR2 CCL5 IL1B CD86 STAT1 CD80 LY96 IL6
path:hsa05020	Prion diseases	11	35	0.31	0.011815	0.0686163	C1QB C1QA C1QC FYN CCL5 C7 IL1B LAMC1 IL6 EGR1 HSPA1A
path:hsa05152	Tuberculosis	41	172	0.24	0.0112547	0.0686163	CYP27B1 CLEC4E MYD88 RAB7A CEBPB SPHK1 LAMP2 IFNGR2 FCER1G MAPK10 IL12B IL10 AKT2 CYCS RIPK2 ATP6V0B C3 TNFRSF1A TLR4 ATP6AP1 CD14 MRC2 TLR2 IL18 CD74 IL10RA CTSD RFXANK JAK2 FCGR3B HLA-DOB BID NOD2 CIITA IL1B IL10RB STAT1 PPP3CC ITGAM IFNG IL6
path:hsa05205	Proteoglycans in cancer	46	197	0.23	0.0118759	0.0686163	WNT2 ITGB5 PLAUR PLAU PPP1CC FN1 HIF1A IL12B FZD4 AKT2 TIMP3 LUM DCN SDC4 MRAS MMP2 FASLG TLR4 HPSE MMP9 PIK3R3 FZD7 MIR21 TLR2 ITGAV CAV1 PAK1 FLNA MDM2 SDC2 TIAM1 IGF1 CAV2 THBS1 ITGB1 WNT5A KDR EZR CD63 CD44 RRAS TP53 FZD6 FZD2 CCND1 FAS
path:hsa03320	PPAR signaling pathway	19	70	0.27	0.0134299	0.073511	MMP1 CYP27A1 ME1 SLC27A2 ACSL3 NR1H3 PLIN2 RXRB SLC27A1 EHHADH PLTP CD36 SCP2 ACSL1 FABP4 ACADM LPL ADIPOQ FABP5
path:hsa04514	Cell adhesion molecules (CAMs)	33	135	0.24	0.0132936	0.073511	CD2 HLA-G VCAN SDC4 SELPLG SELP CD8B CD8A CD274 SIGLEC1 NRCAM CD34 TIGIT HLA-C ITGAV ICOS VCAM1 SDC2 CD28 CTLA4 CD4 CD22 CLDN20 CDH3 ITGB1 CNTNAP1 HLA-DOB PTPRM CADM1 SELE CD86 CD80 ITGAM
path:hsa05132	Salmonella infection	21	79	0.27	0.0134024	0.073511	MYD88 RAB7A IFNGR2 MAPK10 TLR5 PLEKHM2 TLR4 CD14 ARPC1B RHOG CCL4 IL18 FLNA CXCL1 CASP1 IL1B PYCARD CXCL2 MYH10 IFNG IL6
path:hsa00982	Drug metabolism - cytochrome P450	15	53	0.28	0.0150491	0.0805653	HPGDS FMO2 UGT2B17 AOX1 GSTK1 MGST1 ALDH1A3 GSTM3 ADH5 FMO1 MGST3 FMO4 FMO3 GSTO1 GSTM2
path:hsa04659	Th17 cell differentiation	26	103	0.25	0.0152351	0.0805653	IFNGR2 CD3G HIF1A MAPK10 IL1R1 CD3D CHUK NFKBIA PRKCQ RXRB CD3E CD247 CD4 AHR IL2RB JAK2 HLA-DOB GATA3 IL1B ZAP70 NFKBIE STAT1 PPP3CC IFNG LCK IL6
path:hsa01230	Biosynthesis of amino acids	18	67	0.27	0.0170212	0.0870593	ACO1 PGAM1 ARG2 TALDO1 GOT2 MAT2B GLUL GAPDH MTR ALDOA TPI1 PGAM2 ENO1 ALDH18A1 ASS1 CTH BCAT1 ENO2
path:hsa03460	Fanconi anemia pathway	13	45	0.29	0.0169899	0.0870593	MLH1 PALB2 ERCC4 REV3L RPA1 RPA4 RPA3 RPA2 POLH USP1 BRCA1 RMI1 BRIP1
path:hsa04657	IL-17 signaling pathway	23	90	0.26	0.017339	0.0872543	MMP3 MMP1 CEBPB MAPK6 CCL17 MAPK10 CXCL10 CHUK NFKBIA S100A8 MMP9 TNFAIP3 IL17C CXCL1 CCL2 DEFB4A S100A7 IL1B CXCL2 S100A9 JUND IFNG IL6
path:hsa00380	Tryptophan metabolism	11	37	0.3	0.0187679	0.091433	IDO1 IDO2 TDO2 AOX1 CYP1B1 EHHADH ALDH9A1 GCDH IL4I1 ASMT HADH
path:hsa00565	Ether lipid metabolism	11	37	0.3	0.0187679	0.091433	LPCAT2 PLD1 PLA2G2D PLA2G7 ENPP2 PLA2G4A PLA2G2A PLD3 PLA2G4C PLA2G16 AGPS
path:hsa00860	Porphyrin and chlorophyll metabolism	9	29	0.31	0.0199277	0.091433	HMBS UGT2B17 ALAS1 BLVRB FECH HMOX1 CPOX HCCS CP
path:hsa00983	Drug metabolism - other enzymes	10	33	0.3	0.0194691	0.091433	IMPDH1 CES1 UGT2B17 ITPA IMPDH2 NAT1 UCK2 DPYD TYMP TK1
path:hsa03410	Base excision repair	10	33	0.3	0.0194691	0.091433	POLD1 PARP4 MUTYH XRCC1 TDG POLE3 PCNA POLB MPG NEIL3
path:hsa05140	Leishmaniasis	18	68	0.26	0.019886	0.091433	MYD88 IFNGR2 IL12B IL10 C3 NFKBIA TLR4 TLR2 CYBB ITGB1 JAK2 FCGR3B HLA-DOB NCF2 IL1B STAT1 ITGAM IFNG
path:hsa04380	Osteoclast differentiation	30	125	0.24	0.0215666	0.0975185	CTSK IFNGR2 MITF TREM2 MAPK10 IL1R1 AKT2 CSF1R CHUK TNFRSF1A NFKBIA RELB FHL2 TYROBP PIK3R3 FYN LCP2 LILRB3 ACP5 FCGR3B NCF2 IL1B TNFRSF11B LILRB2 CAMK4 STAT1 PPP3CC JUND IFNG LCK
path:hsa05130	Pathogenic Escherichia coli infection	14	51	0.27	0.0230983	0.102952	TLR5 TLR4 YWHAQ CD14 ABL1 ARPC1B FYN TUBA1C ITGB1 EZR TUBA1B TUBB6 TUBA1A LY96
path:hsa00051	Fructose and mannose metabolism	9	30	0.3	0.0253653	0.109916	HK3 HK1 FBP1 TSTA3 FUK ALDOA TPI1 GMDS FPGT
path:hsa00500	Starch and sucrose metabolism	9	30	0.3	0.0253653	0.109916	HK3 GBA3 HK1 GYG1 PYGL GPI GBE1 AGL PGM1
path:hsa00130	Ubiquinone and other terpenoid-quinone biosynthesis	4	11	0.36	0.0287019	0.122671	NQO1 COQ5 VKORC1 COQ3
path:hsa00785	Lipoic acid metabolism	1	2	0.5	0.0300545	0.125008	LIAS
path:hsa00980	Metabolism of xenobiotics by cytochrome P450	15	57	0.26	0.02972	0.125008	HPGDS HSD11B1 UGT2B17 GSTK1 MGST1 CYP1B1 ALDH1A3 GSTM3 ADH5 MGST3 GSTO1 CBR1 CBR3 EPHX1 GSTM2
path:hsa01200	Carbon metabolism	26	109	0.24	0.0308513	0.125008	ACO1 MDH1 HK3 PGAM1 ME1 HK1 TALDO1 SDHD GOT2 FBP1 MDH2 DLD PGD ADH5 GAPDH ACSS2 GPI EHHADH ALDOA TPI1 PGAM2 ENO1 G6PD GLDC ACADM ENO2
path:hsa05168	Herpes simplex infection	39	173	0.23	0.0307698	0.125008	TAF13 POLR2A MYD88 IFNGR2 PPP1CC TAF6 MAPK10 IL12B CYCS HLA-G EEF1D C3 CHUK TNFRSF1A NFKBIA FASLG CDC34 TLR2 CD74 HLA-C SRSF5 CFP GTF2I CCL5 CCL2 TAF3 LTA JAK2 HLA-DOB SRSF4 IL1B TP53 STAT1 IL15 CDK1 IFNG FAS IFIT1 IL6
path:hsa04974	Protein digestion and absorption	21	86	0.24	0.0344851	0.13794	COL11A1 COL5A2 COL5A3 COL3A1 KCNE3 DPP4 COL1A2 COL4A1 COL6A3 COL15A1 COL4A2 SLC3A2 COL5A1 COL12A1 SLC7A7 COL1A1 COL6A2 ATP1B1 SLC1A1 SLC38A2 CPA3
path:hsa00740	Riboflavin metabolism	3	8	0.38	0.0350087	0.138262	ACP2 BLVRB ACP5
path:hsa00400	Phenylalanine, tyrosine and tryptophan biosynthesis	2	5	0.4	0.0394844	0.146092	GOT2 IL4I1
path:hsa00524	Neomycin, kanamycin and gentamicin biosynthesis	2	5	0.4	0.0394844	0.146092	HK3 HK1
path:hsa00750	Vitamin B6 metabolism	2	5	0.4	0.0394844	0.146092	AOX1 PNPO
path:hsa04120	Ubiquitin mediated proteolysis	30	131	0.23	0.0394418	0.146092	DDB1 UBE2NL UBE2E1 UBE2S STUB1 UBE2D4 RBX1 UBA2 CDC23 UBE4B UBE2D1 MGRN1 CDC34 UBE2M FBXW11 TRIM32 PRPF19 NEDD4 MDM2 ANAPC7 CUL4B WWP1 UBE2E3 UBE2Q2 KEAP1 BRCA1 RHOBTB1 MAP3K1 UBE2C CDC20
path:hsa04630	Jak-STAT signaling pathway	35	156	0.22	0.0398007	0.146092	CSF3R IFNGR2 PDGFRA SOCS2 IL12B LIF IL10 AOX1 AKT2 CISH STAT4 IL7R IL22RA2 SOCS7 MCL1 OSMR PIK3R3 STAM SOCS5 IL13RA1 IL2RB IL10RA PDGFRB JAK2 FHL1 CSF2RA IL10RB STAT1 IL15 CCND1 LIFR IFNG CCND2 IL7 IL6
path:hsa04672	Intestinal immune network for IgA production	12	45	0.27	0.0380104	0.146092	TNFSF13B IL10 CXCL12 ICOS CD28 CCR10 HLA-DOB CD86 IL15 CD80 AICDA IL6
path:hsa05416	Viral myocarditis	14	55	0.25	0.0438946	0.159246	CYCS PRF1 HLA-G ABL1 EIF4G3 HLA-C FYN CAV1 CD28 HLA-DOB BID CD86 CCND1 CD80
path:hsa04510	Focal adhesion	42	193	0.22	0.0451894	0.162059	ITGB5 PPP1CC FN1 COL1A2 MAPK10 PDGFRA COL4A1 COMP COL6A3 SPP1 VASP AKT2 TNC PARVA THBS2 VWF COL4A2 CAPN2 PDGFC PIK3R3 LAMB1 TLN1 ACTN1 PAK3 ITGAV FYN CAV1 COL1A1 PAK1 FLNA COL6A2 VEGFC IGF1 CAV2 THBS1 ITGB1 PDGFRB KDR LAMC1 LAMB2 CCND1 CCND2
path:hsa05204	Chemical carcinogenesis	15	60	0.25	0.0462287	0.163902	HPGDS HSD11B1 UGT2B17 GSTK1 MGST1 CYP1B1 ALDH1A3 GSTM3 ADH5 NAT1 MGST3 GSTO1 CBR1 EPHX1 GSTM2
path:hsa05200	Pathways in cancer	104	520	0.2	0.0476633	0.167089	MMP1 WNT2 CTNNA2 MLH1 CSF3R NQO1 IFNGR2 MITF CEBPA NCOA4 FN1 PLD1 F2R HIF1A MAPK10 PDGFRA COL4A1 IL12B FZD4 GNB2 RBX1 AKT2 MGST1 CYCS CSF1R SP1 LPAR1 STAT4 CHUK MMP2 GSTM3 LRP6 GNAQ NFKBIA FASLG IL7R PTGER2 MAX RXRB COL4A2 ABL1 MMP9 CXCL12 PIK3R3 TCF7L2 HMOX1 FZD7 LAMB1 EDNRA GNG12 JAG1 ITGAV MDM2 PTGER4 VEGFC GNG10 CDKN1B IGF1 IL13RA1 IL2RB EPAS1 ETS1 RALGDS MGST3 NCOA3 TPR ITGB1 PDGFRB DAPK1 JA…
path:hsa00330	Arginine and proline metabolism	11	42	0.26	0.0488392	0.169309	PRODH ARG2 CKB GOT2 OAT LAP3 ALDH9A1 ALDH18A1 CNDP1 SAT1 CKM
path:hsa00620	Pyruvate metabolism	10	38	0.26	0.0531165	0.182114	MDH1 ME1 GLO1 MDH2 DLD ACACA ACSS2 ALDH9A1 LDHA LDHB
path:hsa03440	Homologous recombination	9	34	0.26	0.0576734	0.195588	POLD1 PALB2 RPA1 RPA4 RPA3 ATM RPA2 BRCA1 BRIP1
path:hsa00061	Fatty acid biosynthesis	4	13	0.31	0.0592191	0.198335	ACSL3 ACACA MCAT ACSL1
path:hsa00280	Valine, leucine and isoleucine degradation	12	48	0.25	0.0610261	0.198335	HSD17B10 BCKDHA AOX1 DLD HADHB EHHADH ALDH9A1 IL4I1 AUH HADH BCAT1 ACADM
path:hsa05230	Central carbon metabolism in cancer	15	62	0.24	0.06031	0.198335	HK3 PGAM1 HK1 HIF1A PDGFRA AKT2 SCO2 PIK3R3 PGAM2 G6PD PDGFRB LDHA TP53 SLC7A5 KIT
path:hsa05320	Autoimmune thyroid disease	12	48	0.25	0.0610261	0.198335	IL10 PRF1 HLA-G GZMB FASLG HLA-C CD28 CTLA4 HLA-DOB CD86 CD80 FAS
path:hsa04920	Adipocytokine signaling pathway	16	68	0.24	0.069927	0.22492	MAPK10 ACSL3 AKT2 CHUK TNFRSF1A NFKBIA PRKCQ ADIPOR2 RXRB JAK2 CD36 TNFRSF1B ACSL1 IRS2 NFKBIE ADIPOQ
path:hsa03013	RNA transport	31	143	0.22	0.0716981	0.225958	CYFIP1 SUMO4 EIF3D RPP40 NUP35 POP4 EIF4A1 POM121 GEMIN4 XPOT CLNS1A NUP205 POP1 EIF4A3 RAN FMR1 NUP37 EIF4G3 EIF5B EIF1AX POP7 GEMIN5 EIF2B2 EIF4EBP1 TPR DDX20 NUP88 NXT1 ACIN1 RGPD1 EIF1AY
path:hsa04217	Necroptosis	32	148	0.22	0.0711475	0.225958	FTL IFNGR2 MAPK10 PARP4 PYGL STAT4 GLUL TNFRSF1A FASLG TLR4 CAPN2 TNFAIP3 HIST2H2AA3 HIST3H2A PLA2G4A CYBB PLA2G4C IL33 JAK2 FTH1 BID CASP1 IL1B HIST1H2AC PYCARD HIST1H2AJ STAT1 HIST1H2AE MLKL TNFSF10 IFNG FAS
path:hsa05219	Bladder cancer	10	40	0.25	0.0736311	0.229729	MMP1 MMP2 MMP9 MDM2 THBS1 DAPK1 TYMP CDK4 TP53 CCND1
path:hsa04623	Cytosolic DNA-sensing pathway	14	59	0.24	0.0753281	0.232697	CXCL10 CHUK TMEM173 NFKBIA CCL4 IL18 TREX1 POLR2E CCL5 IL33 CASP1 IL1B PYCARD IL6
path:hsa00514	Other types of O-glycan biosynthesis	5	18	0.28	0.0765193	0.234059	GXYLT2 B4GALT1 POGLUT1 ST6GAL1 GXYLT1
path:hsa00603	Glycosphingolipid biosynthesis - globo and isoglobo series	4	14	0.29	0.0793953	0.238186	HEXB NAGA ST8SIA1 GBGT1
path:hsa04210	Apoptosis	29	134	0.22	0.0787166	0.238186	CTSK MAPK10 AKT2 CTSC PARP4 CYCS PRF1 GZMB CTSB CHUK CASP2 TNFRSF1A NFKBIA FASLG CAPN2 MCL1 PIK3R3 ATM TUBA1C CTSO CTSD MAP3K5 BID TUBA1B BCL2A1 TP53 TNFSF10 TUBA1A FAS
path:hsa00640	Propanoate metabolism	8	32	0.25	0.0889948	0.264442	BCKDHA DLD ACACA ACSS2 EHHADH LDHA LDHB ACADM
path:hsa04390	Hippo signaling pathway	31	146	0.21	0.0898789	0.264549	WNT2 CTNNA2 LATS1 PPP1CC FZD4 SNAI2 WWTR1 FRMD6 YWHAQ YAP1 YWHAG TP53BP2 SERPINE1 FBXW11 TCF7L2 FZD7 ID2 SMAD1 TEAD1 BMP2 WNT5A AXIN1 ID1 YWHAE LATS2 FZD6 FZD2 CCND1 CTGF CCND2 SMAD7
path:hsa00531	Glycosaminoglycan degradation	5	19	0.26	0.0960919	0.277599	HYAL2 HPSE HEXB GLB1 GNS
path:hsa05206	MicroRNAs in cancer	32	152	0.21	0.0954031	0.277599	PLAU PDGFRA TIMP3 TNC CYP1B1 VIM ZEB2 DNMT1 ABL1 MMP9 MCL1 HMOX1 MIR21 ATM MDM2 MDM4 CDKN1B CCNG1 THBS1 PDGFRB SIRT1 EZR ZFPM2 KIF23 CD44 BRCA1 IRS2 TP53 CDCA5 SPRY2 CCND1 CCND2
path:hsa00030	Pentose phosphate pathway	7	28	0.25	0.0978623	0.278061	TALDO1 FBP1 PGD GPI ALDOA G6PD PGM1
path:hsa00564	Glycerophospholipid metabolism	18	81	0.22	0.0980345	0.278061	MBOAT7 LPCAT2 PLD1 LYPLA2 PLA2G2D AGPAT1 PLA2G4A LCLAT1 LYPLA1 PLA2G2A PLD3 PLA2G4C LPIN1 PLA2G16 GPD1L AGPAT5 MBOAT2 MBOAT1
path:hsa04151	PI3K-Akt signaling pathway	68	344	0.2	0.102697	0.288662	CSF3R ITGB5 FN1 COL1A2 F2R PHLPP2 TEK PDGFRA COL4A1 COMP COL6A3 SPP1 GNB2 AKT2 TNC EFNA1 CSF1R LPAR1 CHUK THBS2 ATF6B FASLG MTCP1 IL7R VWF TLR4 COL4A2 YWHAQ YWHAG SGK3 PDGFC MCL1 OSMR PIK3R3 LAMB1 GNG12 TLR2 ITGAV COL1A1 MDM2 COL6A2 VEGFC GNG10 CDKN1B IGF1 IL2RB THBS1 EIF4EBP1 ITGB1 PDGFRB JAK2 KDR GNG5 CDK4 LAMC1 PIK3CG YWHAE BRCA1 LAMB2 LPAR6 TP53 CCND1 CCND2 FGF13 KIT GNG11 IL7 IL6
path:hsa01212	Fatty acid metabolism	10	43	0.23	0.112694	0.313933	ACSL3 PPT1 HADHB MECR ACACA EHHADH MCAT HADH ACSL1 ACADM
path:hsa00600	Sphingolipid metabolism	8	34	0.24	0.121237	0.334743	SPHK1 ACER3 ASAH1 SGMS1 CERK NEU1 DEGS2 GLB1
path:hsa05110	Vibrio cholerae infection	11	49	0.22	0.129717	0.355015	SEC61B ATP6V0B ATP6AP1 ATP6V1B2 SEC61A2 ATP6V1F ATP6V1G1 TJP2 KDELR3 ATP6V0E1 ADCY3
path:hsa00230	Purine metabolism	32	157	0.2	0.132691	0.359996	POLR2A IMPDH1 POLD1 AK4 ITPA ALLC IMPDH2 PDE6G NME3 POLR1B GUCY1B3 ADSL POLA2 PDE7A PAPSS2 AK3 POLE3 GUCY1A3 ATIC POLR2E PFAS PDE3B PNPT1 PNP NME1 ENPP4 ADCY3 PGM1 NUDT5 ADA ENTPD6 RRM2
path:hsa03450	Non-homologous end-joining	3	12	0.25	0.13983	0.376094	XRCC5 NHEJ1 POLM
path:hsa00290	Valine, leucine and isoleucine biosynthesis	1	4	0.25	0.141369	0.376153	BCAT1
path:hsa00592	alpha-Linolenic acid metabolism	5	21	0.24	0.142263	0.376153	PLA2G2D PLA2G4A PLA2G2A PLA2G4C PLA2G16
path:hsa04924	Renin secretion	14	65	0.22	0.14495	0.380037	ORAI1 KCNJ2 CTSB GNAQ GUCY1B3 PTGER2 EDNRA GUCY1A3 PTGER4 PDE3B GNAI1 AQP1 CLCA4 PPP3CC
path:hsa04650	Natural killer cell mediated cytotoxicity	25	122	0.2	0.148621	0.386415	IFNGR2 FCER1G PRF1 HLA-G GZMB FASLG KIR2DL2 TYROBP PIK3R3 HLA-C FYN HCST LCP2 PAK1 CD247 FCGR3B BID PTK2B SH2D1A ZAP70 PPP3CC TNFSF10 IFNG FAS LCK
path:hsa00630	Glyoxylate and dicarboxylate metabolism	6	26	0.23	0.150532	0.388149	ACO1 MDH1 MDH2 DLD GLUL GLDC
path:hsa00071	Fatty acid degradation	9	41	0.22	0.160724	0.397234	ACSL3 HADHB ADH5 EHHADH ALDH9A1 GCDH HADH ACSL1 ACADM
path:hsa00120	Primary bile acid biosynthesis	4	17	0.24	0.158101	0.397234	CYP27A1 HSD3B7 SCP2 CH25H
path:hsa00240	Pyrimidine metabolism	19	92	0.21	0.162968	0.397234	POLR2A POLD1 NME3 POLR1B DCTD POLA2 POLE3 DCTPP1 UCK2 POLR2E DPYD PNPT1 PNP TYMP NME1 ENTPD6 DUT TK1 RRM2
path:hsa00360	Phenylalanine metabolism	4	17	0.24	0.158101	0.397234	MIF GOT2 ALDH1A3 IL4I1
path:hsa00561	Glycerolipid metabolism	11	51	0.22	0.16162	0.397234	LIPG AGPAT1 MGLL LCLAT1 ALDH9A1 LPIN1 DGAT2 AGPAT5 MBOAT2 MBOAT1 LPL
path:hsa04137	Mitophagy - animal	13	61	0.21	0.160324	0.397234	RAB7A MITF HIF1A MAPK10 SP1 MRAS RHOT1 OPTN FUNDC1 FIS1 BNIP3 RRAS TP53
path:hsa05222	Small cell lung cancer	19	92	0.21	0.162968	0.397234	FN1 COL4A1 AKT2 CYCS CHUK NFKBIA MAX RXRB COL4A2 PIK3R3 LAMB1 ITGAV CDKN1B ITGB1 CDK4 LAMC1 LAMB2 TP53 CCND1
path:hsa04068	FoxO signaling pathway	26	129	0.2	0.166636	0.403027	MAPK10 IL10 AKT2 CHUK FASLG IL7R FBXO25 SGK3 PIK3R3 ATM MDM2 CDKN1B HOMER1 IGF1 PLK2 FBXO32 BNIP3 SIRT1 SOD2 IRS2 CCND1 CCNB1 TNFSF10 CCND2 S1PR1 IL6
path:hsa03060	Protein export	5	22	0.23	0.168533	0.404479	SRP68 SEC61B IMMP2L SRP9 SEC61A2
path:hsa04966	Collecting duct acid secretion	6	27	0.22	0.174593	0.415825	SLC12A7 ATP6V1B2 ATP6V1F ATP6V1G1 ATP6V0E1 CA2
path:hsa00260	Glycine, serine and threonine metabolism	8	37	0.22	0.179653	0.419454	PGAM1 ALAS1 DLD BHMT GCAT PGAM2 GLDC CTH
path:hsa00510	N-Glycan biosynthesis	10	47	0.21	0.179829	0.419454	MGAT4B MAN1C1 DOLPP1 B4GALT1 RPN2 ALG6 MOGS ST6GAL1 DOLK GANAB
path:hsa03022	Basal transcription factors	9	42	0.21	0.18015	0.419454	TAF13 TAF6 TAF7 GTF2A2 GTF2I TAF15 TAF3 MNAT1 GTF2H2
path:hsa04931	Insulin resistance	21	105	0.2	0.194885	0.450401	PPP1CC MAPK10 SLC27A2 RPS6KA3 NR1H3 AKT2 MLXIP NR1H2 PYGL GFPT2 TNFRSF1A NFKBIA PRKCQ SLC27A1 PIK3R3 MGEA5 RPS6KA1 CD36 IRS2 TBC1D4 IL6
path:hsa04330	Notch signaling pathway	10	48	0.21	0.199046	0.456635	PSEN1 PSENEN KAT2A MAML1 CIR1 DTX3L JAG1 MAML2 DTX4 CTBP2
path:hsa00310	Lysine degradation	9	43	0.21	0.200591	0.45682	PLOD2 PLOD1 PRDM2 BBOX1 EHHADH ALDH9A1 GCDH HADH EHMT1
path:hsa04612	Antigen processing and presentation	14	69	0.2	0.205926	0.465572	HLA-G CTSB CD8B CD8A KIR2DL2 CD74 HLA-C CD4 LGMN RFXANK HLA-DOB CIITA IFNG HSPA1A
path:hsa00232	Caffeine metabolism	1	5	0.2	0.209293	0.46978	NAT1
path:hsa04114	Oocyte meiosis	22	112	0.2	0.216928	0.48344	PPP1CC SMC1A RPS6KA3 RBX1 SLK CDC23 SPDYE1 YWHAQ YWHAG PTTG2 FBXW11 IGF1 ANAPC7 RPS6KA1 ESPL1 ADCY3 YWHAE MAD2L1 PPP3CC CCNB1 CDK1 CDC20
path:hsa01523	Antifolate resistance	6	29	0.21	0.227083	0.501918	ABCG2 CHUK ATIC GGH IL1B IL6
path:hsa04141	Protein processing in endoplasmic reticulum	30	156	0.19	0.228437	0.501918	MAPK10 FBXO6 SEC61B HSPBP1 STUB1 UBE2D4 RBX1 NPLOC4 ATF6B MAN1C1 UBE4B UBE2D1 VCP CAPN2 DNAJA2 RPN2 DNAJB1 SEC61A2 CRYAB MARCH6 MOGS SEC31A MAP3K5 DNAJC5B GANAB EDEM1 HYOU1 SSR4 P4HB HSPA1A
path:hsa04611	Platelet activation	23	119	0.19	0.238806	0.521031	COL3A1 PPP1CC COL1A2 F2R ORAI1 FCER1G VASP AKT2 GNAQ GUCY1B3 VWF PIK3R3 TLN1 PLA2G4A GUCY1A3 FYN COL1A1 LCP2 PLA2G4C ITGB1 GNAI1 ADCY3 PIK3CG
path:hsa00052	Galactose metabolism	6	30	0.2	0.255137	0.522209	HK3 HK1 B4GALT1 GALM PGM1 GLB1
path:hsa00220	Arginine biosynthesis	4	20	0.2	0.257757	0.522209	ARG2 GOT2 GLUL ASS1
path:hsa00450	Selenocompound metabolism	3	15	0.2	0.254674	0.522209	PAPSS2 MTR CTH
path:hsa00563	Glycosylphosphatidylinositol (GPI) - anchor biosynthesis	5	25	0.2	0.257338	0.522209	PIGA PIGP PIGU PIGY PIGK
path:hsa00591	Linoleic acid metabolism	5	25	0.2	0.257338	0.522209	PLA2G2D PLA2G4A PLA2G2A PLA2G4C PLA2G16
path:hsa00604	Glycosphingolipid biosynthesis - ganglio series	3	15	0.2	0.254674	0.522209	HEXB ST8SIA1 GLB1
path:hsa00790	Folate biosynthesis	5	25	0.2	0.257338	0.522209	SPR GGH AKR1C3 CBR1 GCH1
path:hsa04010	MAPK signaling pathway	53	285	0.19	0.256422	0.522209	PTPRR MYD88 CACNG6 MAPK10 TEK PDGFRA RPS6KA3 IL1R1 AKT2 EFNA1 CSF1R MRAS MKNK1 CHUK MAP3K4 TNFRSF1A RELB FASLG ARRB1 MAX CD14 PDGFC GNG12 PLA2G4A CACNA2D1 DUSP3 DUSP2 MKNK2 PAK1 FLNA VEGFC IGF1 DUSP6 MAPKAPK3 PLA2G4C RPS6KA1 HSPB1 PDGFRB DUSP5 KDR MAP3K5 RASA1 IL1B RRAS TP53 PPP3CC MAP3K1 CACNA2D3 JUND FAS FGF13 KIT HSPA1A
path:hsa04932	Non-alcoholic fatty liver disease (NAFLD)	27	141	0.19	0.243619	0.522209	UQCRC1 CEBPA MAPK10 SDHD NR1H3 AKT2 UQCRFS1 UQCR10 CYCS CYC1 NDUFA11 MLXIP TNFRSF1A FASLG ADIPOR2 PIK3R3 COX8A COX8C NDUFB6 NDUFAB1 MAP3K5 BID IL1B IRS2 FAS ADIPOQ IL6
path:hsa05164	Influenza A	31	163	0.19	0.24656	0.522209	MYD88 IFNGR2 MAPK10 IL12B CXCL10 AKT2 CYCS TNFRSF1A NFKBIA FASLG TLR4 PIK3R3 KPNA2 IL18 DNAJB1 CCL5 CCL2 IL33 JAK2 NXT1 HLA-DOB CIITA CASP1 IL1B PYCARD STAT1 TNFSF10 IFNG FAS IL6 HSPA1A
path:hsa05221	Acute myeloid leukemia	13	66	0.2	0.245309	0.522209	CEBPA AKT2 CSF1R CHUK CD14 PIK3R3 TCF7L2 DUSP6 EIF4EBP1 BCL2A1 CCND1 ITGAM KIT
path:hsa05120	Epithelial cell signaling in Helicobacter pylori infection	13	67	0.19	0.264121	0.53165	PTPRZ1 MAPK10 ATP6V0B CHUK NFKBIA ATP6AP1 ATP6V1B2 PAK1 ATP6V1F CXCL1 CCL5 ATP6V1G1 ATP6V0E1
path:hsa04260	Cardiac muscle contraction	14	73	0.19	0.276506	0.553012	RYR2 UQCRC1 CACNG6 UQCRFS1 UQCR10 CYC1 TPM4 ACTC1 COX8A COX8C SLC9A6 CACNA2D1 ATP1B1 CACNA2D3
path:hsa04975	Fat digestion and absorption	7	36	0.19	0.278539	0.55353	PLA2G2D GOT2 AGPAT1 PLA2G2A CD36 DGAT2 ABCA1
path:hsa00410	beta-Alanine metabolism	6	31	0.19	0.284128	0.557534	ALDH1A3 EHHADH ALDH9A1 DPYD CNDP1 ACADM
path:hsa03008	Ribosome biogenesis in eukaryotes	13	68	0.19	0.283418	0.557534	RPP40 REXO1 NOB1 POP4 POP1 RAN NOP58 EMG1 UTP14C RIOK1 POP7 NOP10 NXT1
path:hsa04310	Wnt signaling pathway	26	139	0.19	0.288866	0.563289	WNT2 PSEN1 MMP7 MAPK10 FZD4 RBX1 LRP6 CTNNBIP1 SFRP4 FBXW11 TCF7L2 FZD7 PRICKLE2 SFRP2 WNT5A AXIN1 DAAM1 SERPINF1 RUVBL1 CTBP2 TP53 FZD6 FZD2 PPP3CC CCND1 CCND2
path:hsa00100	Steroid biosynthesis	3	16	0.19	0.29654	0.571114	CYP27B1 LIPA DHCR24
path:hsa00430	Taurine and hypotaurine metabolism	2	11	0.18	0.294852	0.571114	ADO CDO1
path:hsa05161	Hepatitis B	26	140	0.19	0.302631	0.579269	DDB1 MYD88 MAPK10 AKT2 CYCS STAT4 CHUK ATF6B NFKBIA FASLG TLR4 ATP6AP1 YWHAQ MMP9 PIK3R3 TLR2 PCNA CDKN1B PTK2B CDK4 TP53 STAT1 CCND1 MAP3K1 FAS IL6
path:hsa04218	Cellular senescence	29	157	0.18	0.308624	0.58358	PPP1CC AKT2 HIPK3 HLA-G HUS1 MRAS CAPN2 SERPINE1 KIR2DL2 FBXW11 PIK3R3 HLA-C ATM MDM2 ETS1 EIF4EBP1 SIRT1 IGFBP3 CDK4 RRAS MYBL2 TP53 PPP3CC CCND1 CCNB1 CDK1 CCND2 CHEK1 IL6
path:hsa05231	Choline metabolism in cancer	17	91	0.19	0.308234	0.58358	PLD1 HIF1A MAPK10 PDGFRA AKT2 SP1 PDGFC PIK3R3 PLA2G4A PIP5K1A WASF3 LYPLA1 SLC44A2 PLA2G4C RALGDS EIF4EBP1 PDGFRB
path:hsa05215	Prostate cancer	18	97	0.19	0.317378	0.596518	MMP3 PLAU PDGFRA AKT2 IL1R2 PLAT CHUK NFKBIA MMP9 PDGFC PIK3R3 TCF7L2 MDM2 CDKN1B IGF1 PDGFRB TP53 CCND1
path:hsa00340	Histidine metabolism	4	22	0.18	0.330706	0.600785	ALDH1A3 HNMT ALDH9A1 CNDP1
path:hsa00511	Other glycan degradation	3	17	0.18	0.339137	0.600785	HEXB NEU1 GLB1
path:hsa00515	Mannose type O-glycan biosynthesis	3	17	0.18	0.339137	0.600785	B4GALT1 FKTN FUT4
path:hsa00760	Nicotinate and nicotinamide metabolism	4	22	0.18	0.330706	0.600785	AOX1 NNMT NAMPT PNP
path:hsa00910	Nitrogen metabolism	3	17	0.18	0.339137	0.600785	CA12 GLUL CA2
path:hsa00970	Aminoacyl-tRNA biosynthesis	8	43	0.19	0.323929	0.600785	NARS KARS FARSB RARS VARS2 TARS NARS2 WARS
path:hsa01210	2-Oxocarboxylic acid metabolism	3	17	0.18	0.339137	0.600785	ACO1 GOT2 BCAT1
path:hsa03040	Spliceosome	22	121	0.18	0.348805	0.600785	SNRPB DDX23 HNRNPU DDX46 TXNL4A CDC5L U2AF2 SF3B5 DHX15 EIF4A3 PRPF8 CRNKL1 PHF5A PRPF19 TCERG1 SRSF5 SF3B4 PLRG1 SRSF4 ACIN1 PPIL1 HSPA1A
path:hsa04071	Sphingolipid signaling pathway	20	110	0.18	0.350458	0.600785	SPHK1 ADORA3 PLD1 FCER1G MAPK10 AKT2 TNFRSF1A GNAQ PIK3R3 ASAH1 FYN S1PR3 SGMS1 CTSD MAP3K5 GNAI1 DEGS2 BID TP53 S1PR1
path:hsa04072	Phospholipase D signaling pathway	25	136	0.18	0.324179	0.600785	SPHK1 PLD1 F2R FCER1G PDGFRA AKT2 MRAS LPAR1 AGPAT1 PDGFC PIK3R3 PLA2G4A FYN PIP5K1A CYTH1 PLA2G4C RALGDS PDGFRB ADCY3 PTK2B AGPAT5 PIK3CG LPAR6 RRAS KIT
path:hsa04122	Sulfur relay system	1	7	0.14	0.349109	0.600785	TST
path:hsa04130	SNARE interactions in vesicular transport	6	33	0.18	0.344087	0.600785	STX10 VAMP7 VTI1B BNIP1 VAMP2 STX16
path:hsa04211	Longevity regulating pathway	16	87	0.18	0.334607	0.600785	AKT2 ATF6B ADIPOR2 PIK3R3 IGF1 EIF4EBP1 ADCY3 SESN1 SIRT1 SOD2 EHMT1 IRS2 TP53 CAMK4 APPL1 ADIPOQ
path:hsa04614	Renin-angiotensin system	4	22	0.18	0.330706	0.600785	CTSA THOP1 NLN CPA3
path:hsa05167	Kaposis sarcoma-associated herpesvirus infection	33	182	0.18	0.344433	0.600785	HIF1A MAPK10 HCK GNB2 AKT2 CCR5 CYCS HLA-G C3 CHUK TNFRSF1A NFKBIA PIK3R3 GNG12 HLA-C PREX1 GNG10 CXCL1 JAK2 CCR1 GNG5 BID CDK4 PIK3CG TP53 CXCL2 CD86 STAT1 PPP3CC CCND1 FAS GNG11 IL6
path:hsa05203	Viral carcinogenesis	34	188	0.18	0.349593	0.600785	DDB1 HDAC3 CCR5 HLA-G C3 ATF6B NFKBIA HIST1H4E GTF2A2 YWHAQ YWHAG KAT2A PIK3R3 DNAJA3 ACTN1 HLA-C MDM2 POLB HIST1H4C CDKN1B HIST1H4H HIST1H4B CDK4 GTF2H2 YWHAE HIST1H2BK TP53 HIST1H2BI CCND1 HIST1H2BF CDK1 CCND2 CDC20 CHEK1
path:hsa04370	VEGF signaling pathway	10	55	0.18	0.352893	0.601654	SPHK1 AKT2 SH2D2A PIK3R3 PLA2G4A MAPKAPK3 PLA2G4C HSPB1 KDR PPP3CC
path:hsa03010	Ribosome	23	127	0.18	0.355631	0.603026	RPLP0 RPLP1 RPS2 RPLP2 MRPL3 MRPL34 RPL7A RPL29 MRPL32 MRPS18C MRPL17 MRPL27 MRPS15 RPL11 MRPL15 RPS11 RPL36 RPS27 MRPL11 RPL38 RPS24 MRPL13 RPS4Y1
path:hsa04964	Proximal tubule bicarbonate reclamation	4	23	0.17	0.367946	0.620536	MDH1 ATP1B1 CA2 AQP1
path:hsa00670	One carbon pool by folate	3	18	0.17	0.381896	0.621533	MTHFD1 MTR ATIC
path:hsa00770	Pantothenate and CoA biosynthesis	3	18	0.17	0.381896	0.621533	VNN1 DPYD BCAT1
path:hsa04371	Apelin signaling pathway	24	134	0.18	0.377368	0.621533	RYR2 SPHK1 SPP1 GNB2 AKT2 MRAS PLAT GNAQ APLNR SERPINE1 GNG12 JAG1 GNG10 PDE3B GNAI1 ADCY3 GNG5 PIK3CG RRAS CAMK4 CCND1 CTGF GNG11 EGR1
path:hsa04540	Gap junction	15	84	0.18	0.382482	0.621533	PDGFRA GJA1 LPAR1 GNAQ GUCY1B3 PDGFC GUCY1A3 TUBA1C PDGFRB GNAI1 ADCY3 TUBA1B TUBB6 CDK1 TUBA1A
path:hsa04670	Leukocyte transendothelial migration	19	106	0.18	0.376878	0.621533	CTNNA2 VASP THY1 MMP2 MMP9 ITK CXCL12 PIK3R3 ACTN1 CYBB VCAM1 CLDN20 ITGB1 GNAI1 EZR PTK2B SIPA1 NCF2 ITGAM
path:hsa05010	Alzheimers disease	29	162	0.18	0.376563	0.621533	UQCRC1 PSEN1 PSENEN HSD17B10 SDHD UQCRFS1 UQCR10 CYCS CYC1 NDUFA11 ATP5B TNFRSF1A NAE1 GNAQ CAPN2 GAPDH COX8A COX8C NDUFB6 NDUFAB1 ATP2A3 APP APOE BID IL1B PPP3CC BACE2 LPL FAS
path:hsa05169	Epstein-Barr virus infection	34	190	0.18	0.375045	0.621533	POLR2A MAPK10 IL10 PSMD3 AKT2 HLA-G VIM PSMC2 CHUK ADRM1 NFKBIA RELB YWHAQ YWHAG RAN TNFAIP3 PIK3R3 HLA-C NEDD4 MDM2 CDKN1B POLR2E IL10RA HSPB1 PSMD14 CD44 YWHAE TP53 NFKBIE IL10RB FGR CDK1 IFNG HSPA1A
path:hsa05014	Amyotrophic lateral sclerosis (ALS)	9	51	0.18	0.389339	0.626153	GPX1 CYCS TNFRSF1A MAP3K5 BID TNFRSF1B CASP1 TP53 PPP3CC
path:hsa05131	Shigellosis	11	62	0.18	0.387475	0.626153	MAPK10 RIPK2 CHUK NFKBIA ABL1 ARPC1B RHOG FBXW11 ITGB1 NOD2 CD44
path:hsa00250	Alanine, aspartate and glutamate metabolism	6	35	0.17	0.40531	0.639852	GOT2 GLUL GFPT2 ADSL IL4I1 ASS1
path:hsa00350	Tyrosine metabolism	6	35	0.17	0.40531	0.639852	MIF AOX1 GOT2 ALDH1A3 ADH5 IL4I1
path:hsa00534	Glycosaminoglycan biosynthesis - heparan sulfate / heparin	4	24	0.17	0.405213	0.639852	HS3ST2 HS3ST3A1 EXTL2 EXT2
path:hsa03018	RNA degradation	13	74	0.18	0.40606	0.639852	C1D DCP1B EXOSC3 PATL1 EDC4 CNOT3 DDX6 WDR61 EXOSC5 ENO1 CNOT10 PNPT1 ENO2
path:hsa04621	NOD-like receptor signaling pathway	28	159	0.18	0.413875	0.648889	MYD88 MAPK10 RIPK2 CTSB CHUK TMEM173 NFKBIA TLR4 GBP3 TNFAIP3 IL18 CYBB GBP1 CXCL1 CCL5 CCL2 CARD6 NAMPT TXN NOD2 GBP2 CASP1 IL1B PYCARD CXCL2 STAT1 GBP5 IL6
path:hsa04917	Prolactin signaling pathway	12	69	0.17	0.419073	0.653754	MAPK10 SOCS2 AKT2 CISH SOCS7 PIK3R3 SOCS5 JAK2 IRF1 STAT1 CCND1 CCND2
path:hsa00020	Citrate cycle (TCA cycle)	5	30	0.17	0.422389	0.655649	ACO1 MDH1 SDHD MDH2 DLD
path:hsa04144	Endocytosis	40	228	0.18	0.425237	0.656802	SH3GL2 RAB7A DAB2 VPS25 PLD1 ARF5 VPS26A TSG101 PDGFRA AP2A2 DNAJC6 EHD2 CCR5 PDCD6IP HLA-G ARFGAP2 SNX6 ARRB1 AP2S1 ARPC1B ACAP2 STAM HLA-C NEDD4 CAV1 PIP5K1A MDM2 VPS28 HGS CYTH1 IL2RB CAV2 SMAP1 ASAP2 WWP1 RAB11FIP2 SNX3 PSD4 RAB31 HSPA1A
path:hsa04724	Glutamatergic synapse	19	109	0.17	0.428928	0.659239	SLC1A3 PLD1 GNB2 GLUL GNAQ GNG12 PLA2G4A GNG10 HOMER1 PLA2G4C GNAI1 SLC1A1 ADCY3 GNG5 SHANK3 SLC38A2 TRPC1 PPP3CC GNG11
path:hsa00053	Ascorbate and aldarate metabolism	2	14	0.14	0.447867	0.6718	UGT2B17 ALDH9A1
path:hsa00533	Glycosaminoglycan biosynthesis - keratan sulfate	2	14	0.14	0.447867	0.6718	B4GALT1 CHST2
path:hsa01522	Endocrine resistance	16	93	0.17	0.447371	0.6718	MAPK10 AKT2 SP1 MMP2 MMP9 PIK3R3 JAG1 MDM2 CDKN1B IGF1 NCOA3 ADCY3 CDK4 TP53 CCND1 BIK
path:hsa04014	Ras signaling pathway	39	224	0.17	0.445897	0.6718	RGL1 PLD1 MAPK10 TEK PDGFRA PLA2G2D GNB2 AKT2 EFNA1 CSF1R MRAS CHUK FASLG ABL1 PDGFC PIK3R3 GNG12 PLA2G4A PAK3 PAK1 VEGFC GNG10 TIAM1 IGF1 PLA2G2A PLA2G4C ETS1 RALGDS PDGFRB KDR RASA1 PLA2G16 PLA1A GNG5 RRAS ZAP70 FGF13 KIT GNG11
path:hsa04662	B cell receptor signaling pathway	12	70	0.17	0.44093	0.6718	AKT2 CHUK NFKBIA PIK3R3 CD81 LILRB3 INPPL1 CD22 IFITM1 CD79A NFKBIE PPP3CC
path:hsa04919	Thyroid hormone signaling pathway	20	116	0.17	0.451658	0.674245	HDAC3 HIF1A SIN3A AKT2 MED24 RXRB PLCD1 KAT2A PIK3R3 RCAN2 ITGAV MED17 MDM2 MED4 NCOA3 ATP1B1 TP53 STAT1 CCND1 TBC1D4
path:hsa04666	Fc gamma R-mediated phagocytosis	14	82	0.17	0.454635	0.675458	SPHK1 PLD1 LIMK1 HCK VASP AKT2 ARPC1B PIK3R3 PLA2G4A PIP5K1A PAK1 WASF3 INPPL1 ASAP2
path:hsa04914	Progesterone-mediated oocyte maturation	15	88	0.17	0.46069	0.68121	MAPK10 RPS6KA3 AKT2 CDC23 SPDYE1 PIK3R3 IGF1 ANAPC7 RPS6KA1 PDE3B GNAI1 ADCY3 MAD2L1 CCNB1 CDK1
path:hsa04923	Regulation of lipolysis in adipocytes	9	54	0.17	0.464701	0.68298	AKT2 MGLL PIK3R3 PDE3B GNAI1 PLA2G16 ADCY3 FABP4 IRS2
path:hsa05216	Thyroid cancer	6	37	0.16	0.466265	0.68298	NCOA4 RXRB TCF7L2 TPR TP53 CCND1
path:hsa05412	Arrhythmogenic right ventricular cardiomyopathy (ARVC)	12	72	0.17	0.484431	0.706273	RYR2 CTNNA2 CACNG6 ITGB5 GJA1 TCF7L2 CACNA2D1 ITGAV DSC2 ITGB1 CACNA2D3 DSP
path:hsa04721	Synaptic vesicle cycle	10	61	0.16	0.495548	0.719121	AP2A2 ATP6V0B AP2S1 ATP6V1B2 UNC13B ATP6V1F VAMP2 ATP6V1G1 ATP6V0E1 STXBP1
path:hsa04150	mTOR signaling pathway	24	142	0.17	0.501194	0.719834	WNT2 FNIP2 RPS6KA3 FZD4 AKT2 CHUK TNFRSF1A LRP6 SLC3A2 PIK3R3 FZD7 ATP6V1B2 RRAGD ATP6V1F IGF1 RPS6KA1 STRADB ATP6V1G1 EIF4EBP1 LPIN1 WNT5A FZD6 FZD2 SLC7A5
path:hsa04622	RIG-I-like receptor signaling pathway	11	67	0.16	0.500979	0.719834	MAPK10 IL12B CXCL10 CHUK TMEM173 NFKBIA PIN1 SIKE1 RNF125 MAP3K1 ISG15
path:hsa04930	Type II diabetes mellitus	7	44	0.16	0.502961	0.719834	HK3 HK1 MAPK10 SOCS2 PIK3R3 IRS2 ADIPOQ
path:hsa00601	Glycosphingolipid biosynthesis - lacto and neolacto series	4	27	0.15	0.514106	0.732425	B3GNT4 B4GALT1 ST8SIA1 FUT4
path:hsa05217	Basal cell carcinoma	10	62	0.16	0.518857	0.735834	WNT2 FZD4 TCF7L2 FZD7 BMP2 WNT5A AXIN1 TP53 FZD6 FZD2
path:hsa00830	Retinol metabolism	7	45	0.16	0.530273	0.748621	CYP26A1 UGT2B17 AOX1 DHRS3 ADH5 ALDH1A1 SDR16C5
path:hsa04350	TGF-beta signaling pathway	13	81	0.16	0.551179	0.77463	NBL1 ACVR1 RBX1 DCN SP1 INHBA ID2 SMAD1 THBS1 BMP2 ID1 IFNG SMAD7
path:hsa00190	Oxidative phosphorylation	19	117	0.16	0.566302	0.792315	UQCRC1 PPA2 SDHD UQCRFS1 UQCR10 CYC1 NDUFA11 ATP5B ATP6V0B ATP6AP1 COX8A ATP6V1B2 COX8C NDUFB6 PPA1 ATP6V1F NDUFAB1 ATP6V1G1 ATP6V0E1
path:hsa05218	Melanoma	12	76	0.16	0.568909	0.792409	MITF PDGFRA AKT2 PDGFC PIK3R3 MDM2 IGF1 PDGFRB CDK4 TP53 CCND1 FGF13
path:hsa04550	Signaling pathways regulating pluripotency of stem cells	22	135	0.16	0.572744	0.794205	WNT2 ACVR1 TCF3 LIF FZD4 AKT2 SKIL INHBA PIK3R3 FZD7 SMARCAD1 ID2 SMAD1 IGF1 PCGF6 JAK2 WNT5A AXIN1 ID1 FZD6 FZD2 LIFR
path:hsa04710	Circadian rhythm	4	29	0.14	0.581858	0.803273	RBX1 FBXW11 BHLHE40 CRY1
path:hsa05211	Renal cell carcinoma	10	65	0.15	0.58652	0.806142	HIF1A RBX1 AKT2 PIK3R3 PAK3 PAK1 EPAS1 ETS1 EGLN3 ARNT2
path:hsa04750	Inflammatory mediator regulation of TRP channels	14	89	0.16	0.591981	0.810079	PPP1CC MAPK10 IL1R1 GNAQ PRKCQ PTGER2 PIK3R3 PLA2G4A PTGER4 IGF1 PLA2G4C ADCY3 IL1B PRKCH
path:hsa05210	Colorectal cancer	11	72	0.15	0.60852	0.829075	MLH1 MAPK10 AKT2 CYCS PIK3R3 TCF7L2 RALGDS AXIN1 TP53 CCND1 APPL1
path:hsa04530	Tight junction	26	162	0.16	0.622173	0.843991	MAPK10 MPDZ VASP CD1B RAP2C ACTN1 NEDD4 CGNL1 PCNA TUBA1C TIAM1 TJP2 CLDN20 ITGB1 MAP3K5 AMOTL2 EZR TUBA1B ACTR2 CDK4 MYH3 ARHGAP17 MYH10 CCND1 MAP3K1 TUBA1A
path:hsa04146	Peroxisome	12	79	0.15	0.628468	0.847184	SLC27A2 ACSL3 GSTK1 PEX12 EHHADH PEX11B DECR2 PHYH SCP2 AGPS ACSL1 SOD2
path:hsa04213	Longevity regulating pathway - multiple species	9	61	0.15	0.629957	0.847184	AKT2 PIK3R3 CRYAB IGF1 ADCY3 SIRT1 SOD2 IRS2 HSPA1A
path:hsa04015	Rap1 signaling pathway	33	205	0.16	0.641482	0.85524	FPR1 F2R TEK PDGFRA VASP AKT2 EFNA1 CSF1R MRAS LPAR1 GNAQ FYB PDGFC SIPA1L2 PIK3R3 TLN1 LCP2 VEGFC TIAM1 IGF1 THBS1 RALGDS ITGB1 PDGFRB KDR GNAI1 ADCY3 SIPA1 ID1 RRAS ITGAM FGF13 KIT
path:hsa04215	Apoptosis - multiple species	4	31	0.13	0.644171	0.85524	MAPK10 CYCS TNFRSF1A BID
path:hsa04973	Carbohydrate digestion and absorption	5	37	0.14	0.638971	0.85524	HK3 HK1 AKT2 PIK3R3 ATP1B1
path:hsa04722	Neurotrophin signaling pathway	18	117	0.15	0.661273	0.874225	PSEN1 MAPK10 RPS6KA3 SH2B3 AKT2 RIPK2 SORT1 NFKBIA FASLG ABL1 PIK3R3 RPS6KA1 MAP3K5 YWHAE TP53 NFKBIE CAMK4 MAP3K1
path:hsa00040	Pentose and glucuronate interconversions	2	19	0.11	0.664439	0.874705	UGT2B17 CRYL1
path:hsa00730	Thiamine metabolism	1	13	0.077	0.686592	0.90007	AK4
path:hsa00532	Glycosaminoglycan biosynthesis - chondroitin sulfate / dermatan sulfate	2	20	0.1	0.699466	0.907268	CHST14 CHST7
path:hsa01521	EGFR tyrosine kinase inhibitor resistance	11	77	0.14	0.703714	0.907268	PDGFRA AKT2 AXL PDGFC PIK3R3 IGF1 EIF4EBP1 PDGFRB JAK2 KDR IL6
path:hsa05213	Endometrial cancer	8	58	0.14	0.695962	0.907268	CTNNA2 MLH1 AKT2 PIK3R3 TCF7L2 AXIN1 TP53 CCND1
path:hsa05220	Chronic myeloid leukemia	11	77	0.14	0.703714	0.907268	AKT2 CHUK NFKBIA ABL1 PIK3R3 MDM2 CDKN1B CDK4 CTBP2 TP53 CCND1
path:hsa04913	Ovarian steroidogenesis	6	46	0.13	0.707298	0.908136	CYP1B1 PLA2G4A IGF1 PLA2G4C AKR1C3 ADCY3
path:hsa05310	Asthma	3	27	0.11	0.712977	0.911676	FCER1G IL10 HLA-DOB
path:hsa04970	Salivary secretion	12	85	0.14	0.73369	0.934332	GNAQ GUCY1B3 LYZ CST3 GUCY1A3 ATP2B4 VAMP2 ATP1B1 ADCY3 HTN3 STATH HTN1
path:hsa00562	Inositol phosphate metabolism	10	73	0.14	0.741887	0.940789	IMPA1 INPP5E INPP5K PLCD1 INPP4B PIP5K1A TPI1 INPPL1 MINPP1 PIK3CG
path:hsa04360	Axon guidance	26	172	0.15	0.745613	0.940789	EFNB3 EPHB1 SEMA5B LIMK1 SLIT2 EFNA1 SEMA5A ABL1 CXCL12 PIK3R3 SEMA3C SEMA4C PAK3 FYN PAK1 ITGB1 WNT5A GNAI1 RASA1 FES RRAS TRPC1 PPP3CC EFNB2 ROBO1 DPYSL2
path:hsa05034	Alcoholism	23	154	0.15	0.749325	0.940789	HDAC3 PPP1CC GNB2 ATF6B HIST1H4E HIST2H2AA3 HIST3H2A GNG12 HIST1H4C GNG10 GNAI1 GNG5 HIST1H4H HIST1H4B HIST1H2AC HIST1H2BK HIST1H2AJ CAMK4 HIST1H2BI HIST1H3I HIST1H2AE HIST1H2BF GNG11
path:hsa05224	Breast cancer	22	148	0.15	0.750822	0.940789	WNT2 FZD4 AKT2 SP1 LRP6 PIK3R3 TCF7L2 FZD7 JAG1 IGF1 NCOA3 WNT5A AXIN1 HEY1 CDK4 BRCA1 TP53 FZD6 FZD2 CCND1 FGF13 KIT
path:hsa04977	Vitamin digestion and absorption	2	22	0.091	0.761025	0.945975	TCN2 SLC19A2
path:hsa05100	Bacterial invasion of epithelial cells	10	74	0.14	0.758221	0.945975	CTNNA2 FN1 ARPC1B RHOG PIK3R3 CAV1 CAV2 SEPT8 SEPT6 ITGB1
path:hsa04727	GABAergic synapse	12	87	0.14	0.764063	0.945983	GNB2 GLUL SLC38A5 GNG12 GNG10 GNAI1 ADCY3 GNG5 GABRP SLC38A2 GABRB2 GNG11
path:hsa04730	Long-term depression	7	56	0.12	0.778146	0.952308	GNAQ GUCY1B3 PLA2G4A GUCY1A3 IGF1 PLA2G4C GNAI1
path:hsa05032	Morphine addiction	12	88	0.14	0.778329	0.952308	GNB2 ARRB1 PDE7A GNG12 GNG10 PDE3B GNAI1 ADCY3 GNG5 GABRP GABRB2 GNG11
path:hsa05212	Pancreatic cancer	10	75	0.13	0.773831	0.952308	PLD1 MAPK10 AKT2 CHUK PIK3R3 RALGDS CDK4 TP53 STAT1 CCND1
path:hsa00140	Steroid hormone biosynthesis	5	44	0.11	0.798668	0.95473	HSD11B1 UGT2B17 CYP1B1 SRD5A3 AKR1C3
path:hsa03020	RNA polymerase	3	30	0.1	0.789118	0.95473	POLR2A POLR1B POLR2E
path:hsa04664	Fc epsilon RI signaling pathway	8	63	0.13	0.786797	0.95473	FCER1G MAPK10 AKT2 PIK3R3 PLA2G4A FYN LCP2 PLA2G4C
path:hsa04960	Aldosterone-regulated sodium reabsorption	4	37	0.11	0.793268	0.95473	PIK3R3 IGF1 ATP1B1 SFN
path:hsa05214	Glioma	9	70	0.13	0.795039	0.95473	PDGFRA AKT2 PIK3R3 MDM2 IGF1 PDGFRB CDK4 TP53 CCND1
path:hsa05410	Hypertrophic cardiomyopathy (HCM)	11	83	0.13	0.7971	0.95473	RYR2 CACNG6 ITGB5 TPM4 ACTC1 CACNA2D1 ITGAV IGF1 ITGB1 CACNA2D3 IL6
path:hsa01040	Biosynthesis of unsaturated fatty acids	1	17	0.059	0.820819	0.963505	ACOT4
path:hsa04022	cGMP-PKG signaling pathway	23	161	0.14	0.82145	0.963505	ADORA3 PPP1CC KCNJ8 VASP AKT2 ATF6B GNAQ GUCY1B3 ADRA2A EDNRA GUCY1A3 GTF2I ATP2B4 ATP2A3 PDE3B ATP1B1 GNAI1 ADCY3 PPIF PIK3CG IRS2 PPP3CC KCNMB4
path:hsa04270	Vascular smooth muscle contraction	16	116	0.14	0.811677	0.963505	PPP1CC PLA2G2D GNAQ GUCY1B3 PRKCQ CALCRL EDNRA RAMP3 PLA2G4A GUCY1A3 PLA2G2A CALD1 PLA2G4C ADCY3 PRKCH KCNMB4
path:hsa04922	Glucagon signaling pathway	13	97	0.13	0.812527	0.963505	PGAM1 AKT2 FBP1 PYGL GNAQ ACACA PGAM2 PPP4C PDE3B LDHA SIRT1 LDHB PPP3CC
path:hsa04972	Pancreatic secretion	12	91	0.13	0.81746	0.963505	RYR2 PLA2G2D GNAQ ATP2B4 PLA2G2A ATP2A3 ATP1B1 CA2 ADCY3 CLCA4 TRPC1 CPA3
path:hsa04725	Cholinergic synapse	15	111	0.14	0.826405	0.965687	KCNJ2 GNB2 AKT2 GNAQ PIK3R3 GNG12 FYN GNG10 JAK2 GNAI1 ADCY3 GNG5 PIK3CG CAMK4 GNG11
path:hsa00650	Butanoate metabolism	2	25	0.08	0.833748	0.967024	EHHADH HADH
path:hsa04520	Adherens junction	8	66	0.12	0.830816	0.967024	CTNNA2 SNAI2 SSX2IP TCF7L2 ACTN1 FYN WASF3 PTPRM
path:hsa00512	Mucin type O-glycan biosynthesis	2	26	0.077	0.853344	0.978836	GALNT7 B4GALT5
path:hsa04140	Autophagy - animal	16	120	0.13	0.852175	0.978836	RAB7A LAMP2 HIF1A MAPK10 AKT2 MRAS CTSB ATG4D PRKCQ PIK3R3 RRAGD CTSD DAPK1 BNIP3 RRAS IRS2
path:hsa04726	Serotonergic synapse	14	107	0.13	0.851247	0.978836	ALOX15B GNB2 GNAQ GNG12 PLA2G4A GNG10 PLA2G4C APP GNAI1 GNG5 TRPC1 GABRB2 HTR3A GNG11
path:hsa04912	GnRH signaling pathway	11	89	0.12	0.867106	0.987362	MMP14 PLD1 MAPK10 MMP2 MAP3K4 GNAQ PLA2G4A PLA2G4C ADCY3 PTK2B MAP3K1
path:hsa05414	Dilated cardiomyopathy (DCM)	11	89	0.12	0.867106	0.987362	RYR2 CACNG6 ITGB5 TPM4 ACTC1 CACNA2D1 ITGAV IGF1 ITGB1 ADCY3 CACNA2D3
path:hsa04810	Regulation of actin cytoskeleton	29	206	0.14	0.876844	0.990164	CYFIP1 ITGB5 PPP1CC FN1 F2R LIMK1 PDGFRA MRAS NCKAP1 CD14 ARPC1B IQGAP2 PDGFC PIK3R3 GNG12 ACTN1 PAK3 ITGAV PIP5K1A PAK1 TIAM1 ITGB1 PDGFRB EZR SPATA13 RRAS MYH10 ITGAM FGF13
path:hsa04910	Insulin signaling pathway	18	136	0.13	0.878151	0.990164	HK3 PPP1CC HK1 MAPK10 SOCS2 INPP5K AKT2 FBP1 PYGL MKNK1 ACACA PIK3R3 MKNK2 PRKAR2B INPPL1 PDE3B EIF4EBP1 IRS2
path:hsa05016	Huntingtons disease	25	181	0.14	0.879088	0.990164	UQCRC1 POLR2A GPX1 AP2A2 SDHD SIN3A UQCRFS1 UQCR10 DCTN2 CYCS CYC1 NDUFA11 SP1 ATP5B GNAQ AP2S1 COX8A COX8C NDUFB6 POLR2E NDUFAB1 DNAH8 SOD2 PPIF TP53
path:hsa04340	Hedgehog signaling pathway	4	43	0.093	0.888429	0.993512	ARRB1 FBXW11 CCND1 CCND2
path:hsa04744	Phototransduction	2	28	0.071	0.886552	0.993512	PDE6G SLC24A1
path:hsa00900	Terpenoid backbone biosynthesis	1	22	0.045	0.915039	0.999299	ZMPSTE24
path:hsa02010	ABC transporters	3	43	0.07	0.954717	0.999299	ABCG2 ABCA1 ABCG1
path:hsa03015	mRNA surveillance pathway	9	83	0.11	0.928169	0.999299	PPP1CC ETF1 EIF4A3 FIP1L1 CSTF2T SMG7 NXT1 RNMT ACIN1
path:hsa04012	ErbB signaling pathway	8	83	0.096	0.963352	0.999299	MAPK10 AKT2 ABL1 PIK3R3 PAK3 PAK1 CDKN1B EIF4EBP1
path:hsa04020	Calcium signaling pathway	20	178	0.11	0.984107	0.999299	RYR2 SPHK1 F2R ORAI1 PDGFRA GNA15 GNAQ PLCD1 GRPR EDNRA ATP2B4 ATP2A3 PDGFRB ADCY3 PTK2B P2RX4 PPIF TNNC2 CAMK4 PPP3CC
path:hsa04024	cAMP signaling pathway	22	191	0.12	0.982968	0.999299	RYR2 SUCNR1 PPP1CC PLD1 F2R ORAI1 MAPK10 SSTR5 AKT2 NFKBIA PTGER2 PIK3R3 EDNRA PAK1 ATP2B4 TIAM1 PDE3B ATP1B1 GNAI1 ADCY3 RRAS CAMK4
path:hsa04070	Phosphatidylinositol signaling system	10	98	0.1	0.964955	0.999299	PPIP5K2 IMPA1 INPP5E INPP5K PLCD1 PIK3R3 INPP4B PIP5K1A INPPL1 TMEM55A
path:hsa04136	Autophagy - other	1	29	0.034	0.971787	0.999299	ATG4D
path:hsa04152	AMPK signaling pathway	14	118	0.12	0.931897	0.999299	AKT2 FBP1 ADIPOR2 EEF2 ACACA PIK3R3 IGF1 STRADB EIF4EBP1 CD36 SIRT1 IRS2 CCND1 ADIPOQ
path:hsa04261	Adrenergic signaling in cardiomyocytes	15	144	0.1	0.985864	0.999299	RYR2 CACNG6 PPP1CC AKT2 TPM4 ATF6B GNAQ ACTC1 CACNA2D1 ATP2B4 ATP1B1 GNAI1 ADCY3 PIK3CG CACNA2D3
path:hsa04713	Circadian entrainment	11	96	0.11	0.922932	0.999299	RYR2 GNB2 GNAQ GUCY1B3 GNG12 GUCY1A3 GNG10 GNAI1 ADCY3 GNG5 GNG11
path:hsa04720	Long-term potentiation	6	67	0.09	0.958677	0.999299	PPP1CC RPS6KA3 GNAQ RPS6KA1 CAMK4 PPP3CC
path:hsa04723	Retrograde endocannabinoid signaling	15	138	0.11	0.976226	0.999299	MAPK10 GNB2 NDUFA11 GNAQ MGLL GNG12 NDUFB6 GNG10 NDUFAB1 GNAI1 ADCY3 GNG5 GABRP GABRB2 GNG11
path:hsa04728	Dopaminergic synapse	13	130	0.1	0.986487	0.999299	PPP1CC MAPK10 CALY GNB2 AKT2 ATF6B GNAQ GNG12 GNG10 GNAI1 GNG5 PPP3CC GNG11
path:hsa04911	Insulin secretion	8	84	0.095	0.966841	0.999299	RYR2 ATF6B GNAQ VAMP2 ATP1B1 ADCY3 TRPM4 KCNMB4
path:hsa04915	Estrogen signaling pathway	10	95	0.11	0.95386	0.999299	AKT2 SP1 MMP2 ATF6B GNAQ MMP9 PIK3R3 GNAI1 ADCY3 HSPA1A
path:hsa04916	Melanogenesis	12	100	0.12	0.904033	0.999299	WNT2 MITF FZD4 GNAQ TCF7L2 FZD7 WNT5A GNAI1 ADCY3 FZD6 FZD2 KIT
path:hsa04918	Thyroid hormone synthesis	7	73	0.096	0.952128	0.999299	GPX8 GPX1 ATF6B GNAQ ATP1B1 ADCY3 GPX3
path:hsa04921	Oxytocin signaling pathway	18	149	0.12	0.949234	0.999299	RYR2 CACNG6 PPP1CC KCNJ2 GNAQ GUCY1B3 EEF2 PLA2G4A CACNA2D1 GUCY1A3 PLA2G4C GNAI1 ADCY3 PIK3CG CAMK4 PPP3CC CCND1 CACNA2D3
path:hsa04961	Endocrine and other factor-regulated calcium reabsorption	4	47	0.085	0.928477	0.999299	AP2A2 GNAQ AP2S1 ATP1B1
path:hsa04962	Vasopressin-regulated water reabsorption	3	44	0.068	0.960195	0.999299	DCTN2 VAMP2 ADCY3
path:hsa04971	Gastric acid secretion	8	74	0.11	0.914018	0.999299	KCNJ2 KCNJ10 GNAQ ATP1B1 GNAI1 CA2 ADCY3 EZR
path:hsa04976	Bile secretion	7	67	0.1	0.914092	0.999299	AQP9 ABCG2 ATP1B1 CA2 ADCY3 AQP1 EPHX1
path:hsa05012	Parkinsons disease	15	123	0.12	0.922522	0.999299	UQCRC1 SDHD UQCRFS1 UQCR10 CYCS CYC1 NDUFA11 ATP5B COX8A COX8C NDUFB6 NDUFAB1 GNAI1 PPIF LRRK2
path:hsa05030	Cocaine addiction	3	49	0.061	0.979473	0.999299	ATF6B GPSM1 GNAI1
path:hsa05031	Amphetamine addiction	5	68	0.074	0.984957	0.999299	PPP1CC ATF6B SIRT1 CAMK4 PPP3CC
path:hsa05033	Nicotine addiction	2	38	0.053	0.971395	0.999299	GABRP GABRB2
path:hsa05160	Hepatitis C	13	125	0.1	0.978647	0.999299	MAPK10 NR1H3 AKT2 CHUK TNFRSF1A NFKBIA PIK3R3 CD81 CLDN20 IRF1 TP53 STAT1 IFIT1
path:hsa05223	Non-small cell lung cancer	6	66	0.091	0.954019	0.999299	AKT2 RXRB PIK3R3 CDK4 TP53 CCND1
path:hsa04080	Neuroactive ligand-receptor interaction	27	269	0.1	0.999509	0.999997	FPR1 ADORA3 F2R FPR3 SSTR5 LPAR1 PTGER2 APLNR GZMA ADRA2A P2RY13 GRPR CALCRL C3AR1 EDNRA PTGER4 TSPO S1PR3 C5AR1 P2RY14 GABRP P2RX4 KISS1R LPAR6 GABRB2 P2RY8 S1PR1
path:hsa04740	Olfactory transduction	4	117	0.034	0.999997	0.999997	OR2B6 OR51E1 ARRB1 ADCY3
path:hsa04742	Taste transduction	3	71	0.042	0.999139	0.999997	SCN2A CALHM1 HTR3A
path:hsa04925	Aldosterone synthesis and secretion	5	82	0.061	0.997491	0.999997	ORAI1 ATF6B GNAQ ADCY3 CAMK4

## Sheet: Supplementary Table 7
Supplementary Table 7. Collected cytokine genes and their classifications.
Genes	Description	Class
IL1A	interleukin-1-alpha	Interleukins
IL1B	interleukin-1-beta	Interleukins
IL1F1	Interleukin-1 family member 1, IL1A	Interleukins
IL1F2	Interleukin-1 family member 2, IL1B	Interleukins
IL1F3	Interleukin-1 family member 3, IL1RN	Interleukins
IL1F4	Interleukin-1 family member 4, IL18	Interleukins
IL1F5	Interleukin-1 family member 5, IL36RN	Interleukins
IL1F6	Interleukin-1 family member 6, IL36A	Interleukins
IL1F7	Interleukin-1 family member 7, IL37	Interleukins
IL1F8	Interleukin-1 family member 8, IL36B	Interleukins
IL1F9	Interleukin-1 family member 9, IL36G	Interleukins
IL1F10	Interleukin-1 family member 10, IL38	Interleukins
IL1F11	Interleukin-1 family member 11, IL33	Interleukins
IL1RN	Interleukin-1 receptor antagonist	Interleukins
IL1H1	IL1 homolog-1, IL36G	Interleukins
IL1H2	IL1 homolog-2, IL36B	Interleukins
IL1H3	IL1 homolog-3, IL36RN	Interleukins
IL1H4	IL1 homolog-4, IL37	Interleukins
IL1RP1	IL1-related protein-1, IL37	Interleukins
IL1RP2	IL1-related protein-2, IL36G	Interleukins
IL1RP3	IL1-related protein-3, IL36RN	Interleukins
IL2	interleukin-2	Interleukins
IL3	interleukin-3	Interleukins
IL4	interleukin-4	Interleukins
IL5	interleukin-5	Interleukins
IL6	interleukin-6	Interleukins
IL7	interleukin-7	Interleukins
IL8	interleukin-8	Interleukins
IL9	interleukin-9	Interleukins
IL10	interleukin-10	Interleukins
IL10C	interleukin-10C, IL19	Interleukins
IL10D	interleukin-10D, IL20	Interleukins
IL11	interleukin-11	Interleukins
IL12A	interleukin-12A	Interleukins
IL12B	interleukin-12B	Interleukins
IL13	interleukin-13	Interleukins
IL14	interleukin-14, TXLNA	Interleukins
IL15	interleukin-15	Interleukins
IL16	interleukin-16	Interleukins
IL17A	interleukin-17A	Interleukins
IL17B	interleukin-17B	Interleukins
IL17C	interleukin-17C	Interleukins
IL17D	interleukin-17D	Interleukins
IL17E	interleukin-17E, IL25	Interleukins
IL17F	interleukin-17F	Interleukins
IL18	interleukin-18	Interleukins
IL19	interleukin-19	Interleukins
IL20	interleukin-20	Interleukins
IL21	interleukin-21	Interleukins
IL22	interleukin-22	Interleukins
IL23A	interleukin-23A	Interleukins
IL24	interleukin-24	Interleukins
IL25	interleukin-25	Interleukins
IL26	interleukin-26	Interleukins
IL27	interleukin-27	Interleukins
IL28A	interferon lambda 2, IFNL2	Interleukins
IL28B	interferon lambda 3, IFNL3	Interleukins
IL29	interferon lambda 1, IFNL1	Interleukins
IL30	interleukin-30, IL27	Interleukins
IL31	interleukin-31	Interleukins
IL32	interleukin-32	Interleukins
IL33	interleukin-33	Interleukins
IL34	interleukin-34	Interleukins
IL36A	interleukin-36-alpha	Interleukins
IL36B	interleukin-36-beta	Interleukins
IL36G	interleukin-36-gamma	Interleukins
IL36RN	interleukin-36 receptor antagonist	Interleukins
IL37	interleukin-37	Interleukins
IL38	interleukin-38	Interleukins
CCL1	C-C motif chemokine ligand 1	Chemokines
CCL2	C-C motif chemokine ligand 2	Chemokines
CCL3	C-C motif chemokine ligand 3	Chemokines
CCL4	C-C motif chemokine ligand 4	Chemokines
CCL5	C-C motif chemokine ligand 5	Chemokines
CCL6	C-C motif chemokine ligand 6	Chemokines
CCL7	C-C motif chemokine ligand 7	Chemokines
CCL8	C-C motif chemokine ligand 8	Chemokines
CCL9	C-C motif chemokine ligand 9	Chemokines
CCL10	C-C motif chemokine ligand 10	Chemokines
CCL11	C-C motif chemokine ligand 11	Chemokines
CCL12	C-C motif chemokine ligand 12	Chemokines
CCL13	C-C motif chemokine ligand 13	Chemokines
CCL14	C-C motif chemokine ligand 14	Chemokines
CCL15	C-C motif chemokine ligand 15	Chemokines
CCL16	C-C motif chemokine ligand 16	Chemokines
CCL17	C-C motif chemokine ligand 17	Chemokines
CCL18	C-C motif chemokine ligand 18	Chemokines
CCL19	C-C motif chemokine ligand 19	Chemokines
CCL20	C-C motif chemokine ligand 20	Chemokines
CCL21	C-C motif chemokine ligand 21	Chemokines
CCL22	C-C motif chemokine ligand 22	Chemokines
CCL23	C-C motif chemokine ligand 23	Chemokines
CCL24	C-C motif chemokine ligand 24	Chemokines
CCL25	C-C motif chemokine ligand 25	Chemokines
CCL26	C-C motif chemokine ligand 26	Chemokines
CCL27	C-C motif chemokine ligand 27	Chemokines
CCL28	C-C motif chemokine ligand 28	Chemokines
CX3CL1	C-X3-C motif chemokine ligand 1	Chemokines
AIFM1	apoptosis inducing factor mitochondria associated 1	Chemokines
AIFM2	apoptosis inducing factor mitochondria associated 2	Chemokines
AIFM3	apoptosis inducing factor mitochondria associated 3	Chemokines
IL8L2	interleukin 8-like 2	Chemokines
CXCL1	C-X-C motif chemokine ligand 1	Chemokines
CXCL2	C-X-C motif chemokine ligand 2	Chemokines
CXCL3	C-X-C motif chemokine ligand 3	Chemokines
PF4	platelet factor 4, CXCL4	Chemokines
CXCL5	C-X-C motif chemokine ligand 5	Chemokines
CXCL6	C-X-C motif chemokine ligand 6	Chemokines
PPBP	pro-platelet basic protein, CXCL7	Chemokines
CXCL8	C-X-C motif chemokine ligand 8	Chemokines
CXCL9	C-X-C motif chemokine ligand 9	Chemokines
CXCL10	C-X-C motif chemokine ligand 10	Chemokines
CXCL11	C-X-C motif chemokine ligand 11	Chemokines
CXCL12	C-X-C motif chemokine ligand 12	Chemokines
CXCL13	C-X-C motif chemokine ligand 13	Chemokines
CXCL14	C-X-C motif chemokine ligand 14	Chemokines
CXCL16	C-X-C motif chemokine ligand 16	Chemokines
CXCL17	C-X-C motif chemokine ligand 17	Chemokines
LIF	interleukin 6 family cytokine	Chemokines
PF4V1	platelet factor 4 variant 1	Chemokines
TSG-1	tumor necrosis factor-stimulated gene sequence 1	Chemokines
XCL1	X-C motif chemokine ligand 1	Chemokines
XCL2	X-C motif chemokine ligand 2	Chemokines
CCL4L1	C-C motif chemokine ligand 4 like 1	Chemokines
CCL4L2	C-C motif chemokine ligand 4 like 2	Chemokines
CCL3L1	C-C motif chemokine ligand 3 like 1	Chemokines
CCL3L2	C-C motif chemokine ligand 3 like 2	Chemokines
CCL3L3	C-C motif chemokine ligand 3 like 3	Chemokines
IFNA1	interferon alpha 1	Interferons
IFNA2	interferon alpha 2	Interferons
IFNA4	interferon alpha 4	Interferons
IFNA5	interferon alpha 5	Interferons
IFNA6	interferon alpha 6	Interferons
IFNA7	interferon alpha 7	Interferons
IFNA8	interferon alpha 8	Interferons
IFNA10	interferon alpha 10	Interferons
IFNA13	interferon alpha 13	Interferons
IFNA14	interferon alpha 14	Interferons
IFNA16	interferon alpha 16	Interferons
IFNA17	interferon alpha 17	Interferons
IFNA21	interferon alpha 21	Interferons
IFNB1	interferon beta 1	Interferons
IFNG	interferon gamma	Interferons
IFNK	interferon kappa	Interferons
IFNE	interferon epsilon	Interferons
IFNW1	interferon omega 1	Interferons
CSF1	colony stimulating factor 1	Colony stimulating factors
CSF2	colony stimulating factor 2	Colony stimulating factors
CSF3	colony stimulating factor 3	Colony stimulating factors
TNF	tumor necrosis factor	Tumor necrosis factors
EDA	ectodysplasin A	Tumor necrosis factors
LTA	lymphotoxin alpha, TNFSF1	Tumor necrosis factors
LTB	lymphotoxin beta, TNFSF3	Tumor necrosis factors
TNFSF4	TNF superfamily member 4	Tumor necrosis factors
CD40LG	CD40 ligand, TNFSF5	Tumor necrosis factors
FASLG	Fas ligand, TNFSF6	Tumor necrosis factors
CD70	CD70 molecule, TNFSF7	Tumor necrosis factors
TNFSF8	TNF superfamily member 8	Tumor necrosis factors
TNFSF9	TNF superfamily member 9	Tumor necrosis factors
TNFSF10	TNF superfamily member 10	Tumor necrosis factors
TNFSF11	TNF superfamily member 11	Tumor necrosis factors
TNFSF12	TNF superfamily member 12	Tumor necrosis factors
TNFSF13	TNF superfamily member 13	Tumor necrosis factors
TNFSF13B	TNF superfamily member 13b	Tumor necrosis factors
TNFSF14	TNF superfamily member 14	Tumor necrosis factors
TNFSF15	TNF superfamily member 15	Tumor necrosis factors
TNFSF18	TNF superfamily member 18	Tumor necrosis factors
